# Supplementary material for: A visible light-mediated, decarboxylative, desulfonylative Smiles rearrangement for general arylethylamine syntheses
Source: Royal Society of Chemistry journal article supplement (doi:10.1039/d0cc05049k), 2020-01-01
Supplement: d0cc05049k1.pdf [file d0cc05049k1.pdf]

# Supporting Information

## **A Visible Light-Mediated, Decarboxylative, Desulfonylative Smiles Rearrangement For General Arylethylamine Syntheses**

David M. Whalley, Hung A. Duong, Michael F. Greaney

## Contents

|                                         |    |
|-----------------------------------------|----|
| Optimisation                            | 1  |
| Experimental Procedures                 | 3  |
| Spectral Data <i>Starting Materials</i> | 27 |
| Spectral Data <i>Products</i>           | 49 |
| References                              | 67 |

## General Remarks

$^1\text{H}$ -NMR,  $^{13}\text{C}\{^1\text{H}\}$ -NMR and were recorded at 500/400 MHz, 126/101 MHz, on a Bruker 400 spectrometers. All spectra are referenced to  $\text{CDCl}_3$  residual  $\text{CHCl}_3$  peak ( $^1\text{H}$  NMR  $\delta = 7.26$  ppm;  $^{13}\text{C}\{^1\text{H}\}$  NMR  $\delta = 77.16$  ppm) or to acetone- $d_6$  residual acetone peak ( $^1\text{H}$  NMR  $\delta = 2.05$  ppm;  $^{13}\text{C}\{^1\text{H}\}$  NMR  $\delta = 29.84$  ppm). All chemical shifts are quoted in parts per million (ppm), measured from the centre of the signal except in the case of multiplets, which are quoted as a range. Coupling constants are quoted to the nearest 0.1 Hz. Splitting patterns are abbreviated as follows: singlet (s), doublet (d), triplet (t), quartet (q), quintet (quin.), septet (sept.), multiplet (m), and combinations thereof. High resolution mass spectrometry was measured using an Agilent 6200 series TOF LC/MS system. Melting points were determined using a Büchi Melting Point B-540 and are uncorrected. Thin layer chromatography (TLC) was performed using pre-coated Merck 60F254 silica plates. Visualization was performed using either UV light or treatment with acidified potassium permanganate solution. Flash chromatography was performed using Merck silica gel 60 (0.040 – 0.063 mm). Light mediated reactions were irradiated by a A360WE Tuna Blue aquarium light ([http://www.kessil.com/aquarium/Saltwater\\_A360.php](http://www.kessil.com/aquarium/Saltwater_A360.php)). UV reactions were irradiated with an Omnicure S2000 UV Curing System fitted with a 365 nm filter. Chiral HPLC was conducted using a Shimadzu UFLC LC20AD system.  $[\text{Ir}(\text{dF}(\text{CF}_3)\text{ppy})_2(\text{dtbbpy})]\text{PF}_6$  was purchased from Strem Chemicals.

## Optimisation

### Oxime Variation (0.05 mmol scale)

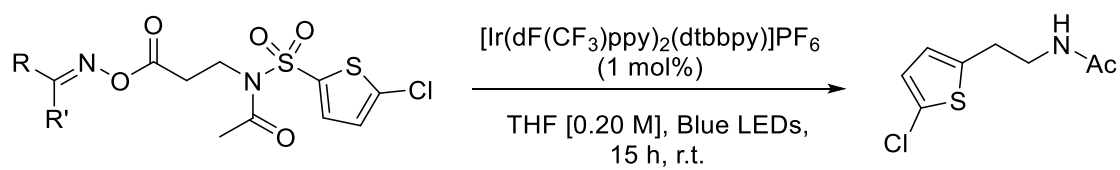

|                 | Substrate | Conversion (%) |
|-----------------|-----------|----------------|
| Oxime variant A |           | 41             |
| Oxime variant B |           | 50             |
| Oxime variant C |           | 45             |
| SM 11a          |           | 63             |

## Reaction conditions optimization

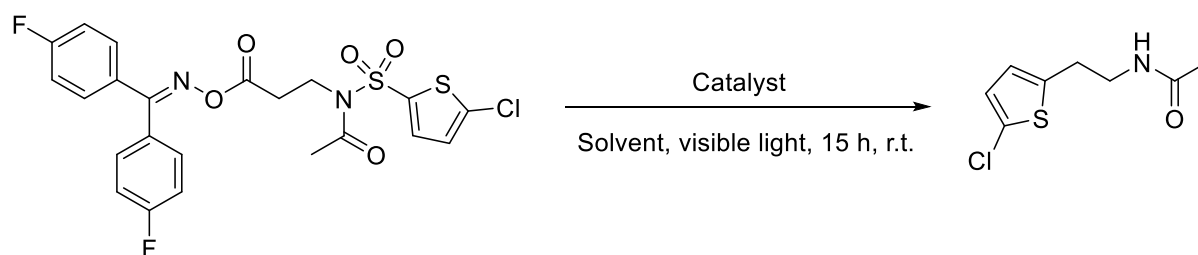

| Entry           | Catalyst                                                             | Solvent           | Irradiation      | Conc. [M]   | Loading (%) | NMR Yield (%)         |
|-----------------|----------------------------------------------------------------------|-------------------|------------------|-------------|-------------|-----------------------|
| 1               | [Ir(dF(CF <sub>3</sub> )ppy) <sub>2</sub> (dtbbpy)]PF <sub>6</sub>   | THF               | Blue LEDs        | 0.20        | 1           | 63                    |
| 2               | [Ir(dF(CF <sub>3</sub> )ppy) <sub>2</sub> (dtbbpy)]PF <sub>6</sub>   | HFIP              | Blue LEDs        | 0.20        | 1           | 14                    |
| 3               | [Ir(dF(CF <sub>3</sub> )ppy) <sub>2</sub> (dtbbpy)]PF <sub>6</sub>   | DCM               | Blue LEDs        | 0.20        | 1           | 14                    |
| 4               | [Ir(dF(CF <sub>3</sub> )ppy) <sub>2</sub> (dtbbpy)]PF <sub>6</sub>   | Dioxane           | Blue LEDs        | 0.20        | 1           | 56                    |
| 5               | [Ir(dF(CF <sub>3</sub> )ppy) <sub>2</sub> (dtbbpy)]PF <sub>6</sub>   | DMSO              | Blue LEDs        | 0.20        | 1           | 30                    |
| 6               | [Ir(dF(CF <sub>3</sub> )ppy) <sub>2</sub> (dtbbpy)]PF <sub>6</sub>   | Me-THF            | Blue LEDs        | 0.20        | 1           | 45                    |
| 7               | [Ir(dF(CF <sub>3</sub> )ppy) <sub>2</sub> (dtbbpy)]PF <sub>6</sub>   | IPA               | Blue LEDs        | 0.20        | 1           | 57                    |
| 8               | [Ir(dF(CF <sub>3</sub> )ppy) <sub>2</sub> (dtbbpy)]PF <sub>6</sub>   | CHCl <sub>3</sub> | Blue LEDs        | 0.20        | 1           | 24                    |
| 9               | [Ir(dF(CF <sub>3</sub> )ppy) <sub>2</sub> (dtbbpy)]PF <sub>6</sub>   | Ethyl acetate     | Blue LEDs        | 0.20        | 1           | 36                    |
| 10              | [Ir(dF(CF <sub>3</sub> )ppy) <sub>2</sub> (dtbbpy)]PF <sub>6</sub>   | Toluene           | Blue LEDs        | 0.20        | 1           | 41                    |
| 11              | [Ir(dF(CF <sub>3</sub> )ppy) <sub>2</sub> (dtbbpy)]PF <sub>6</sub>   | DMF               | Blue LEDs        | 0.20        | 1           | -                     |
| 12              | Ru(bpy) <sub>3</sub> Cl <sub>2</sub> ·6H <sub>2</sub> O              | THF               | Blue LEDs        | 0.20        | 1           | -                     |
| 13              | [Ir(ppy) <sub>2</sub> (dtbbpy)]PF <sub>6</sub>                       | THF               | Blue LEDs        | 0.20        | 1           | -                     |
| 14              | Cu(dmp)(BINAP)BF <sub>4</sub>                                        | THF               | Blue LEDs        | 0.20        | 1           | -                     |
| 15              | [Ir(dF(CF <sub>3</sub> )ppy) <sub>2</sub> (bpy)]PF <sub>6</sub>      | THF               | Blue LEDs        | 0.20        | 1           | 51                    |
| 16              | [Ir(dF(CF <sub>3</sub> )ppy) <sub>2</sub> (dtbbpy)]PF <sub>6</sub>   | THF               | White LEDs       | 0.20        | 1           | 48                    |
| 17 <sup>a</sup> | [Ir(dF(CF <sub>3</sub> )ppy) <sub>2</sub> (dtbbpy)]PF <sub>6</sub>   | THF               | Blue LEDs        | 0.20        | 1           | 53                    |
| 18              | [Ir(dF(CF <sub>3</sub> )ppy) <sub>2</sub> (dtbbpy)]PF <sub>6</sub>   | THF               | Blue LEDs        | 0.50        | 1           | 45                    |
| 19              | [Ir(dF(CF <sub>3</sub> )ppy) <sub>2</sub> (dtbbpy)]PF <sub>6</sub>   | THF               | Blue LEDs        | 0.08        | 1           | 63                    |
| 20              | [Ir(dF(CF <sub>3</sub> )ppy) <sub>2</sub> (dtbbpy)]PF <sub>6</sub>   | THF               | Blue LEDs        | 0.04        | 1           | 57                    |
| 21              | [Ir(dF(CF <sub>3</sub> )ppy) <sub>2</sub> (dtbbpy)]PF <sub>6</sub>   | THF               | Blue LEDs        | 0.08        | 0.25        | 56                    |
| 22              | -                                                                    | THF               | Blue LEDs        | 0.08        | -           | 20                    |
| 23              | [Ir(dF(CF <sub>3</sub> )ppy) <sub>2</sub> (dtbbpy)]PF <sub>6</sub>   | THF               | -                | 0.08        | 1           | 0                     |
| <b>24</b>       | <b>[Ir(dF(CF<sub>3</sub>)ppy)<sub>2</sub>(dtbbpy)]PF<sub>6</sub></b> | <b>THF</b>        | <b>Blue LEDs</b> | <b>0.08</b> | <b>1</b>    | <b>56<sup>b</sup></b> |

Yields determined using a 1, 3, 5 trimethoxybenzene NMR standard. <sup>a</sup> Heated to 60°C in an oil bath.

<sup>b</sup> Isolated yield.

## Experimental Procedures

### General Procedure 1a: Starting Material Synthesis

$\beta$ -amino acid (2.0 mmol, 1.0 eq), was dissolved in aqueous NaOH solution (0.5 M, 8 mL) and THF (8 mL). Aryl sulfonyl chloride (2.0 mmol, 1.0 eq) was added portionwise and stirred at room temperature for 15 h. Concentrated hydrochloric acid was added to the solution dropwise to pH 1 then the mixture was extracted with ethyl acetate. The combined extracts were dried with  $\text{MgSO}_4$  and evaporated under reduced pressure. The resulting sulfonamide crude product could be carried forward without further purification in all cases.

The crude product (1.0 eq) was suspended in anhydrous DCM (0.1 M), to which DMAP (0.10 eq) was added, followed by the respective oxime (1.0 eq). EDC.HCl (2.5 eq) was added portionwise and stirred overnight at room temperature under Ar. Water was added to the reaction mixture and extracted three times with DCM, dried with  $\text{MgSO}_4$  and evaporated under reduced pressure to give the crude oxime ester. The resulting sulfonamide crude product could be carried forward without further purification in all cases. (Adapted from Glorius *et. al.*<sup>1</sup>).

The crude product (1.0 eq) was dissolved in anhydrous DCM (0.1 M), to which DMAP (0.10 eq) was added with stirring. Under Ar, at 0 °C,  $\text{Et}_3\text{N}$  (2.0 eq) was added slowly, followed by AcCl (4.0 eq) dropwise. The reaction was stirred to r.t. overnight. Saturated  $\text{NH}_4\text{Cl}$  solution was added and the reaction mixture extracted three times with DCM, dried with  $\text{MgSO}_4$  and evaporated to dryness. The resulting crude product was then purified with flash column chromatography (20:80 ethyl acetate:hexane).

### General Procedure 1b:

$\beta$ -amino acid (2.0 mmol, 1.0 eq), was dissolved in aqueous NaOMe solution (0.5 M, 8 mL) and THF (8 mL). Aryl sulfonyl chloride (2.0 mmol, 1.0 eq) was added portionwise and stirred at room temperature for 15 h. Concentrated hydrochloric acid was added to the solution dropwise to pH 1 then the mixture was extracted with ethyl acetate. The combined extracts were dried with  $\text{MgSO}_4$  and evaporated under reduced pressure. The resulting sulfonamide crude product could be carried forward without further purification in all cases.

The crude product (1.0 eq) was suspended in anhydrous DCM (0.1 M), to which DMAP (0.10 eq) was added, followed by the respective oxime (1.0 eq). EDC.HCl (2.5 eq) was added portionwise and stirred overnight at room temperature under Ar. Water was added to the reaction mixture and extracted three times with DCM, dried with  $\text{MgSO}_4$  and evaporated under reduced pressure to give the crude oxime ester. The resulting sulfonamide crude product could be carried forward without further purification in all cases. (adapted from Glorius *et. al.*<sup>1</sup>)

The crude product (1.0 eq) was dissolved in anhydrous DCM (0.1 M), to which DMAP (0.10 eq) was added with stirring. Under Ar, at 0 °C,  $\text{Et}_3\text{N}$  (2.0 eq) was added slowly, followed by AcCl (4.0 eq) dropwise. The reaction was stirred to r.t. overnight. Saturated  $\text{NH}_4\text{Cl}$  solution was added and the reaction mixture extracted three times with DCM, dried with  $\text{MgSO}_4$  and evaporated to dryness. The resulting crude product was then purified with flash column chromatography (20:80 ethyl acetate:hexane).

### General Procedure 2a: Visible light-mediated Smiles rearrangement

$[\text{Ir}(\text{dF}(\text{CF}_3)\text{ppy})_2(\text{dtbbpy})]\text{PF}_6$  (2.2 mg, 1 mol %) and the respective starting material (0.2 mmol) were dissolved in anhydrous THF (2.5 mL) in a colourless specimen vial with a septum fitted. The mixture was then vigorously purged with Ar whilst stirring for 10 minutes. The septum was then replaced with a screw-top lid and secured with Parafilm. The reaction mixture was stirred in front of blue LED light whilst cooled to room temperature with a desk fan for 15 h. The reaction mixture was purified directly with flash column chromatography to give the pure products.

### General Procedure 2b: Visible light-mediated Smiles rearrangement (1 mmol)

A specimen vial fitted with septum (secured with Parafilm) and stirrer bar underwent three vacuum/argon cycles. **SM 16d** (527 mg, 1.0 mmol) and  $[\text{Ir}(\text{dF}(\text{CF}_3)\text{ppy})_2(\text{dtbbpy})]\text{PF}_6$  (11.2 mg) were added in THF solution (12.5 mL). The mixture was then vigorously purged with Ar whilst stirring, for 20 minutes. The reaction mixture was stirred in front of blue LED light under an  $\text{N}_2$  balloon whilst cooled to room temperature with a desk fan for 15 h. The reaction mixture was purified directly with flash column chromatography to give the **Product 17d** as an orange oil (79 mg, 47% yield).

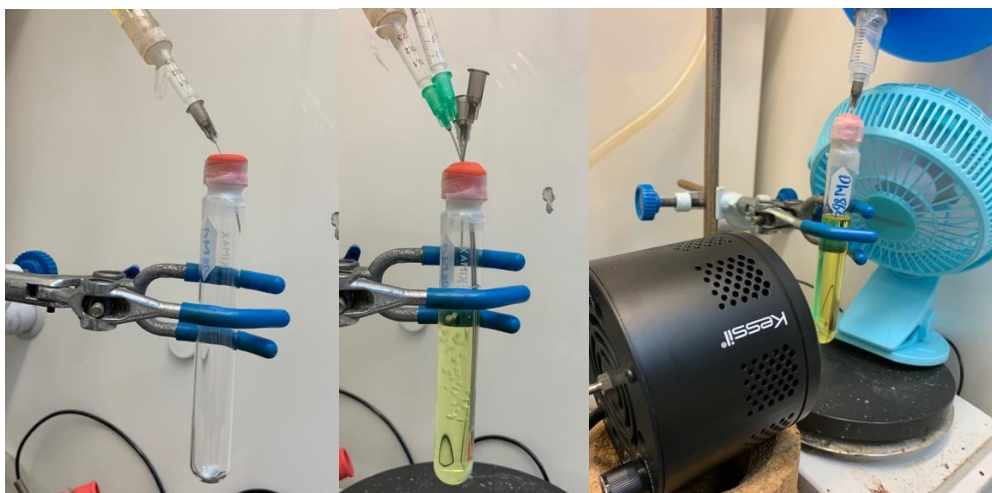

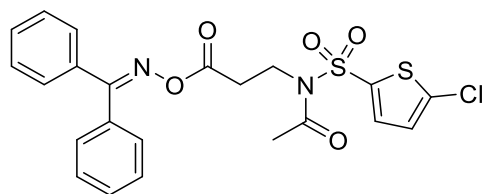

**Oxime variant A** *N*-((5-chlorothiophen-2-yl)sulfonyl)-*N*-(3-(((diphenylmethylene)amino)oxy)-3-oxopropyl)acetamide

Synthesised according to General Procedure 1a. Isolated as a colourless oil (108 mg, 11% yield).

$^1\text{H NMR}$  (400 MHz,  $\text{CDCl}_3$ )  $\delta$  7.59 – 7.55 (m, 2H), 7.53 (d,  $J = 4.1$  Hz, 1H), 7.50 – 7.43 (m, 4H), 7.40 – 7.35 (m, 2H), 7.34 – 7.30 (m, 2H), 6.96 (d,  $J = 4.1$  Hz, 1H), 4.02 – 3.95 (m, 2H), 2.86 – 2.79 (m, 2H), 2.41 (s, 3H).

$^{13}\text{C NMR}$  (101 MHz,  $\text{CDCl}_3$ )  $\delta$  169.9, 168.8, 165.3, 139.8, 137.0, 134.7, 133.9, 132.5, 131.2, 129.9, 129.2, 128.9, 128.6, 128.4, 127.0, 42.6, 33.1, 25.2.

**HRMS** (ESI) Calculated 491.0497  $[\text{M}+\text{H}]^+$ ; found 491.0492.

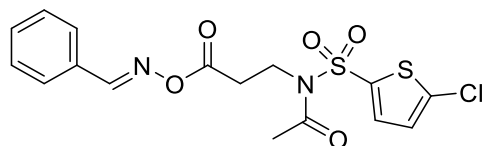

**Oxime variant B** (*E*)-*N*-(3-((benzylideneamino)oxy)-3-oxopropyl)-*N*-((5-chlorothiophen-2-yl)sulfonyl)acetamide

Synthesised according to General Procedure 1a. Isolated as a colourless solid (357 mg, 43% yield).

$^1\text{H NMR}$  (400 MHz,  $\text{CDCl}_3$ )  $\delta$  8.35 (s, 1H), 7.76 – 7.71 (m, 2H), 7.59 (d,  $J = 4.1$  Hz, 1H), 7.51 – 7.47 (m, 1H), 7.46 – 7.41 (m, 2H), 6.98 (d,  $J = 4.1$  Hz, 1H), 4.14 – 4.08 (m, 2H), 3.00 – 2.93 (m, 2H), 2.47 (s, 3H).

$^{13}\text{C NMR}$  (101 MHz,  $\text{CDCl}_3$ )  $\delta$  170.0, 169.0, 156.6, 139.9, 137.0, 134.0, 132.0, 130.0, 129.1, 128.6, 127.0, 42.8, 33.0, 25.2.

**HRMS** (ESI) Calculated 415.0184  $[\text{M}+\text{H}]^+$ ; found 415.0180.

**mp** 109 – 110 °C ( $\text{CHCl}_3$ ).

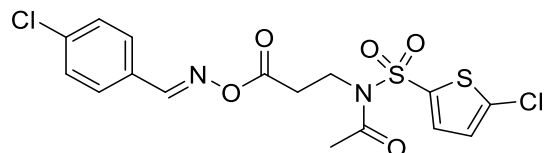

**Oxime variant C** (*E*)-*N*-(3-(((4-chlorobenzylidene)amino)oxy)-3-oxopropyl)-*N*-((5-chlorothiophen-2-yl)sulfonyl)acetamide

Synthesised according to General Procedure 1a. Isolated as a colourless solid (198 mg, 22% yield).



**<sup>1</sup>H NMR (400 MHz, CDCl<sub>3</sub>)** <sup>1</sup>H NMR (400 MHz, CDCl<sub>3</sub>) δ 8.32 (s, 1H), 7.68 (d, *J* = 8.6 Hz, 2H), 7.59 (d, *J* = 4.1 Hz, 1H), 7.42 (d, *J* = 8.5 Hz, 2H), 6.99 (d, *J* = 4.1 Hz, 1H), 4.13 – 4.07 (m, 2H), 2.99 – 2.93 (m, 2H), 2.48 (s, 3H).

**<sup>13</sup>C NMR (101 MHz, CDCl<sub>3</sub>)** δ 170.0, 169.0, 156.6, 139.9, 137.0, 134.0, 132.0, 130.0, 129.1, 128.6, 127.0, 42.8, 33.0, 25.2.

**HRMS (ESI)** Calculated 448.9794 [M+H]<sup>+</sup>; found 448.9792.

**m.p.** 152 – 155 °C (CHCl<sub>3</sub>).

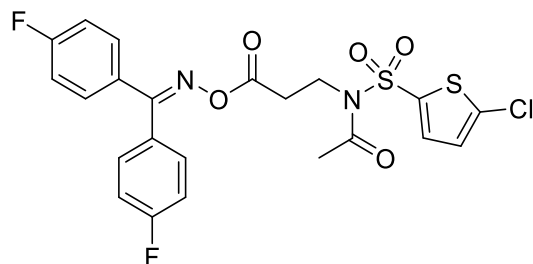

**SM 16a** N-(3-(((bis(4-fluorophenyl)methylene)amino)oxy)-3-oxopropyl)-N-((5-chlorothiophen-2-yl)sulfonyl)acetamide

Synthesised according to General Procedure 1a (6.0 mmol scale). Isolated as a colourless solid (1.35 g, 43 % yield).

**<sup>1</sup>H NMR (400 MHz, CDCl<sub>3</sub>)** δ 7.56 (dd, *J* = 8.9, 5.3 Hz, 2H), 7.54 (d, *J* = 4.1 Hz, 1H), 7.33 (dd, *J* = 8.8, 5.2 Hz, 2H), 7.17 (t, *J* = 8.6 Hz, 2H), 7.07 (dd, *J* = 8.9, 8.3 Hz, 2H), 6.98 (d, *J* = 4.1 Hz, 1H), 4.03 – 3.95 (m, 2H), 2.87 – 2.79 (m, 2H), 2.43 (s, 3H).

**<sup>13</sup>C NMR (101 MHz, CDCl<sub>3</sub>)** 169.9, 168.7, 164.8 (d, *J* = 252.5 Hz), 163.5 (d, *J* = 251.0 Hz), 163.3, 139.9, 137.0, 133.8, 131.3 (d, *J* = 7.9 Hz), 131.3 (d, *J* = 8.3 Hz), 130.7 (d, *J* = 3.2 Hz), 128.1 (d, *J* = 3.7 Hz), 127.0, 115.9 (d, *J* = 21.9 Hz), 115.8 (d, *J* = 21.8 Hz), 42.6, 33.1, 25.2.

**HRMS (ESI):** Calculated 549.0128 [M+Na]<sup>+</sup>; found 549.0123.

**m.p.** 120 – 123 °C (CHCl<sub>3</sub>).

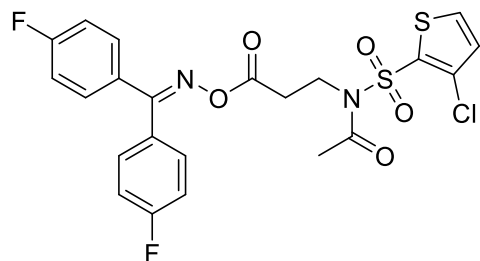

**SM 16b** N-(3-(((bis(4-fluorophenyl)methylene)amino)oxy)-3-oxopropyl)-N-((3-chlorothiophen-2-yl)sulfonyl)acetamide

Synthesised according to general procedure 1a (1.59 mmol scale). Isolated as a colourless viscous oil (354 mg, 42% yield).

**<sup>1</sup>H NMR (400 MHz, CDCl<sub>3</sub>)** δ 7.65 (d, *J* = 5.3 Hz, 1H), 7.60 – 7.52 (m, 2H), 7.32 (dd, *J* = 8.6, 5.4 Hz, 2H), 7.19 – 7.12 (m, 2H), 7.11 – 7.02 (m, 3H), 4.12 – 4.04 (m, 2H), 2.86 – 2.78 (m, 2H), 2.47 (s, 3H).

**<sup>13</sup>C NMR** (101 MHz, CDCl<sub>3</sub>) δ 169.8, 168.5, 164.6 (d, *J* = 252.4 Hz), 163.4 (d, *J* = 250.8 Hz), 163.1, 132.9, 132.1, 131.2 (d, *J* = 8.6 Hz), 131.1 (d, *J* = 8.5 Hz), 130.6 (d, *J* = 3.2 Hz), 130.3, 129.8, 128.0 (d, *J* = 3.6 Hz), 115.7 (d, *J* = 22.0 Hz), 115.7 (d, *J* = 21.8 Hz), 42.7, 32.7, 25.3.

**HRMS** (ESI): Calculated 527.0308 [M+H]<sup>+</sup>; found 527.0305.

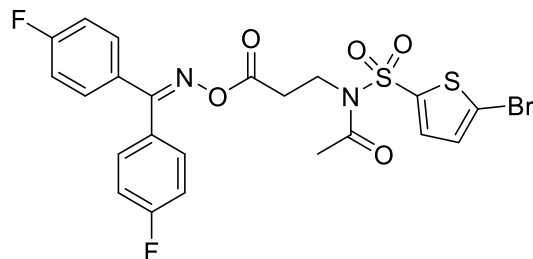

**SM 16c** N-(3-(((bis(4-fluorophenyl)methylene)amino)oxy)-3-oxopropyl)-N-((5-bromothiophen-2-yl)sulfonyl)acetamide

Synthesised according to General Procedure 1a (1.2 mmol scale). Isolated as a colourless solid (287 mg, 42% yield).

**<sup>1</sup>H NMR** (400 MHz, CDCl<sub>3</sub>) δ 7.59 – 7.53 (m, 2H), 7.49 (d, *J* = 4.1 Hz, 1H), 7.35 – 7.30 (m, 2H), 7.20 – 7.14 (m, 2H), 7.11 (d, *J* = 4.0 Hz, 1H), 7.10 – 7.04 (m, 2H), 4.02 – 3.96 (m, 2H), 2.86 – 2.80 (m, 2H), 2.43 (s, 3H).

**<sup>13</sup>C NMR** (101 MHz, CDCl<sub>3</sub>) δ 169.9, 168.7, 164.8 (d, *J* = 252.5 Hz), 163.5 (d, *J* = 251.0 Hz), 163.3, 139.8, 134.5, 131.3 (d, *J* = 8.7 Hz), 131.3 (d, *J* = 8.3 Hz), 130.7 (d, *J* = 3.2 Hz), 130.7, 128.1 (d, *J* = 3.6 Hz), 122.6, 115.9 (d, *J* = 21.9 Hz), 115.8 (d, *J* = 21.7 Hz), 42.6, 33.1, 25.2.

**HRMS** (ESI) Calculated 570.9803 [M+H]<sup>+</sup>; found 570.9802.

**mp** 120 - 121 °C (CHCl<sub>3</sub>).

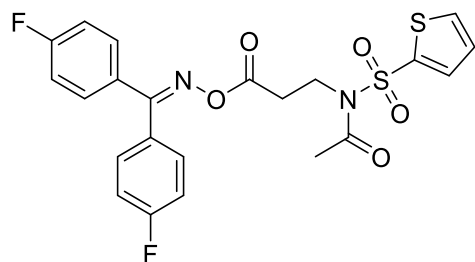

**SM 16d** N-(3-(((bis(4-fluorophenyl)methylene)amino)oxy)-3-oxopropyl)-N-(thiophen-2-ylsulfonyl)acetamide

Synthesised according to General Procedure 1a. Isolated as a colourless solid (438 mg, 44% yield).

**<sup>1</sup>H NMR** (400 MHz, CDCl<sub>3</sub>) δ 7.75 – 7.69 (m, 2H), 7.60 – 7.53 (m, 2H), 7.36 – 7.30 (m, 2H), 7.20 – 7.12 (m, 3H), 7.10 – 7.03 (m, 2H), 4.05 – 3.96 (m, 2H), 2.88 – 2.79 (m, 2H), 2.45 (s, 3H).

**<sup>13</sup>C NMR** (101 MHz, CDCl<sub>3</sub>) δ 170.0, 168.7, 164.7 (d, *J* = 252.3 Hz), 163.5 (d, *J* = 250.8 Hz), 163.1, 139.4, 134.2, 134.0, 131.3 (d, *J* = 8.7 Hz), 131.3 (d, *J* = 8.5 Hz), 130.7 (d, *J* = 3.2 Hz), 128.1 (d, *J* = 3.6 Hz), 127.8, 115.8 (d, *J* = 21.9 Hz), 115.8 (d, *J* = 21.8 Hz), 42.5, 33.1, 25.3.

**HRMS** calculated 515.0517 [M+Na]<sup>+</sup>; found 515.0517.

**mp** 101 - 103 °C (CHCl<sub>3</sub>).

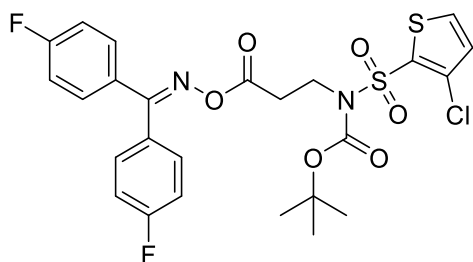

**SM 16e** *tert*-butyl (3-(((bis(4-fluorophenyl)methylene)amino)oxy)-3-oxopropyl)((3-chlorothiophen-2-yl)sulfonyl)carbamate

Synthesised according to General Procedure 1a. Isolated as a colourless solid (362 mg, 31% yield).

**<sup>1</sup>H NMR** (400 MHz, CDCl<sub>3</sub>) δ 7.62 – 7.53 (m, 3H), 7.38 – 7.30 (m, 2H), 7.21 – 7.15 (m, 2H), 7.10 – 7.04 (m, 2H), 7.01 (d, *J* = 5.3 Hz, 1H), 4.23 – 4.17 (m, 2H), 2.92 – 2.86 (m, 2H), 1.37 (s, 9H).

**<sup>13</sup>C NMR** (101 MHz, CDCl<sub>3</sub>) δ 168.5, 164.7 (d, *J* = 252.3 Hz), 163.5 (d, *J* = 250.8 Hz), 163.2, 150.3, 134.4, 131.3 (d, *J* = 8.8 Hz), 131.3 (d, *J* = 8.5 Hz), 131.2, 130.8 (d, *J* = 3.2 Hz), 129.6, 128.8, 128.2 (d, *J* = 3.6 Hz), 115.8 (d, *J* = 21.6 Hz), 115.8 (d, *J* = 21.9 Hz), 85.6, 43.9, 33.8, 28.0.

**HRMS** (ESI) calculated 607.0546 [M+Na]<sup>+</sup>; found 607.0544.

**mp** 109 - 111 °C (CHCl<sub>3</sub>)

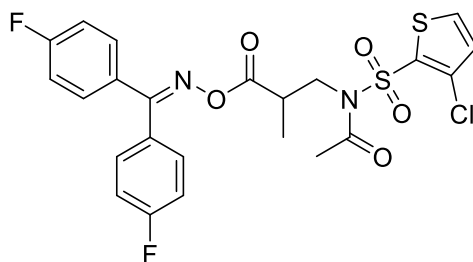

**SM 16f** N-(3-(((bis(4-fluorophenyl)methylene)amino)oxy)-2-methyl-3-oxopropyl)-N-((3-chlorothiophen-2-yl)sulfonyl)acetamide

Synthesised according to General Procedure 1a. Isolated as colourless solid (410 mg, 38% yield).

**<sup>1</sup>H NMR** (400 MHz, CDCl<sub>3</sub>) δ 7.64 (d, *J* = 5.4 Hz, 1H), 7.61 – 7.53 (m, 2H), 7.38 – 7.30 (m, 2H), 7.20 – 7.11 (m, 2H), 7.09 – 7.00 (m, 3H), 4.08 (dd, *J* = 14.5, 7.0 Hz, 1H), 3.95 (dd, *J* = 14.5, 7.2 Hz, 1H), 2.98 (q, *J* = 7.1 Hz, 1H), 2.37 (s, 3H), 1.17 (d, *J* = 7.2 Hz, 3H).

**<sup>13</sup>C NMR** (101 MHz, CDCl<sub>3</sub>) δ 171.4, 170.1, 164.7 (d, *J* = 252.3 Hz), 163.6, 163.4 (d, *J* = 250.8 Hz), 133.4, 132.2, 131.3 (d, *J* = 8.7 Hz), 131.3 (d, *J* = 8.6 Hz), 130.7 (d, *J* = 3.2 Hz), 130.2, 128.2 (d, *J* = 3.6 Hz), 129.6, 115.7 (d, *J* = 21.9 Hz), 115.7 (d, *J* = 21.8 Hz), 49.4, 38.7, 25.1, 14.9.

**HRMS:** (ESI) Calculated 541.0464 [M+H]<sup>+</sup>; found 541.0465.

**mp** 94 - 98 °C (CHCl<sub>3</sub>).

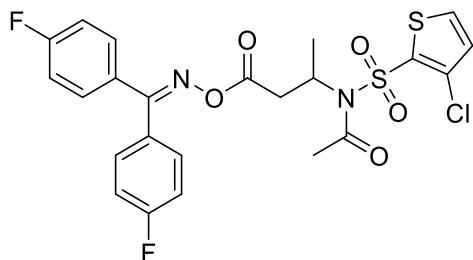

**SM 16g** N-(4-(((bis(4-fluorophenyl)methylene)amino)oxy)-4-oxobutan-2-yl)-N-((3-chlorothiophen-2-yl)sulfonyl)acetamide

Synthesised according to General Procedure 1a. Isolated as a colourless oil (154 mg, 14% yield).

**<sup>1</sup>H NMR** (400 MHz, CDCl<sub>3</sub>) δ 7.66 (d, *J* = 5.3 Hz, 1H), 7.60 – 7.50 (m, 2H), 7.35 – 7.25 (m, 2H), 7.22 – 7.12 (m, 2H), 7.11 – 7.01 (m, 3H), 4.61 (dq, *J* = 9.2, 6.7, 3.7 Hz, 1H), 3.14 (dd, *J* = 16.8, 9.3 Hz, 1H), 2.70 (dd, *J* = 16.8, 3.8 Hz, 1H), 2.52 (s, 3H), 1.39 (d, *J* = 6.7 Hz, 3H).

**<sup>13</sup>C NMR** (101 MHz, CDCl<sub>3</sub>) δ 170.9, 168.7, 164.7 (d, *J* = 252.3 Hz), 163.4 (d, *J* = 251.0 Hz), 163.2, 132.9, 132.4, 131.3 (d, *J* = 7.5 Hz), 131.2 (d, *J* = 7.3 Hz), 130.7 (d, *J* = 3.2 Hz), 130.3, 129.8, 128.0 (d, *J* = 3.6 Hz), 115.8 (d, *J* = 21.9 Hz), 115.8 (d, *J* = 21.9 Hz), 53.4, 38.2, 27.3, 18.5.

**HRMS** Calculated 563.0284 [M+Na]<sup>+</sup>; found 563.0284.

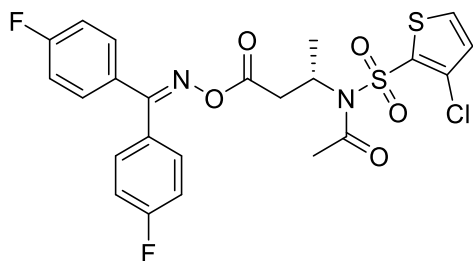

**SM S-16g** (S)-N-(4-(((bis(4-fluorophenyl)methylene)amino)oxy)-4-oxobutan-2-yl)-N-((3-chlorothiophen-2-yl)sulfonyl)acetamide

Synthesised according to General Procedure 1a. Isolated as a colourless oil (237 mg, 22% yield).

**<sup>1</sup>H NMR** (400 MHz, CDCl<sub>3</sub>) δ 7.66 (d, *J* = 5.3 Hz, 1H), 7.61 – 7.50 (m, 2H), 7.34 – 7.25 (m, 2H), 7.22 – 7.12 (m, 2H), 7.11 – 7.00 (m, 3H), 4.61 (dq, *J* = 9.2, 6.7, 3.8 Hz, 1H), 3.14 (dd, *J* = 16.8, 9.3 Hz, 1H), 2.69 (dd, *J* = 16.8, 3.8 Hz, 1H), 2.51 (s, 3H), 1.39 (d, *J* = 6.7 Hz, 3H).

**<sup>13</sup>C NMR** (101 MHz, CDCl<sub>3</sub>) δ 170.9, 168.7, 164.7 (d, *J* = 252.4 Hz), 163.5 (d, *J* = 251.1 Hz), 163.2, 132.9, 132.4, 131.3 (d, *J* = 8.1 Hz), 131.2 (d, *J* = 8.1 Hz), 130.7 (d, *J* = 3.3 Hz), 130.3, 129.8, 128.0 (d, *J* = 3.6 Hz), 115.8 (d, *J* = 21.8 Hz), 115.8 (d, *J* = 21.8 Hz), 53.4, 38.2, 27.3, 18.5.

**HRMS** (ESI) Calculated 563.0284 [M+Na]<sup>+</sup>; found 563.0284.

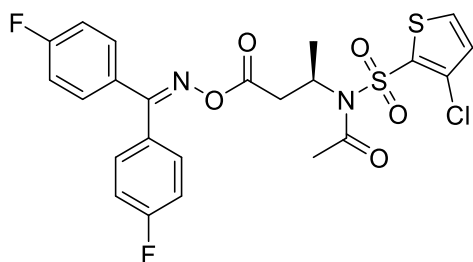

**SM R-16g** (*R*)-N-(4-(((bis(4-fluorophenyl)methylene)amino)oxy)-4-oxobutan-2-yl)-N-((3-chlorothiophen-2-yl)sulfonyl)acetamide

Synthesised according to General Procedure 1a. Isolated as a colourless oil (209 mg, 19% yield).

**<sup>1</sup>H NMR** (400 MHz, CDCl<sub>3</sub>) δ 7.66 (d, *J* = 5.3 Hz, 1H), 7.59 – 7.50 (m, 2H), 7.34 – 7.25 (m, 2H), 7.22 – 7.12 (m, 2H), 7.11 – 7.00 (m, 3H), 4.61 (dt, *J* = 13.4, 6.7, 3.7, 3.3 Hz, 1H), 3.14 (dd, *J* = 16.8, 9.3 Hz, 1H), 2.69 (dd, *J* = 16.8, 3.8 Hz, 1H), 2.51 (s, 3H), 1.39 (d, *J* = 6.7 Hz, 3H).

**<sup>13</sup>C NMR** (101 MHz, CDCl<sub>3</sub>) δ 170.9, 168.7, 164.7 (d, *J* = 252.4 Hz), 163.5 (d, *J* = 251.1 Hz), 163.2, 132.9, 132.4, 131.3 (d, *J* = 8.2 Hz), 131.2 (d, *J* = 8.1 Hz), 130.7 (d, *J* = 3.4 Hz), 130.3, 129.8, 128.0 (d, *J* = 3.6 Hz), 115.8 (d, *J* = 21.8 Hz), 115.8 (d, *J* = 21.8 Hz), 53.4, 38.2, 27.3, 18.5.

**HRMS** (ESI) Calculated 541.0465 [M+H]<sup>+</sup>; found 541.0460.

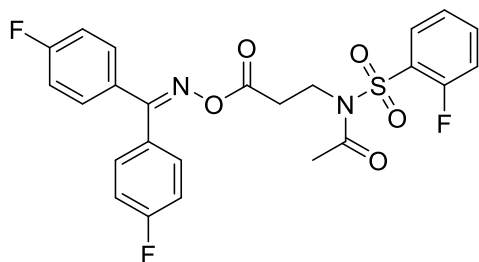

**SM 16h** N-(3-(((bis(4-fluorophenyl)methylene)amino)oxy)-3-oxopropyl)-N-((2-fluorophenyl)sulfonyl)acetamide

Synthesised according to General Procedure 1a. Isolated as colourless solid (456 mg, 45% yield).

**<sup>1</sup>H NMR** (400 MHz, CDCl<sub>3</sub>) δ 7.97 (ddd, *J* = 8.0, 7.1, 1.8 Hz, 1H), 7.68 (dddd, *J* = 8.3, 7.5, 5.0, 1.8 Hz, 1H), 7.59 – 7.51 (m, 2H), 7.38 – 7.30 (m, 3H), 7.27 – 7.22 (m, 1H), 7.20 – 7.11 (m, 2H), 7.10 – 7.01 (m, 2H), 4.04 – 3.96 (m, 2H), 2.87 – 2.79 (m, 2H), 2.36 (s, 3H).

**<sup>13</sup>C NMR** (101 MHz, CDCl<sub>3</sub>) δ 170.0, 168.7, 164.6 (d, *J* = 252.3 Hz), 163.4 (d, *J* = 250.8 Hz), 163.1, 158.9 (d, *J* = 256.8 Hz), 136.7 (d, *J* = 8.8 Hz), 131.3 (d, *J* = 2.6 Hz), 131.2 (d, *J* = 2.3 Hz), 131.0, 130.7 (d, *J* = 3.2 Hz), 128.0 (d, *J* = 3.6 Hz), 126.7 (d, *J* = 13.4 Hz), 124.9 (d, *J* = 3.9 Hz), 117.7 (d, *J* = 20.9 Hz), 115.8 (d, *J* = 21.9 Hz), 115.7 (d, *J* = 21.8 Hz), 42.1, 32.9, 25.1.

**HRMS** (ESI) Calculated 527.0859 [M+Na]<sup>+</sup>; found 527.0857.

**mp** 85 - 88 °C (CHCl<sub>3</sub>).

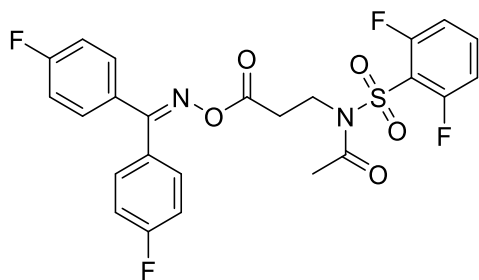

**SM 16i** N-(3-(((bis(4-fluorophenyl)methylene)amino)oxy)-3-oxopropyl)-N-((2,6-difluorophenyl)sulfonyl)acetamide

Synthesised according to General Procedure 1a. Isolated as a colourless solid (377 mg, 36% yield).

**<sup>1</sup>H NMR** (400 MHz, CDCl<sub>3</sub>) δ 7.68 – 7.56 (m, 1H), 7.55 (dd, *J* = 4.9, 1.7 Hz, 2H), 7.37 – 7.28 (m, 2H), 7.21 – 7.10 (m, 2H), 7.12 – 7.03 (m, 4H), 4.09 – 4.01 (m, 2H), 2.89 – 2.81 (m, 2H), 2.39 (s, 3H).

**<sup>13</sup>C NMR** (101 MHz, CDCl<sub>3</sub>) δ 170.1, 168.6, 164.7 (d, *J* = 252.4 Hz), 163.5 (d, *J* = 250.8 Hz), 163.2, 159.6 (dd, *J* = 260.8, 3.3 Hz), 136.2 (t, *J* = 11.2 Hz), 131.3 (d, *J* = 8.7 Hz), 131.2 (d, *J* = 8.5 Hz), 130.7 (d, *J* = 3.2 Hz), 128.1 (d, *J* = 3.6 Hz), 117.3 (t, *J* = 15.1 Hz), 115.8 (d, *J* = 21.9 Hz), 115.7 (d, *J* = 21.9 Hz), 114.0 – 113.2 (m), 42.4, 33.0, 24.9.

**HRMS** (ESI) Calculated 545.0765 [M+Na]<sup>+</sup>; found 545.0765.

**mp** 121 – 122 °C (CHCl<sub>3</sub>).

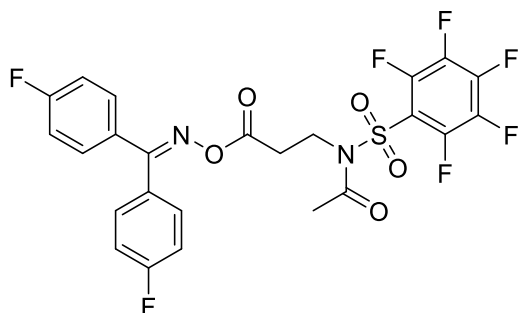

**SM 16j** N-(3-(((bis(4-fluorophenyl)methylene)amino)oxy)-3-oxopropyl)-N-((perfluorophenyl)sulfonyl)acetamide

Synthesised according to General Procedure 1a. Isolated as a colourless solid (252 mg, 22% yield).

**<sup>1</sup>H NMR** (400 MHz, CDCl<sub>3</sub>) δ 7.58 – 7.53 (m, 2H), 7.35 – 7.30 (m, 2H), 7.20 – 7.14 (m, 2H), 7.10 – 7.04 (m, 2H), 4.12 – 4.03 (m, 2H), 2.91 – 2.83 (m, 2H), 2.40 (s, 3H).

**<sup>13</sup>C NMR** (101 MHz, CDCl<sub>3</sub>) δ 170.2, 168.5, 164.8 (d, *J* = 252.9 Hz), 163.5 (d, *J* = 251.1 Hz), 163.5, 146.6 – 146.1 (m), 143.9 – 143.5 (m), 139.6 – 139.1 (m), 137.1 – 136.6 (m), 131.3 (d, *J* = 8.7 Hz), 131.2 (d, *J* = 8.5 Hz), 130.6 (d, *J* = 3.2 Hz), 128.0 (d, *J* = 3.6 Hz), 115.5 – 115.2 (m), 115.9 (d, *J* = 21.9 Hz), 115.8 (d, *J* = 21.9 Hz), 115.6 – 115.1 (m), 42.9, 33.1, 24.7.

**HRMS** (ESI) Calculated 577.0663 [M+H]<sup>+</sup>; found 577.0663.

**mp** 44 – 46 °C (CHCl<sub>3</sub>).

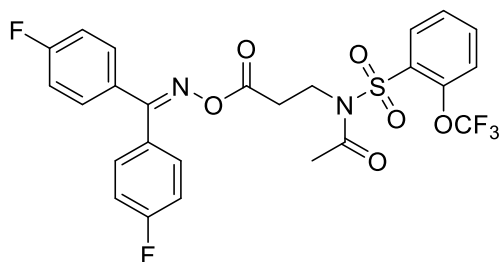

**SM 16k** N-(3-(((bis(4-fluorophenyl)methylene)amino)oxy)-3-oxopropyl)-N-((2-(trifluoromethoxy)phenyl)sulfonyl)acetamide

Synthesised according to General Procedure 1a. Isolated as a colourless oil (353 mg, 31% yield).

**<sup>1</sup>H NMR** (400 MHz, CDCl<sub>3</sub>) δ 8.12 (dd, *J* = 7.9, 1.7 Hz, 1H), 7.72 (ddd, *J* = 8.3, 7.6, 1.7 Hz, 1H), 7.60 – 7.52 (m, 2H), 7.52 – 7.41 (m, 2H), 7.37 – 7.29 (m, 2H), 7.20 – 7.11 (m, 2H), 7.11 – 7.02 (m, 2H), 4.05 – 3.97 (m, 2H), 2.87 – 2.79 (m, 2H), 2.34 (s, 3H).

**<sup>13</sup>C NMR** (101 MHz, CDCl<sub>3</sub>) δ 169.9, 168.6, 164.6 (d, *J* = 252.2 Hz), 163.4 (d, *J* = 250.8 Hz), 163.1, 146.2 – 146.1 (m), 136.0, 132.1, 131.3 (d, *J* = 1.8 Hz), 131.2 (d, *J* = 1.5 Hz), 130.6 (d, *J* = 3.2 Hz), 130.2, 127.9 (d, *J* = 3.6 Hz), 126.6, 120.2 (q, *J* = 262.4 Hz), 120.0 (q, *J* = 2.2 Hz), 115.8 (d, *J* = 7.4 Hz), 115.6 (d, *J* = 7.4 Hz), 42.1, 32.9, 24.9.

**HRMS** (ESI) Calculated [M+H]<sup>+</sup> 571.0957; found 571.0950.

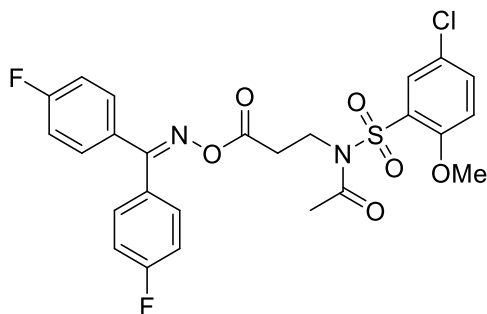

**SM 16I** N-(3-(((bis(4-fluorophenyl)methylene)amino)oxy)-3-oxopropyl)-N-((5-chloro-2-methoxyphenyl)sulfonyl)acetamide

Synthesised according to General Procedure 1a. Isolated as a colourless solid (419 mg, 38% yield).

**<sup>1</sup>H NMR** (400 MHz, CDCl<sub>3</sub>) δ 7.95 (d, *J* = 2.7 Hz, 1H), 7.61 – 7.51 (m, 3H), 7.36 – 7.28 (m, 2H), 7.20 – 7.11 (m, 2H), 7.11 – 7.02 (m, 2H), 6.99 (d, *J* = 8.9 Hz, 1H), 3.99 – 3.92 (m, 2H), 3.90 (s, 3H), 2.84 – 2.75 (m, 2H), 2.38 (s, 3H).

**<sup>13</sup>C NMR** (101 MHz, CDCl<sub>3</sub>) δ 170.5, 169.0, 164.7 (d, *J* = 252.2 Hz), 163.4 (d, *J* = 250.9 Hz), 163.0, 155.4, 135.9, 131.3 (d, *J* = 8.3 Hz), 131.2 (d, *J* = 8.3 Hz), 130.9, 130.8 (d, *J* = 3.2 Hz), 128.1 (d, *J* = 3.7 Hz), 127.4, 126.1, 115.8 (d, *J* = 21.9 Hz), 115.7 (d, *J* = 21.8 Hz), 114.0, 56.7, 42.0, 32.7, 25.3.

**HRMS** (ESI) Calculated 551.0849 [M+H]<sup>+</sup>; found 551.0850.

**mp** 156 – 158 °C (CHCl<sub>3</sub>).

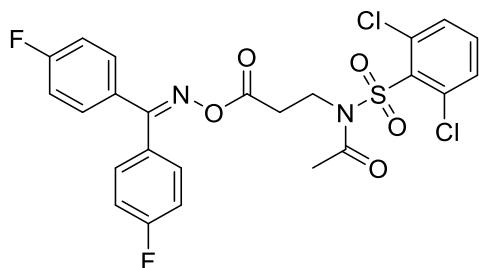

**SM 16m** *N*-(3-(((bis(4-fluorophenyl)methylene)amino)oxy)-3-oxopropyl)-*N*-((2,6-dichlorophenyl)sulfonyl)acetamide

Synthesised according to General Procedure 1a. Isolated as a colourless solid (303 mg, 27% yield).

**<sup>1</sup>H NMR** (400 MHz, CDCl<sub>3</sub>) δ 7.59 – 7.53 (m, 2H), 7.52 – 7.48 (m, 2H), 7.42 (dd, *J* = 8.9, 7.0 Hz, 1H), 7.35 – 7.30 (m, 2H), 7.19 – 7.13 (m, 2H), 7.10 – 7.03 (m, 2H), 4.11 – 4.03 (m, 2H), 2.91 – 2.82 (m, 2H), 2.33 (s, 3H).

**<sup>13</sup>C NMR** (101 MHz, CDCl<sub>3</sub>) δ 170.2, 168.6, 164.8 (d, *J* = 252.3 Hz), 163.5 (d, *J* = 251.0 Hz), 163.3, 135.7, 134.7, 133.8, 132.0, 131.3 (d, *J* = 8.8 Hz), 131.3 (d, *J* = 8.5 Hz), 130.7 (d, *J* = 3.2 Hz), 128.1 (d, *J* = 3.6 Hz), 115.8 (d, *J* = 21.9 Hz), 115.8 (d, *J* = 22.0 Hz), 42.6, 32.8, 24.8.

**HRMS** (ESI) Calculated 577.0177 [M+Na]<sup>+</sup>; found 577.0174.

**mp** 50 – 52 °C (CHCl<sub>3</sub>).

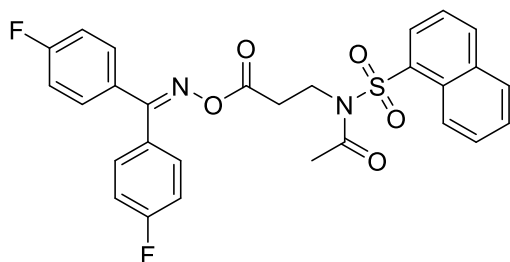

**SM 16n** *N*-(3-(((bis(4-fluorophenyl)methylene)amino)oxy)-3-oxopropyl)-*N*-(naphthalen-1-ylsulfonyl)acetamide

Synthesised according to General Procedure 1a. Isolated as a colourless solid (226 mg, 11% yield),

**<sup>1</sup>H NMR** (400 MHz, CDCl<sub>3</sub>) δ 8.42 – 8.37 (m, 1H), 8.15 (ddd, *J* = 7.5, 4.8, 1.1 Hz, 2H), 8.01 – 7.97 (m, 1H), 7.72 (ddd, *J* = 8.6, 6.9, 1.5 Hz, 1H), 7.65 (ddd, *J* = 8.1, 6.9, 1.2 Hz, 1H), 7.61 – 7.52 (m, 3H), 7.35 – 7.29 (m, 2H), 7.19 – 7.11 (m, 2H), 7.10 – 7.03 (m, 2H), 4.18 – 4.08 (m, 2H), 2.88 – 2.80 (m, 2H), 2.37 (s, 3H).

**<sup>13</sup>C NMR** (101 MHz, CDCl<sub>3</sub>) δ 170.4, 168.8, 164.8 (d, *J* = 252.3 Hz), 163.5 (d, *J* = 251.0 Hz), 163.2, 135.7, 134.6, 134.1, 131.3 (d, *J* = 8.7 Hz), 131.3 (d, *J* = 8.4 Hz), 130.8 (d, *J* = 3.2 Hz), 129.7, 129.5, 129.2, 128.2, 128.1 (d, *J* = 3.6 Hz), 127.6, 124.2, 123.8, 115.8 (d, *J* = 21.9 Hz), 115.8 (d, *J* = 21.9 Hz), 42.4, 32.8, 25.5.

**HRMS** (ESI) calculated 559.1110 [M+Na]<sup>+</sup>; found 559.1117.

**mp** 45 – 47 °C (CHCl<sub>3</sub>).



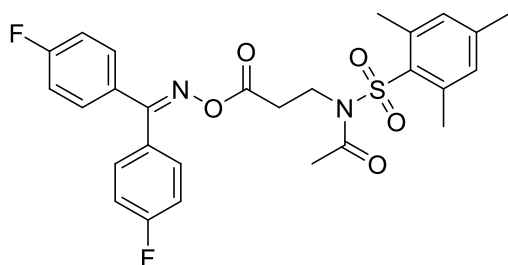

**SM 16o** N-(3-(((bis(4-fluorophenyl)methylene)amino)oxy)-3-oxopropyl)-N-(mesitylsulfonyl)acetamide

Synthesised according to General Procedure 1a. Isolated as a colourless solid (308 mg, 29% yield),

**<sup>1</sup>H NMR** (400 MHz, CDCl<sub>3</sub>) δ 7.59 – 7.53 (m, 2H), 7.35 – 7.29 (m, 2H), 7.20 – 7.13 (m, 2H), 7.10 – 7.04 (m, 2H), 6.99 (s, 2H), 4.02 – 3.96 (m, 2H), 2.83 – 2.77 (m, 2H), 2.55 (s, 6H), 2.32 (s, 3H), 2.24 (s, 3H).

**<sup>13</sup>C NMR** (101 MHz, CDCl<sub>3</sub>) δ 170.2, 168.8, 164.8 (d, *J* = 252.4 Hz), 163.2, 163.5 (d, *J* = 251.0 Hz), 144.2, 140.0, 133.4, 132.6, 131.3 (d, *J* = 8.6 Hz), 131.3 (d, *J* = 8.5 Hz), 130.8 (d, *J* = 3.3 Hz), 128.1 (d, *J* = 3.6 Hz), 115.8 (d, *J* = 21.9 Hz), 115.8 (d, *J* = 21.9 Hz), 41.4, 32.5, 24.7, 22.6, 21.2.

**HRMS** (ESI): Calculated 551.1420 [M+Na]<sup>+</sup>; found 551.1420.

**mp** 127 – 128 °C (CHCl<sub>3</sub>).

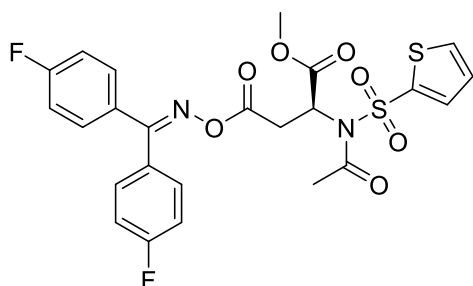

**SM 16p** methyl (S)-4-(((bis(4-fluorophenyl)methylene)amino)oxy)-4-oxo-2-(N-(thiophen-2-ylsulfonyl)acetamido)butanoate

Synthesised according to General Procedure 1b. Isolated as a colourless oil (171 mg, 8% yield).

**<sup>1</sup>H NMR** (400 MHz, CDCl<sub>3</sub>) δ 7.84 (dd, *J* = 3.8, 1.4 Hz, 1H), 7.76 (dd, *J* = 5.0, 1.4 Hz, 1H), 7.61 – 7.50 (m, 2H), 7.38 – 7.28 (m, 2H), 7.21 – 7.11 (m, 3H), 7.11 – 7.01 (m, 2H), 5.35 (dd, *J* = 8.7, 4.1 Hz, 1H), 3.64 (s, 3H), 3.49 (dd, *J* = 16.9, 8.7 Hz, 1H), 2.67 (dd, *J* = 16.9, 4.2 Hz, 1H), 2.44 (s, 3H).

**<sup>13</sup>C NMR** (101 MHz, CDCl<sub>3</sub>) δ 170.2, 168.6, 168.1, 165.3 (d, *J* = 125.0 Hz), 163.3, 162.8 (d, *J* = 123.9 Hz), 138.7, 135.3, 134.7, 131.4 (d, *J* = 2.2 Hz), 131.3 (d, *J* = 1.9 Hz), 130.7 (d, *J* = 3.2 Hz), 128.0 (d, *J* = 3.7 Hz), 127.8, 115.9 (d, *J* = 4.4 Hz), 115.7 (d, *J* = 4.3 Hz), 56.2, 53.1, 35.0, 25.2.

**HRMS** (ESI): Calculated 551.0753 [M+H]<sup>+</sup>; found 551.0756.

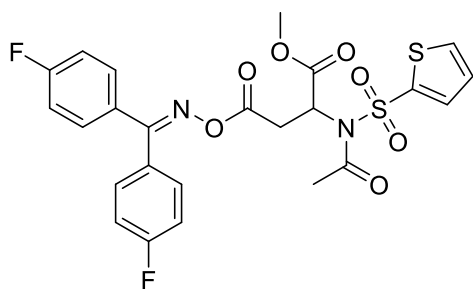

**SM rac-16p** methyl 4-(((bis(4-fluorophenyl)methylene)amino)oxy)-4-oxo-2-(N-(thiophen-2-ylsulfonyl)acetamido)butanoate

Synthesised according to General Procedure 1b. Isolated as a colourless solid (194 mg, 9% yield).

**<sup>1</sup>H NMR** (400 MHz, CDCl<sub>3</sub>) δ 7.84 (dd, *J* = 3.9, 1.4 Hz, 1H), 7.76 (dd, *J* = 5.0, 1.4 Hz, 1H), 7.61 – 7.52 (m, 2H), 7.38 – 7.30 (m, 2H), 7.22 – 7.12 (m, 3H), 7.11 – 7.02 (m, 2H), 5.36 (dd, *J* = 8.7, 4.2 Hz, 1H), 3.64 (s, 3H), 3.50 (d d, *J* = 17.0, 8.7 Hz, 1H), 2.67 (dd, *J* = 16.9, 4.2 Hz, 1H), 2.44 (s, 3H).

**<sup>13</sup>C NMR** (101 MHz, CDCl<sub>3</sub>) δ 170.3, 168.6, 168.2, 164.7 (d, *J* = 252.3 Hz), 163.5 (d, *J* = 250.8 Hz), 163.3, 138.7, 135.3, 134.7, 131.3 (d, *J* = 8.9 Hz), 131.3 (d, *J* = 8.5 Hz), 130.7 (d, *J* = 3.3 Hz), 128.0 (d, *J* = 3.7 Hz), 127.8, 115.8 (d, *J* = 21.9 Hz), 115.8 (d, *J* = 21.8 Hz), 56.2, 53.1, 35.0, 25.2.

**HRMS** (ESI) Calculated 573.0573 [M+Na]<sup>+</sup>; found 573.0572.

**mp** 52 – 56 °C (CHCl<sub>3</sub>).

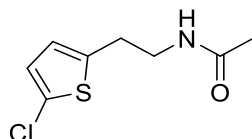

**17a** *N*-(2-(5-chlorothiophen-2-yl)ethyl)acetamide

Synthesised according to General Procedure 2a. Isolated as an orange oil (23 mg, 56% yield).

**<sup>1</sup>H NMR** (400 MHz, CDCl<sub>3</sub>) δ 6.73 (d, *J* = 3.7 Hz, 1H), 6.59 (dt, *J* = 3.7, 1.0 Hz, 1H), 5.77 (bs, 1H), 3.46 (dd, *J* = 6.5, 6.5 Hz, 2H), 2.92 (td, *J* = 6.7, 1.0 Hz, 2H), 1.96 (s, 3H).

**<sup>13</sup>C NMR** (101 MHz, CDCl<sub>3</sub>) δ 170.3, 140.4, 127.9, 126.1, 124.9, 40.7, 30.4, 23.4.

**HRMS** (ESI) Calculated 204.0244 [M+H]<sup>+</sup>; found 204.0240.

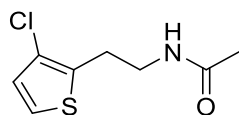

**17b** *N*-(2-(3-chlorothiophen-2-yl)ethyl)acetamide

Synthesised according to General Procedure 2a. Isolated as a yellow oil (33 mg, 81% yield).

**<sup>1</sup>H NMR** (400 MHz, CDCl<sub>3</sub>) δ 7.13 (d, *J* = 5.4 Hz, 1H), 6.87 (d, *J* = 5.4 Hz, 1H), 5.96 (bs, 1H), 3.48 (q, *J* = 6.4 Hz, 2H), 3.00 (t, *J* = 6.6 Hz, 2H), 1.96 (s, 3H).

**<sup>13</sup>C NMR** <sup>13</sup>C NMR (101 MHz, CDCl<sub>3</sub>) δ 170.9, 133.6, 127.8, 123.3, 123.2, 40.2, 27.6, 23.2.

**HRMS** (ESI) Calculated 204.0244 [M+H]<sup>+</sup>; found 204.0242.

**17b** also synthesised with thioxanthone catalyst (10 mol%), giving 41% NMR yield using 1, 3, 5-trimethoxybenzene as an internal standard.

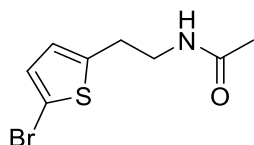

**17c** *N*-(2-(5-bromothiophen-2-yl)ethyl)acetamide

Synthesised according to General Procedure 2a. As an orange oil in (26 mg, 52% yield).

**<sup>1</sup>H NMR** <sup>1</sup>H NMR (400 MHz, CDCl<sub>3</sub>) δ 6.88 (d, *J* = 3.7 Hz, 1H), 6.61 – 6.57 (m, 1H), 5.69 (bs, 1H), 3.47 (dd, *J* = 6.4, 6.4 Hz, 2H), 2.95 (td, *J* = 6.6, 1.0 Hz, 2H), 1.96 (s, 3H).

**<sup>13</sup>C NMR** (101 MHz, CDCl<sub>3</sub>) δ 170.3, 143.3, 129.9, 126.0, 110.0, 40.7, 30.4, 23.4.

**HRMS** (ESI) Calculated 269.9559 [M+Na]<sup>+</sup>; found 269.9554.

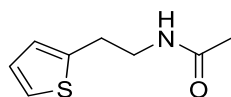

**17d** *N*-(2-(thiophen-2-yl)ethyl)acetamide

Synthesised according to general procedure 2a. Isolated as a yellow oil (20 mg, 59% yield).

**<sup>1</sup>H NMR** (400 MHz, CDCl<sub>3</sub>) δ 7.15 (dd, *J* = 5.1, 1.2 Hz, 1H), 6.94 (dd, *J* = 5.1, 3.4 Hz, 1H), 6.88 – 6.78 (m, 1H), 3.51 (q, *J* = 6.4 Hz, 2H), 3.03 (td, *J* = 6.7, 0.9 Hz, 2H), 1.96 (s, 3H).

**<sup>13</sup>C NMR** (101 MHz, CDCl<sub>3</sub>) δ 170.9, 141.2, 127.2, 125.5, 124.1, 41.2, 29.8, 23.1.

**HRMS** (ESI) Calculated 170.0634 [M+H]<sup>+</sup>; found 170.0634.

**17d** was also synthesised according to general procedure 2b. Isolated as a yellow oil (79 mg, 47% yield).

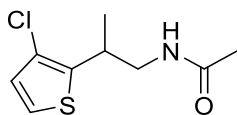

**17f** *N*-(2-(3-chlorothiophen-2-yl)propyl)acetamide

Synthesised according to general procedure 2a. Isolated as a yellow oil (41 mg, 94% yield).

**<sup>1</sup>H NMR** (400 MHz, CDCl<sub>3</sub>) δ 7.16 (dd, *J* = 5.4, 0.6 Hz, 1H), 6.86 (d, *J* = 5.3 Hz, 1H), 5.72 (bs, 1H), 3.62 (ddd, *J* = 13.3, 6.8, 5.7 Hz, 1H), 3.52 – 3.41 (m, 1H), 3.19 (ddd, *J* = 13.5, 8.4, 5.3 Hz, 1H), 1.91 (s, 3H), 1.29 (d, *J* = 7.0 Hz, 3H).

**<sup>13</sup>C NMR** (101 MHz, CDCl<sub>3</sub>) δ 170.5, 140.3, 127.8, 122.9, 122.4, 46.2, 33.6, 23.3, 19.5.

**HRMS** (ESI) Calculated 218.0401 [M+H<sup>+</sup>]; found 218.0398.

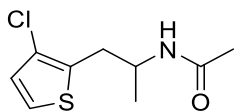

**17g** *N*-(1-(3-chlorothiophen-2-yl)propan-2-yl)acetamide

Synthesised according to General Procedure 2a. Isolated as a yellow oil (37 mg, 85% yield).

<sup>1</sup>H NMR (400 MHz, CDCl<sub>3</sub>) δ 7.15 (d, *J* = 5.3 Hz, 1H), 6.87 (d, *J* = 5.4 Hz, 1H), 5.61 (bd, *J* = 8.3 Hz, 1H), 4.32 – 4.18 (m, 1H), 3.02 (dd, *J* = 14.7, 5.9 Hz, 1H), 2.94 (dd, *J* = 14.7, 6.2 Hz, 1H), 1.94 (s, 3H), 1.15 (d, *J* = 6.7 Hz, 3H).

<sup>13</sup>C NMR (101 MHz, CDCl<sub>3</sub>) δ 169.6, 132.7, 127.6, 123.8, 123.5, 46.1, 33.7, 23.6, 20.0.

HRMS (ESI) Calculated 218.0401 [M+H]<sup>+</sup>; found 218.0404.

Chiral HPLC CHIRALPAK AS-H column, 20:80 *i*PrOH:Hexane, 1.0 mL/min, 20 °C, 235 nm, 14.141 min (*L* isomer, 48%) and 17.736 min (*D* isomer, 52%).

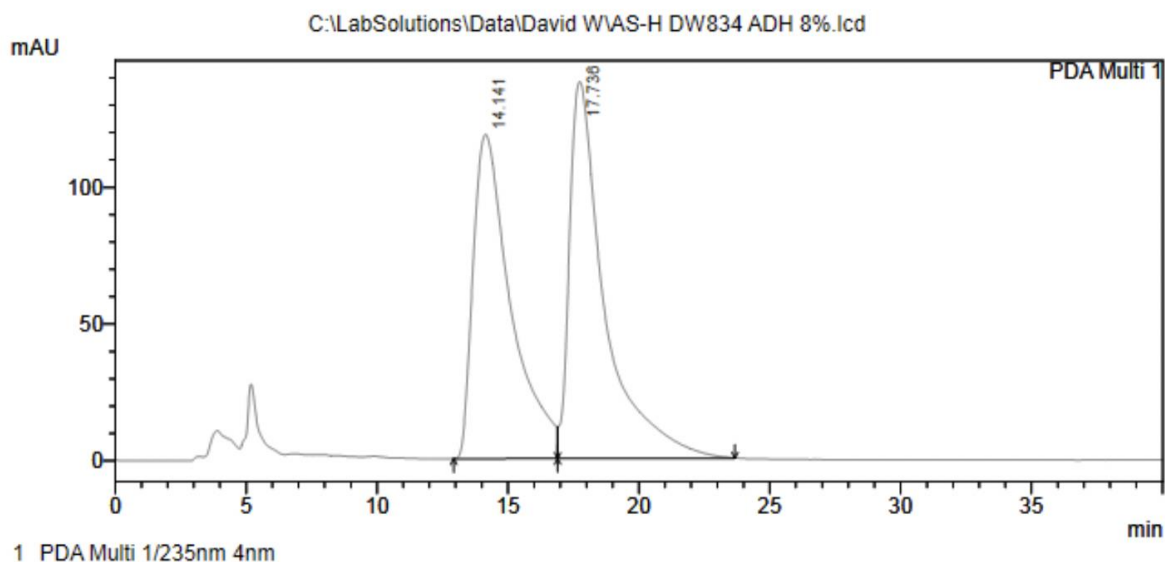

PeakTable

PDA Ch1 235nm 4nm

| Peak# | Ret. Time | Area     | Height | Area %  | Height % |
|-------|-----------|----------|--------|---------|----------|
| 1     | 14.141    | 11870826 | 118543 | 48.020  | 46.250   |
| 2     | 17.736    | 12849874 | 137763 | 51.980  | 53.750   |
| Total |           | 24720700 | 256306 | 100.000 | 100.000  |

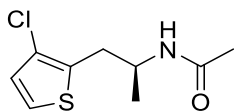

**S-17g** (S)-N-(2-(3-chlorothiophen-2-yl)propyl)acetamide

Synthesised according to General Procedure 2a. Isolated as a yellow solid (34 mg, 78%).

$^1\text{H NMR}$  (400 MHz,  $\text{CDCl}_3$ )  $\delta$  7.14 (d,  $J = 5.4$  Hz, 1H), 6.86 (d,  $J = 5.4$  Hz, 1H), 5.69 (bd,  $J = 6.5$  Hz, 1H), 4.29 – 4.19 (m, 1H), 3.01 (dd,  $J = 14.7, 5.9$  Hz, 1H), 2.93 (dd,  $J = 14.7, 6.2$  Hz, 1H), 1.93 (s, 3H), 1.14 (d,  $J = 6.8$  Hz, 3H).

$^{13}\text{C NMR}$  (101 MHz,  $\text{CDCl}_3$ )  $\delta$  169.7, 132.7, 127.5, 123.8, 123.5, 46.1, 33.7, 23.6, 20.0.

**HRMS** (ESI) calculated 218.0401  $[\text{M}+\text{H}]^+$ ; found 218.0403.

**mp** 72 – 75 °C ( $\text{CHCl}_3$ ).

**Specific rotation:**  $[\alpha]_{\text{D}}^{23} -32.9$  ( $c = 0.30, \text{CHCl}_3$ ).

**Chiral HPLC** CHIRALPAK AS-H column, 20:80 *i*PrOH:Hexane, 1.0 mL/min, 20 °C, 235 nm, 14.309 min

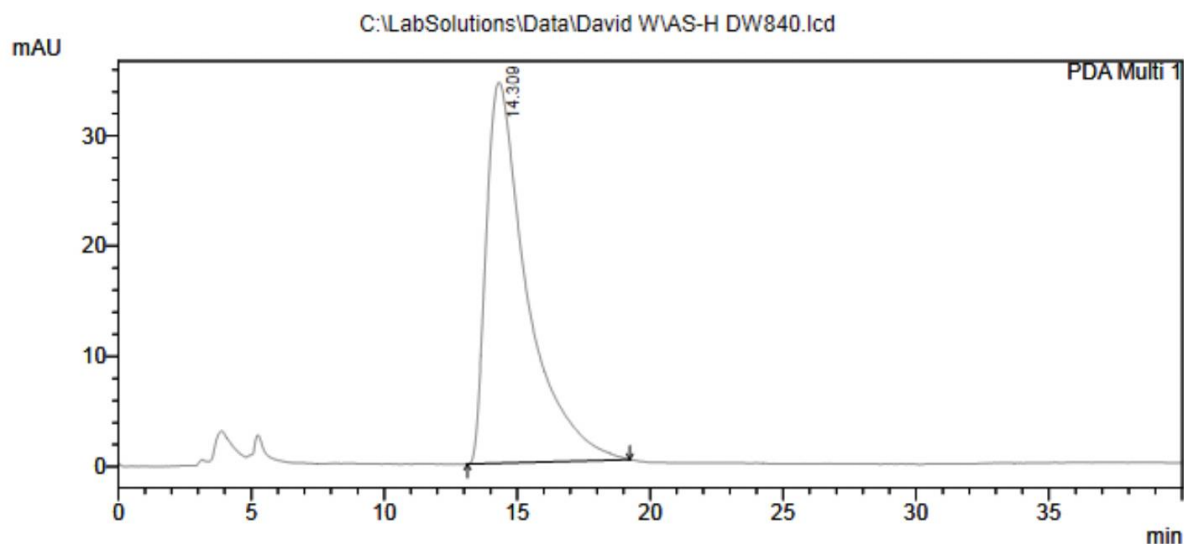

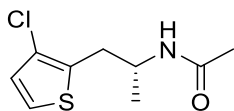

**R-17g** (*R*)-*N*-(1-(3-chlorothiophen-2-yl)propan-2-yl)acetamide

Synthesised according to General Procedure 2a. Isolated as a yellow solid (36 mg, 83% yield).

**<sup>1</sup>H NMR** <sup>1</sup>H NMR (400 MHz, CDCl<sub>3</sub>) δ 7.14 (d, *J* = 5.4 Hz, 1H), 6.87 (d, *J* = 5.4 Hz, 1H), 5.63 (bd, *J* = 8.3 Hz, 1H), 4.30 – 4.19 (m, 1H), 3.01 (dd, *J* = 14.7, 5.9 Hz, 1H), 2.93 (dd, *J* = 14.7, 6.2 Hz, 1H), 1.94 (s, 3H), 1.15 (d, *J* = 6.8 Hz, 3H).

**<sup>13</sup>C NMR** (101 MHz, CDCl<sub>3</sub>) δ 169.6, 132.7, 127.6, 123.8, 123.5, 46.1, 33.7, 23.6, 20.0.

**HRMS** Calculated 218.0401 [M+H]<sup>+</sup>; found 218.0403

**mp** 71 – 74 °C.

**Specific rotation:** [α]<sub>D</sub><sup>22</sup> +27.6 (c = 0.30, CHCl<sub>3</sub>).

**Chiral HPLC** CHIRALPAK AS-H column, 20:80 *i*PrOH:Hexane, 1.0 mL/min, 20 °C, 235 nm, 18.030 min

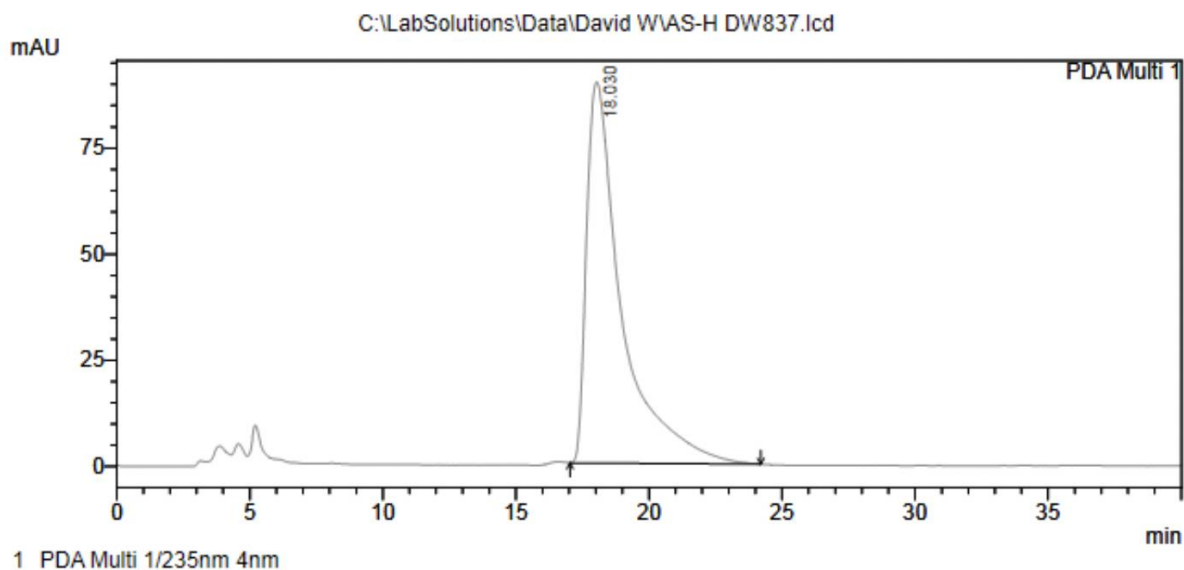

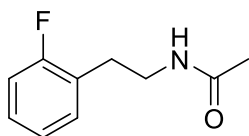

**17h** *N*-(2-fluorophenethyl)acetamide

Synthesised according to General Procedure 2a. Isolated as a yellow oil (14 mg, 39% yield).

**<sup>1</sup>H NMR** (400 MHz, CDCl<sub>3</sub>) δ 7.25 – 7.16 (m, 2H), 7.11 – 6.99 (m, 2H), 5.63 (bs, 1H), 3.49 (q, *J* = 6.7 Hz, 2H), 2.85 (td, *J* = 6.9, 1.2 Hz, 2H), 1.94 (s, 3H).

**<sup>13</sup>C NMR** (101 MHz, CDCl<sub>3</sub>) δ 170.33, 161.37 (d, *J* = 244.8 Hz), 131.24 (d, *J* = 4.9 Hz), 128.47 (d, *J* = 8.1 Hz), 125.90 (d, *J* = 15.9 Hz), 124.35 (d, *J* = 3.6 Hz), 115.48 (d, *J* = 22.0 Hz), 39.75, 29.23 (d, *J* = 1.7 Hz), 23.43.

**HRMS** (ESI) Calculated 182.0976 [M+H]<sup>+</sup>; found 182.0976.

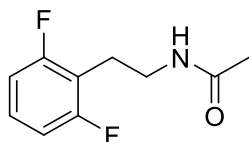

**17i** *N*-(2,6-difluorophenethyl)acetamide

Synthesised according to General Procedure 2a. Isolated as an orange oil (33 mg, 83% yield).

**<sup>1</sup>H NMR** (400 MHz, CDCl<sub>3</sub>) δ 7.22 – 7.10 (m, 1H), 6.85 (ddd, *J* = 8.0, 6.7, 1.1 Hz, 2H), 5.74 (bs, 1H), 3.46 (q, *J* = 6.5 Hz, 2H), 2.93 – 2.84 (m, 2H), 1.92 (s, 3H).

**<sup>13</sup>C NMR** (101 MHz, CDCl<sub>3</sub>) δ 170.39, 161.81 (dd, *J* = 246.7, 8.7 Hz), 128.31 (t, *J* = 10.3 Hz), 114.76 (t, *J* = 20.3 Hz), 111.99 – 110.74 (m), 39.12, 23.27, 22.93 – 22.40 (m).

**HRMS** (ESI) calculated 200.0881 [M+H]<sup>+</sup>; found 200.0881.

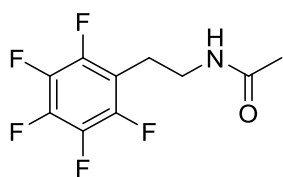

**17j** *N*-(2-(perfluorophenyl)ethyl)acetamide

Synthesised according to General Procedure 2a. Isolated as a yellow solid (26 mg, 51% yield).

**<sup>1</sup>H NMR** (400 MHz, CDCl<sub>3</sub>) δ 5.60 (bs, 1H), 3.49 (q, *J* = 6.5 Hz, 2H), 2.93 (tt, *J* = 6.6, 1.7 Hz, 2H), 1.95 (s, 3H).

**<sup>13</sup>C NMR** (101 MHz, CDCl<sub>3</sub>) δ 170.5, 147.0 – 146.3 (m), 144.4 – 143.9 (m), 141.6 – 141.1 (m), 139.1 – 138.5 (m), 136.5 – 136.0 (m), 112.3 (td, *J* = 18.8, 3.9 Hz), 38.7, 23.3, 23.0.

**HRMS** (ESI) Calculated 254.0599 [M+H]<sup>+</sup>; 254.0600.

**mp** 88 – 91 °C (CHCl<sub>3</sub>).



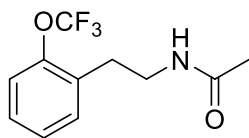

**17k** *N*-(2-(trifluoromethoxy)phenethyl)acetamide

Synthesised according to General Procedure 2a. Isolated as a yellow solid (30 mg, 61% yield)

**<sup>1</sup>H NMR** (400 MHz, Acetone-*d*<sub>6</sub>) δ 7.43 – 7.28 (m, 4H), 3.45 – 3.37 (m, 2H), 2.87 (dd, *J* = 8.0, 6.7 Hz, 2H), 1.84 (s, 3H).

**<sup>13</sup>C NMR** (101 MHz, Acetone-*d*<sub>6</sub>) δ 169.9, 148.4 (d, *J* = 1.6 Hz), 133.1, 132.3, 128.9, 128.1, 121.7 – 121.0 (m), 121.5 (q, *J* = 256.5 Hz), 39.9, 30.5, 22.8.

**HRMS** (ESI) calculated 248.0893 [M+H]<sup>+</sup>; found 248.0896.

**mp** 88 – 91 °C (CHCl<sub>3</sub>).

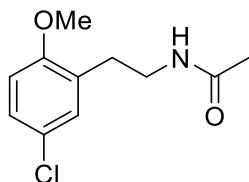

**17l** *N*-(5-chloro-2-methoxyphenethyl)acetamide

Synthesised according to general procedure 2a. Isolated as a yellow solid (35 mg, 77% yield).

**<sup>1</sup>H NMR** (400 MHz, CDCl<sub>3</sub>) δ 7.15 (dd, *J* = 8.7, 2.7 Hz, 1H), 7.08 (d, *J* = 2.7 Hz, 1H), 6.76 (d, *J* = 8.8 Hz, 1H), 5.75 (bs, 1H), 3.80 (s, 3H), 3.48 – 3.39 (m, 2H), 2.77 (t, *J* = 6.8 Hz, 2H), 1.92 (s, 3H).

**<sup>13</sup>C NMR** (101 MHz, CDCl<sub>3</sub>) δ 170.3, 156.2, 130.4, 129.3, 127.5, 125.4, 111.6, 55.7, 39.6, 30.17, 23.4.

**HRMS** (ESI) calculated 250.0605 [M+Na]<sup>+</sup>; found 250.0602.

**mp** 90 – 93 °C (CHCl<sub>3</sub>).

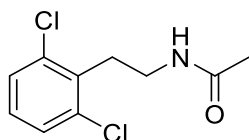

**17m** *N*-(2,6-dichlorophenethyl)acetamide

Synthesised according to general procedure 2a. Isolated as a light yellow solid (40 mg, 87% yield).

**<sup>1</sup>H NMR** (400 MHz, CDCl<sub>3</sub>) δ 7.29 (d, *J* = 8.1 Hz, 2H), 7.10 (dd, *J* = 8.5, 7.6 Hz, 1H), 5.70 (bs, 1H), 3.53 (q, *J* = 6.6 Hz, 2H), 3.17 (t, *J* = 6.9 Hz, 2H), 1.93 (s, 3H).

**<sup>13</sup>C NMR** (101 MHz, CDCl<sub>3</sub>) δ 170.4, 135.9, 135.1, 128.5, 38.2, 31.1, 23.4.

**HRMS** (ESI) Calculated 232.0920 [M+H]<sup>+</sup>; found 232.0289.

**mp** 109 – 111°C (CHCl<sub>3</sub>).

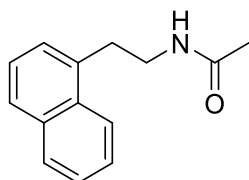

**17n** *N*-(2-(naphthalen-1-yl)ethyl)acetamide

Synthesised according to General Procedure 2a. Isolated as a yellow solid in (23 mg, 54% yield).

**<sup>1</sup>H NMR** (400 MHz, CDCl<sub>3</sub>) δ 8.12 – 8.05 (m, 1H), 7.85 (dd, *J* = 7.7, 1.7 Hz, 1H), 7.74 (d, *J* = 8.2 Hz, 1H), 7.56 – 7.44 (m, 2H), 7.39 (dd, *J* = 8.2, 7.0 Hz, 1H), 7.31 (dd, *J* = 7.0, 1.3 Hz, 1H), 6.48 (bs, 1H), 3.63 (dd, *J* = 6.6, 6.6 Hz, 2H), 3.30 (t, *J* = 7.1 Hz, 2H), 1.97 (s, 3H).

**<sup>13</sup>C NMR** (101 MHz, CDCl<sub>3</sub>) δ 171.8, 134.7, 134.0, 132.0, 129.0, 127.6, 126.9, 126.3, 125.9, 125.6, 123.6, 41.0, 32.6, 22.4.

**HRMS** (ESI) Calculated 214.1226 [M+H]<sup>+</sup>; found 214.1225.

**mp** 68 – 71°C (CHCl<sub>3</sub>).

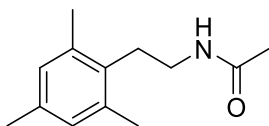

**17o** *N*-(2,4,6-trimethylphenethyl)acetamide

Synthesised according to General Procedure 2a. As a yellow solid (22 mg, 54% yield).

**<sup>1</sup>H NMR** (400 MHz, CDCl<sub>3</sub>) δ 6.85 (s, 2H), 5.66 (bs, 1H), 3.39 – 3.30 (m, 2H), 2.87 – 2.79 (m, 2H), 2.31 (s, 6H), 2.25 (s, 3H), 1.97 (s, 3H).

**<sup>13</sup>C NMR** (101 MHz, CDCl<sub>3</sub>) δ 170.2, 136.7, 135.9, 132.4, 129.2, 38.9, 29.5, 23.5, 20.9, 19.9.

**HRMS** (ESI) Calculated 228.1359 [M+Na]<sup>+</sup>; found 228.1358.

**mp** 116 – 119 °C (CHCl<sub>3</sub>).

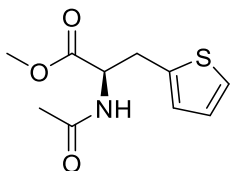

**17p** methyl (S)-2-acetamido-3-(thiophen-2-yl)propanoate

Synthesised according to General Procedure 2a. Isolated as a pale yellow solid (31 mg, 68% yield).

<sup>1</sup>H NMR (400 MHz, CDCl<sub>3</sub>) δ 7.16 (dd, *J* = 5.2, 1.2 Hz, 1H), 6.92 (dd, *J* = 5.2, 3.4 Hz, 1H), 6.76 (dd, *J* = 3.5, 1.1 Hz, 1H), 6.17 (bd, *J* = 7.6 Hz, 1H), 4.87 (dt, *J* = 7.7, 4.9 Hz, 1H), 3.75 (s, 3H), 3.37 (ddd, *J* = 4.9, 2.5, 0.8 Hz, 2H), 2.02 (s, 3H).

<sup>13</sup>C NMR (101 MHz, CDCl<sub>3</sub>) δ 171.6, 169.8, 137.3, 127.1, 126.8, 125.0, 53.1, 52.7, 32.0, 23.3.

HRMS (ESI) Calculated 250.0508 [M+Na]<sup>+</sup>; found 250.0506.

mp 108 – 110 °C (CHCl<sub>3</sub>).

Specific rotation: [α]<sub>D</sub><sup>23</sup> +66.4 (c = 0.30, CHCl<sub>3</sub>).

Chiral HPLC CHIRALPAK AD-H column, 8:92 *i*PrOH:Hexane, 1.0 mL/min, 20 °C, 233 nm, 12.294 min (*D* isomer, 0.898%) and 17.847 min (*L* isomer, 99.102%) giving 98% e.e.

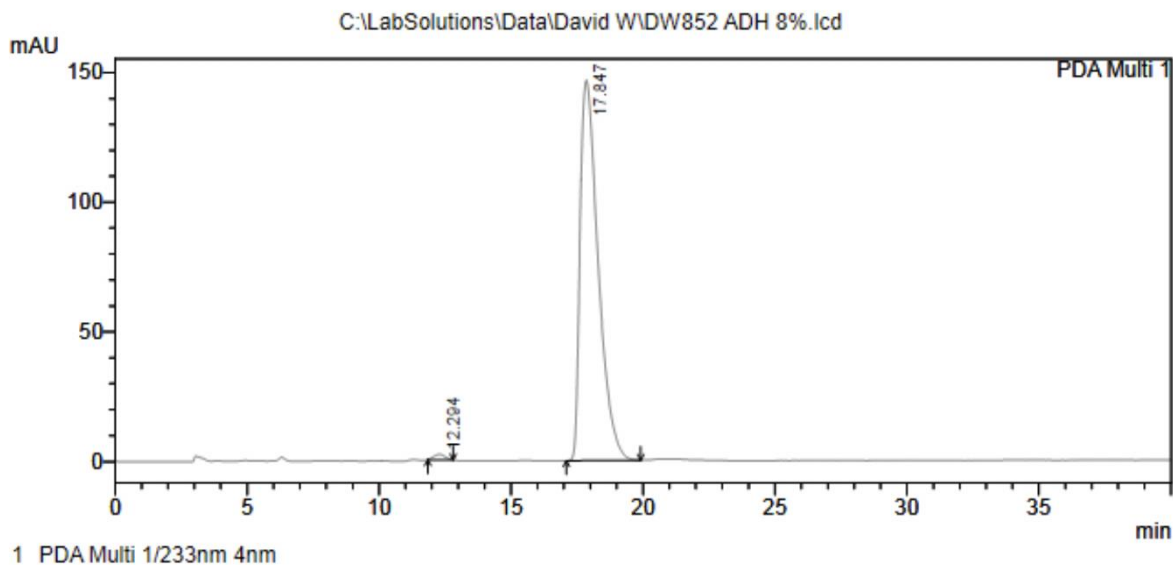

PeakTable

PDA Ch1 233nm 4nm

| Peak# | Ret. Time | Area    | Height | Area %  | Height % |
|-------|-----------|---------|--------|---------|----------|
| 1     | 12.294    | 63369   | 2082   | 0.898   | 1.399    |
| 2     | 17.847    | 6993775 | 146722 | 99.102  | 98.601   |
| Total |           | 7057144 | 148804 | 100.000 | 100.000  |

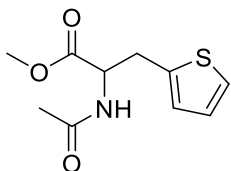

**rac-17p** methyl 2-acetamido-3-(thiophen-2-yl)propanoate

Synthesised according to general procedure 2a. Isolated as a yellow solid (31 mg, 68% yield).

<sup>1</sup>H NMR (400 MHz, CDCl<sub>3</sub>) δ 7.16 (dd, *J* = 5.1, 1.2 Hz, 1H), 6.93 (dd, *J* = 5.2, 3.4 Hz, 1H), 6.76 (dd, *J* = 3.5, 1.1 Hz, 1H), 6.15 (bd, *J* = 7.7 Hz, 1H), 4.87 (dt, *J* = 7.6, 4.9 Hz, 1H), 3.76 (s, 3H), 3.37 (ddd, *J* = 4.9, 2.3, 0.8 Hz, 2H), 2.02 (s, 3H).

<sup>13</sup>C NMR (101 MHz, CDCl<sub>3</sub>) δ 171.6, 169.8, 137.3, 127.2, 126.8, 125.0, 53.1, 52.7, 32.0, 23.3.

HRMS (ESI) Calculated 250.0508 [M+Na]<sup>+</sup>; found 250.0506.

mp 85 – 87 °C (CHCl<sub>3</sub>).

**Chiral HPLC** CHIRALPAK AD-H column, 8:92 *i*PrOH:Hexane, 1.0 mL/min, 20 °C, 235 nm, 11.938 min (*D* isomer, 50.047%) and 17.369 min (*L* isomer, 49.953%).

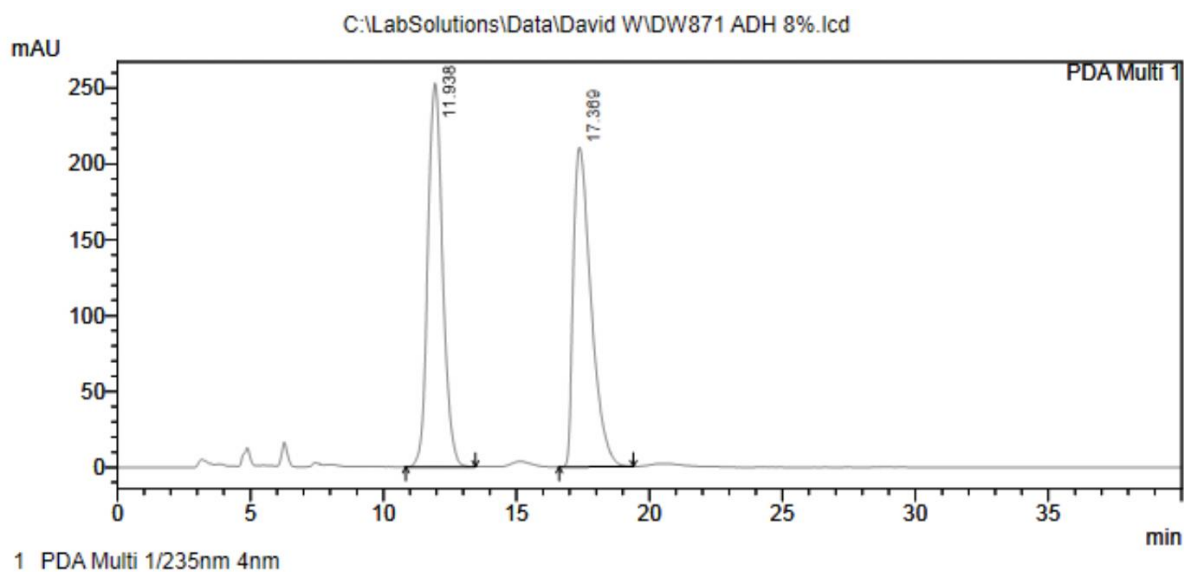

PeakTable

| Peak# | Ret. Time | Area     | Height | Area %  | Height % |
|-------|-----------|----------|--------|---------|----------|
| 1     | 11.938    | 9796625  | 252970 | 50.047  | 54.570   |
| 2     | 17.369    | 9778162  | 210597 | 49.953  | 45.430   |
| Total |           | 19574786 | 463567 | 100.000 | 100.000  |

# Spectral Data

## Oxime variant A

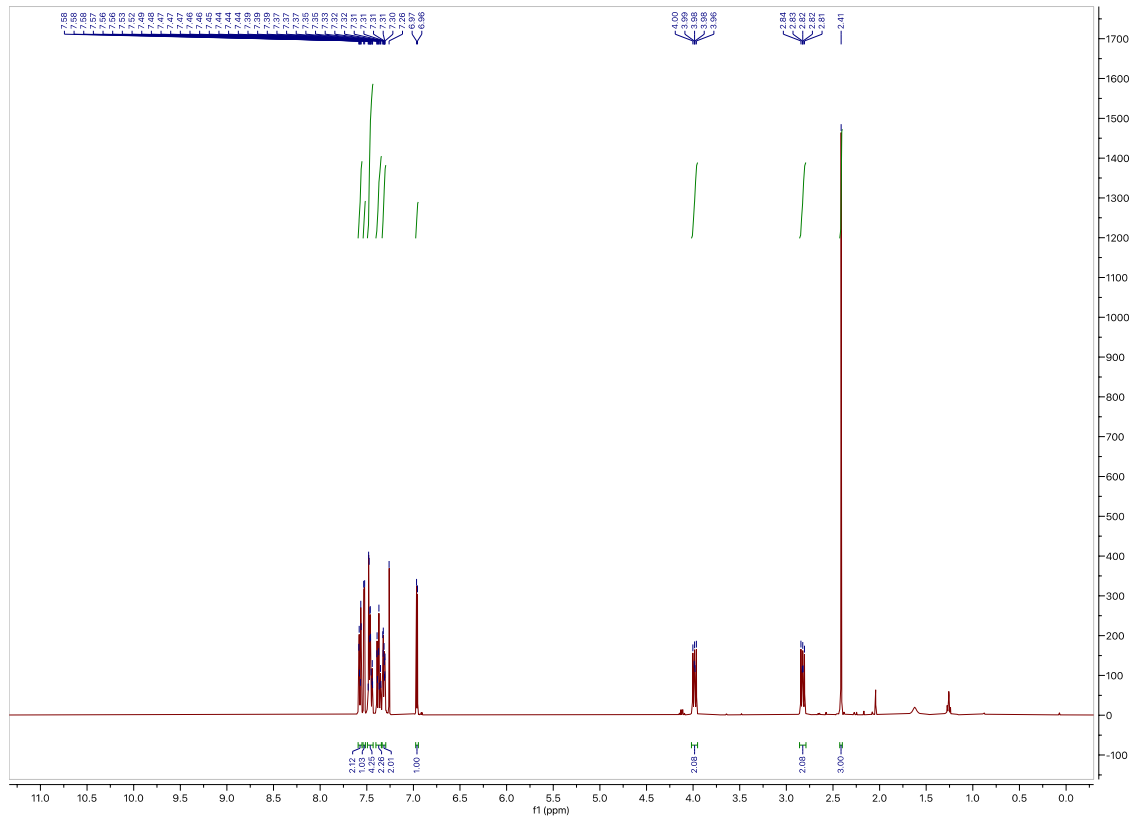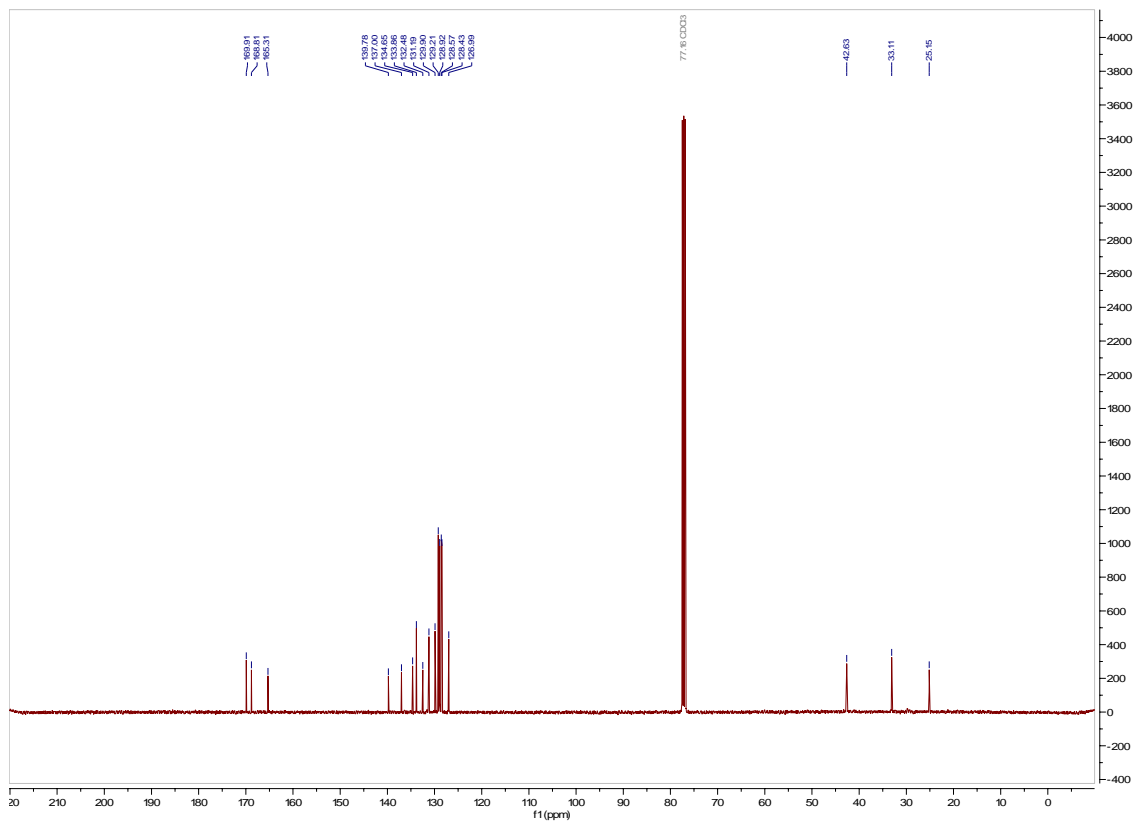

**Oxime variant B**

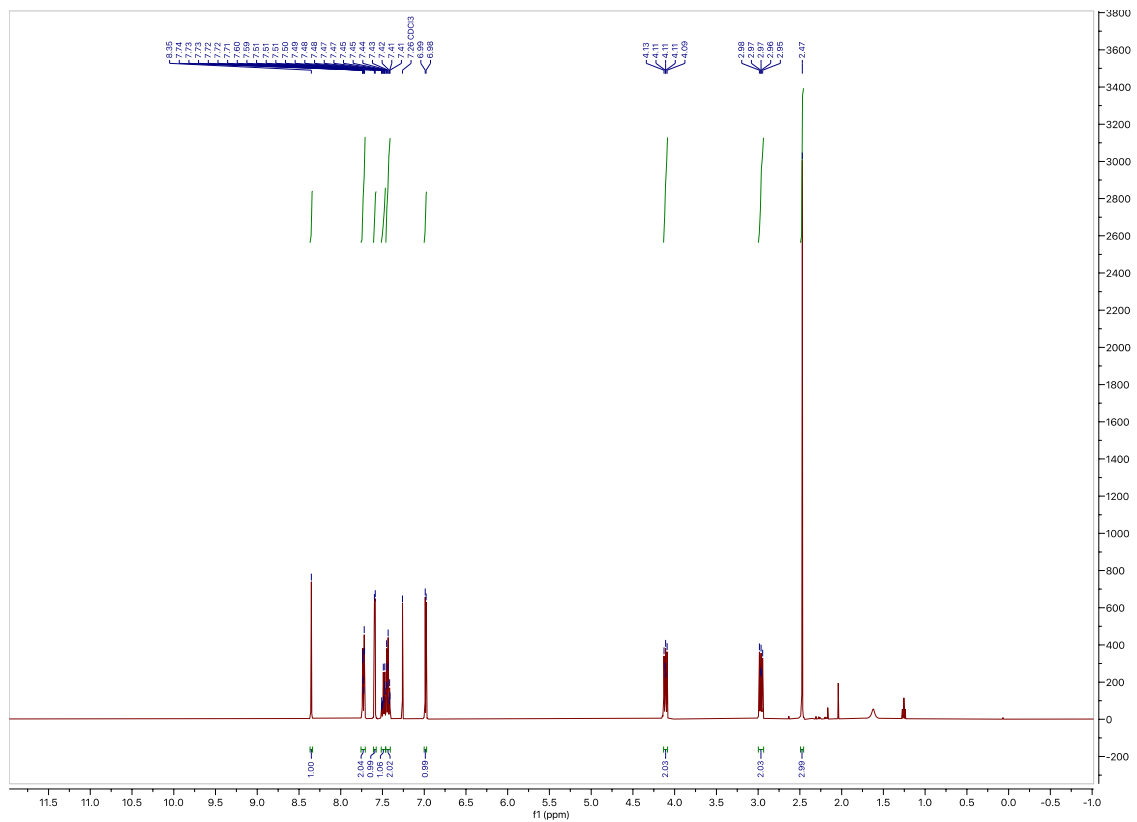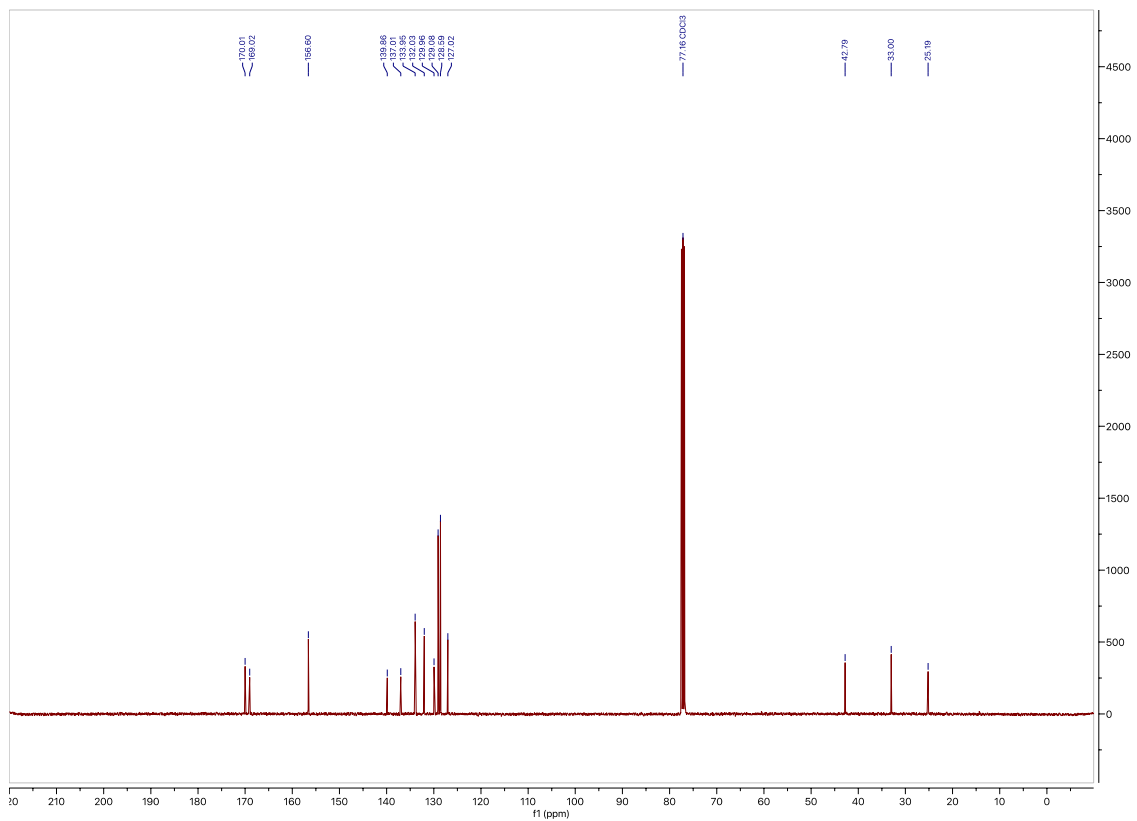

# Oxime variant C

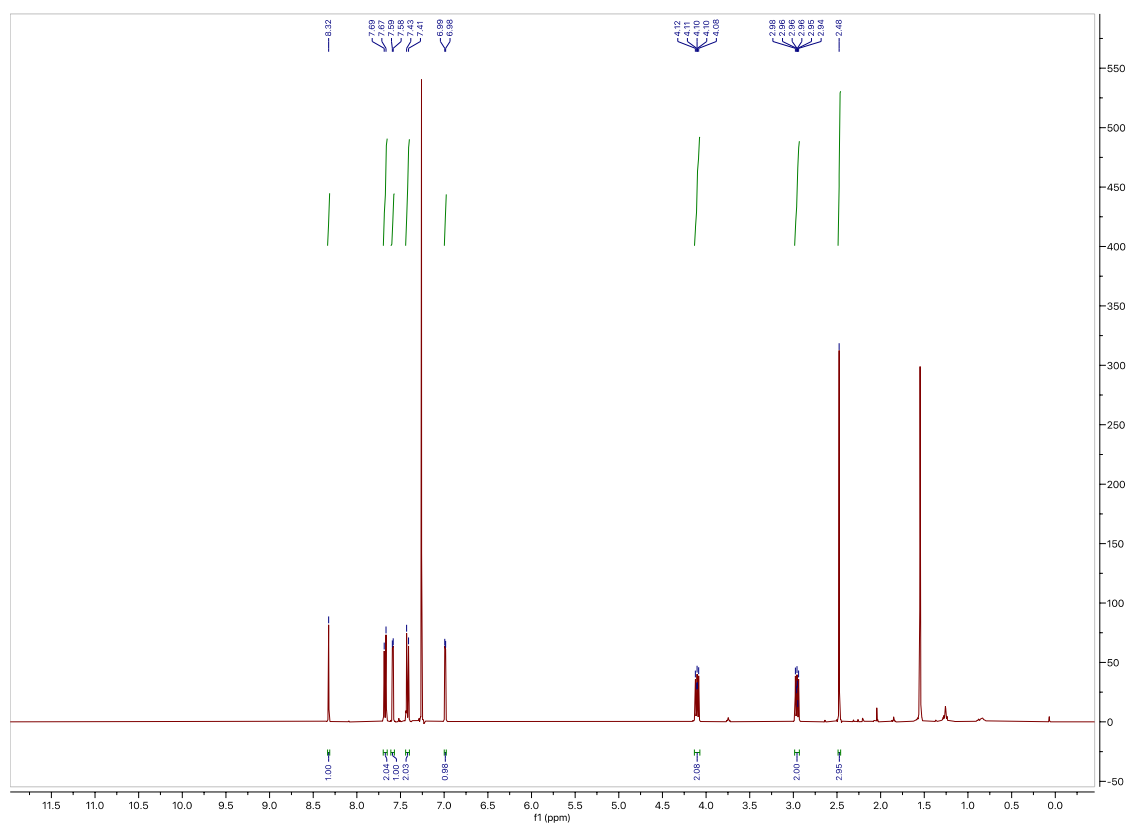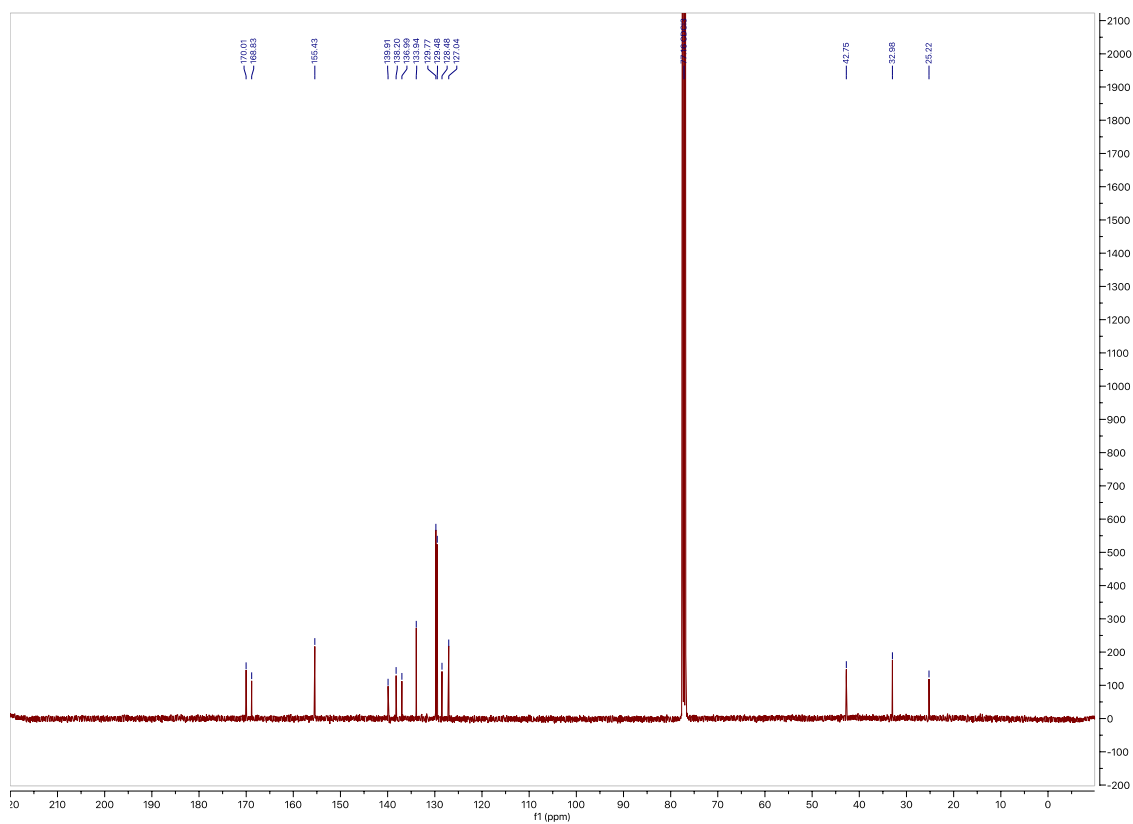



SM 16a

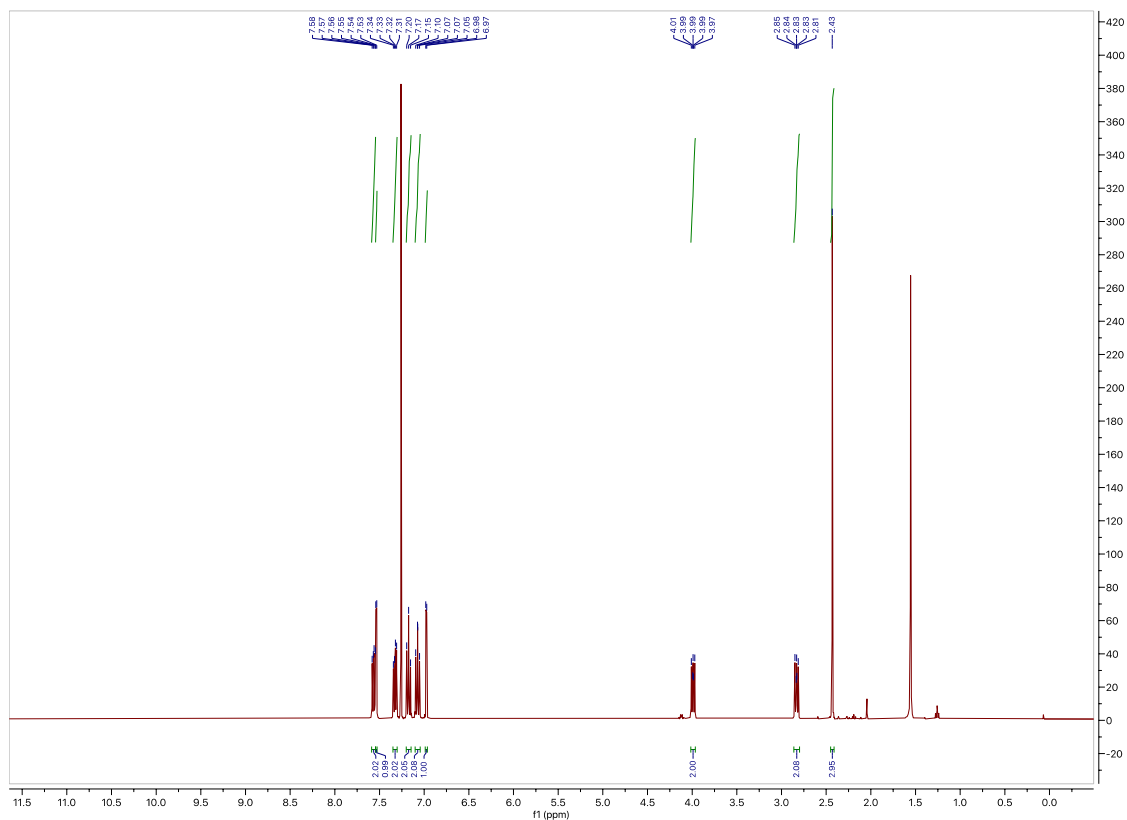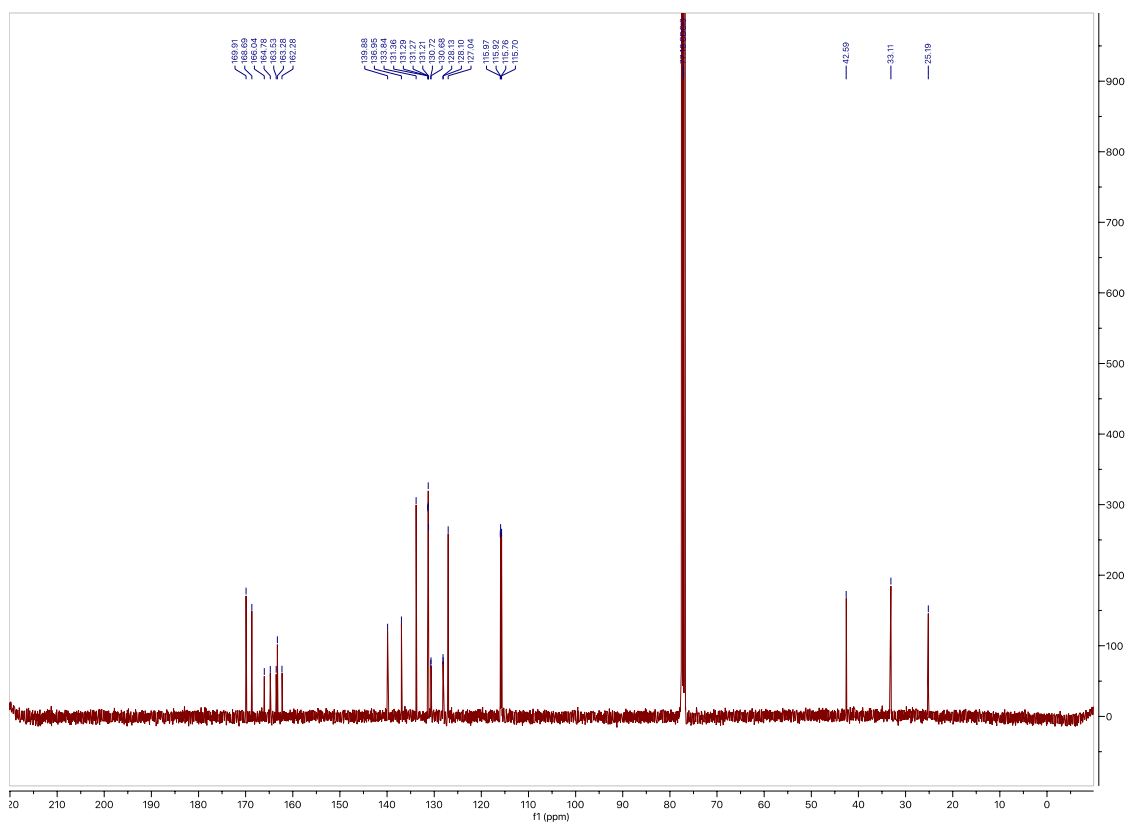

SM 16b

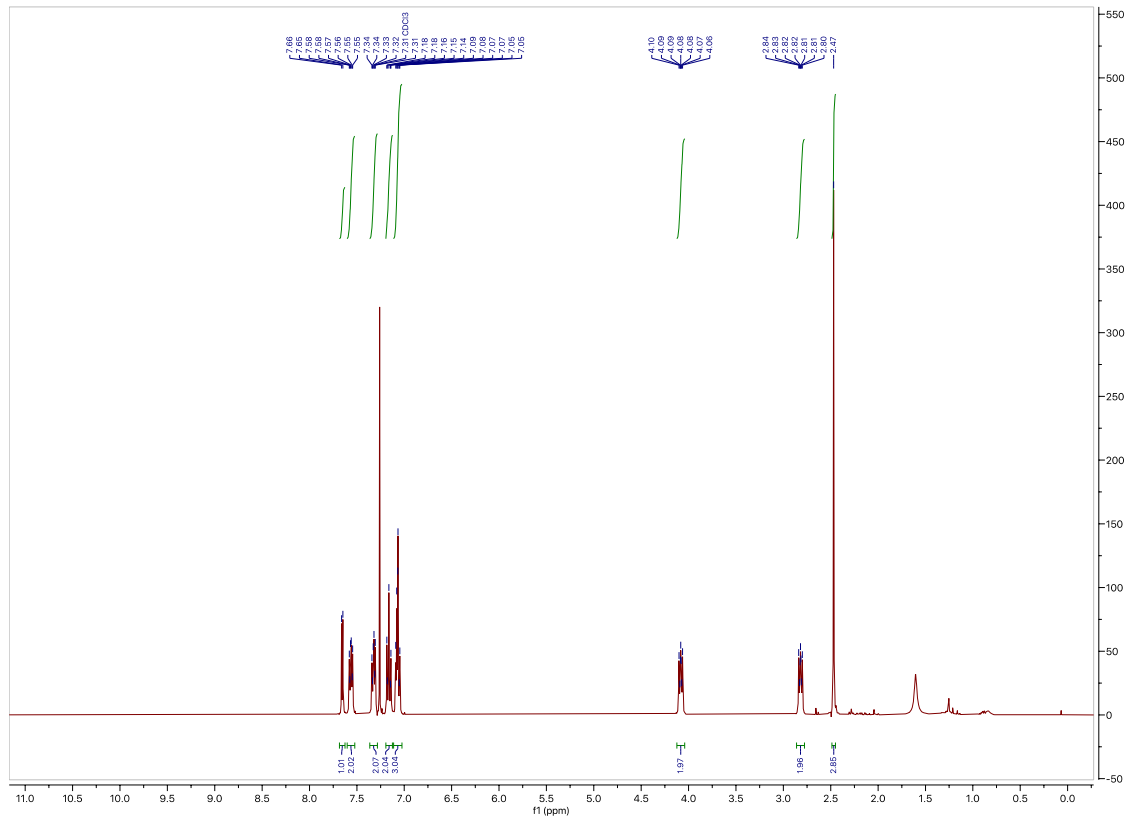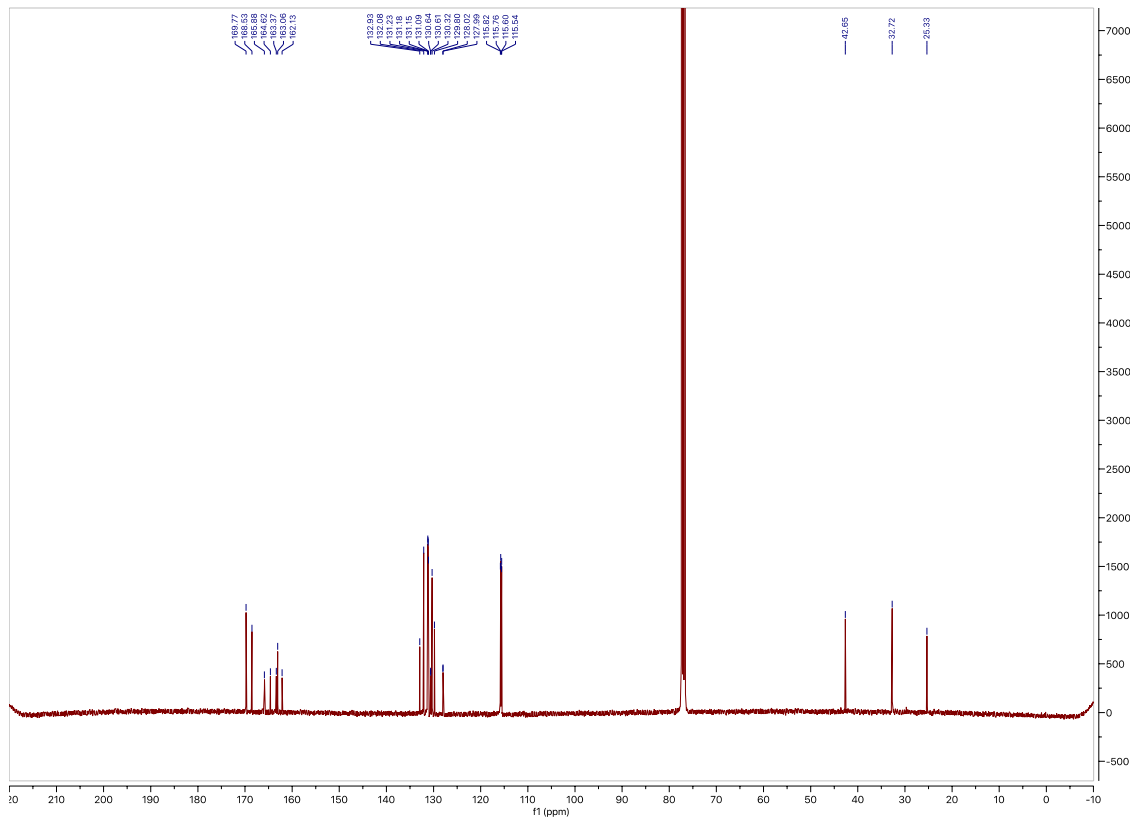

SM 16c

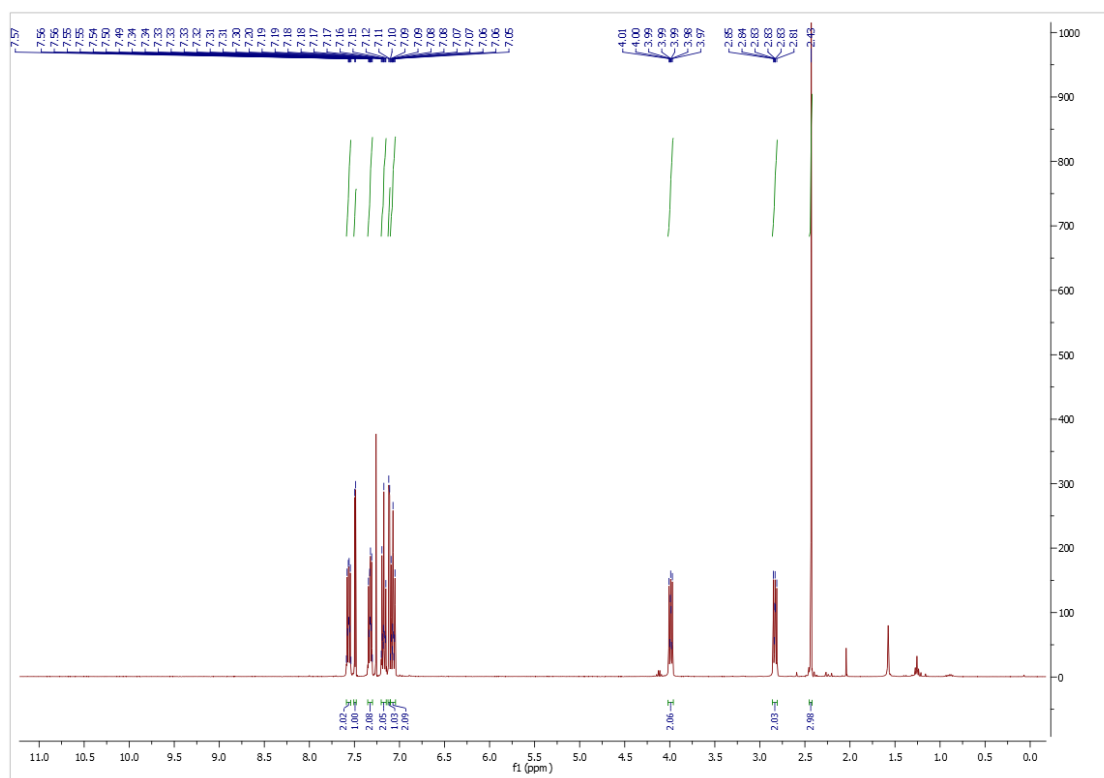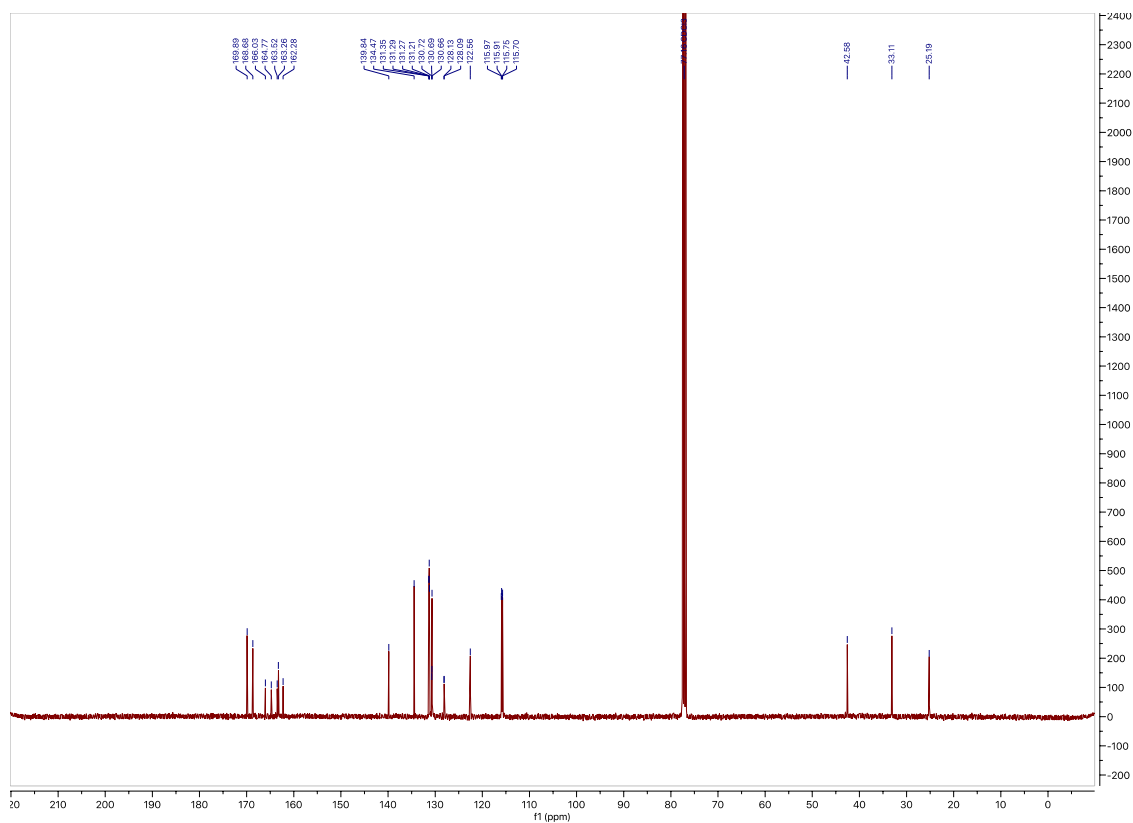

SM 16d

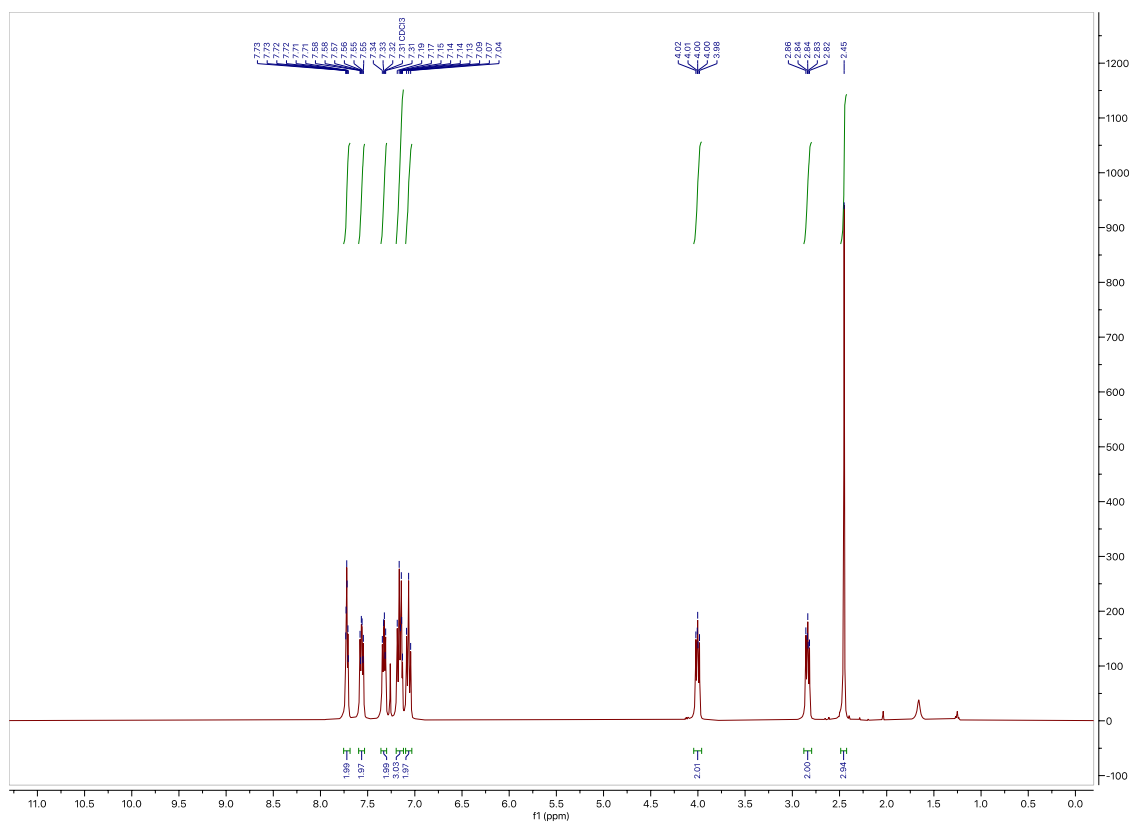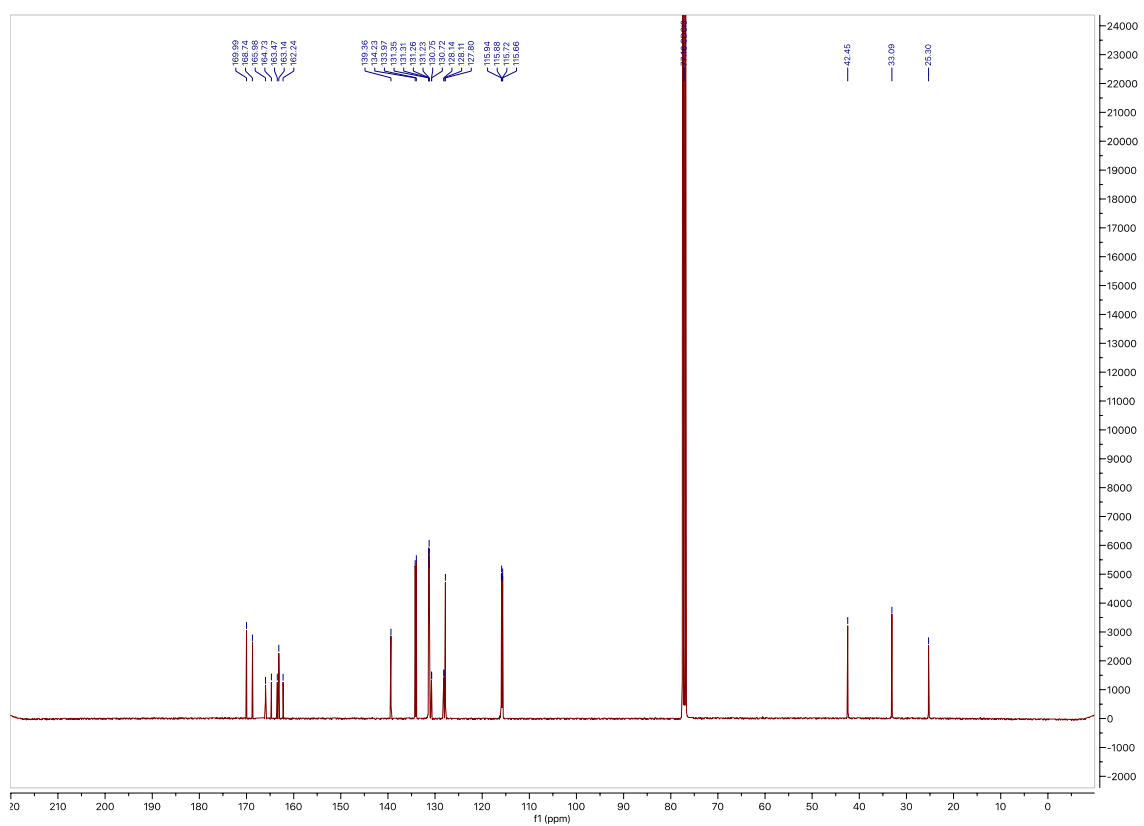

SM 16e

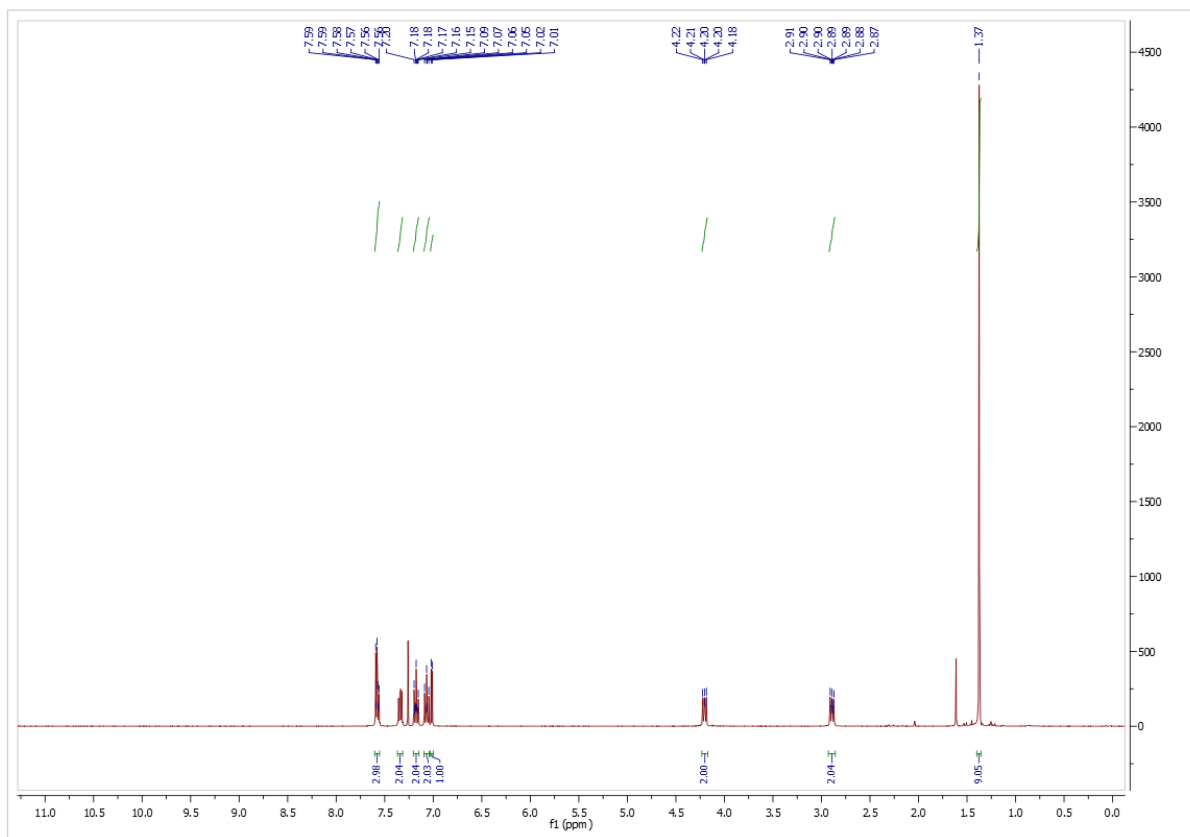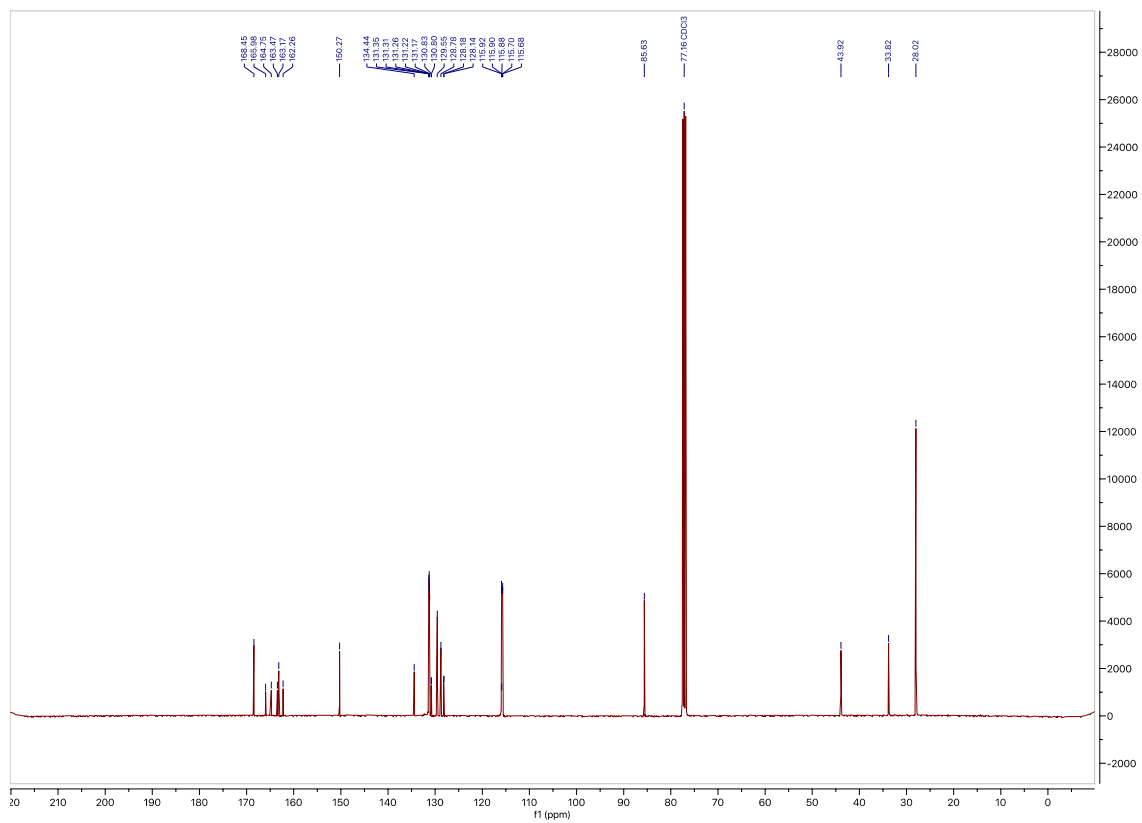

SM 16f

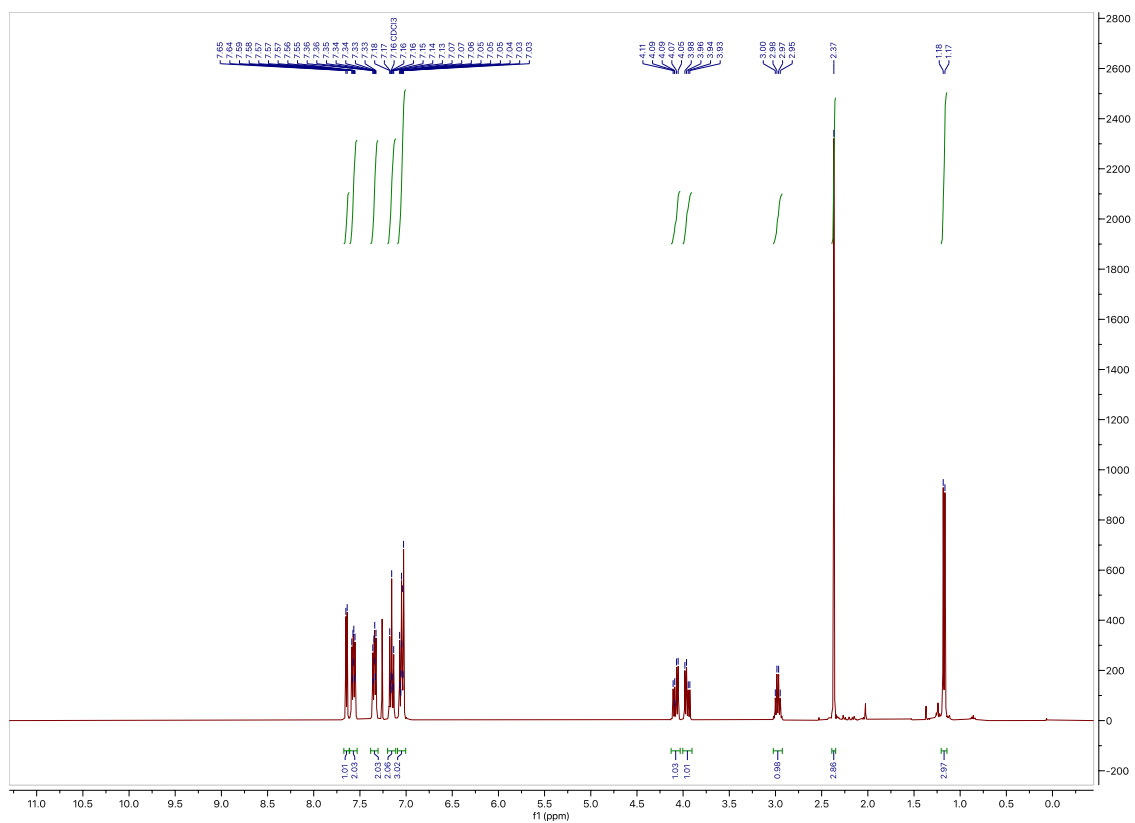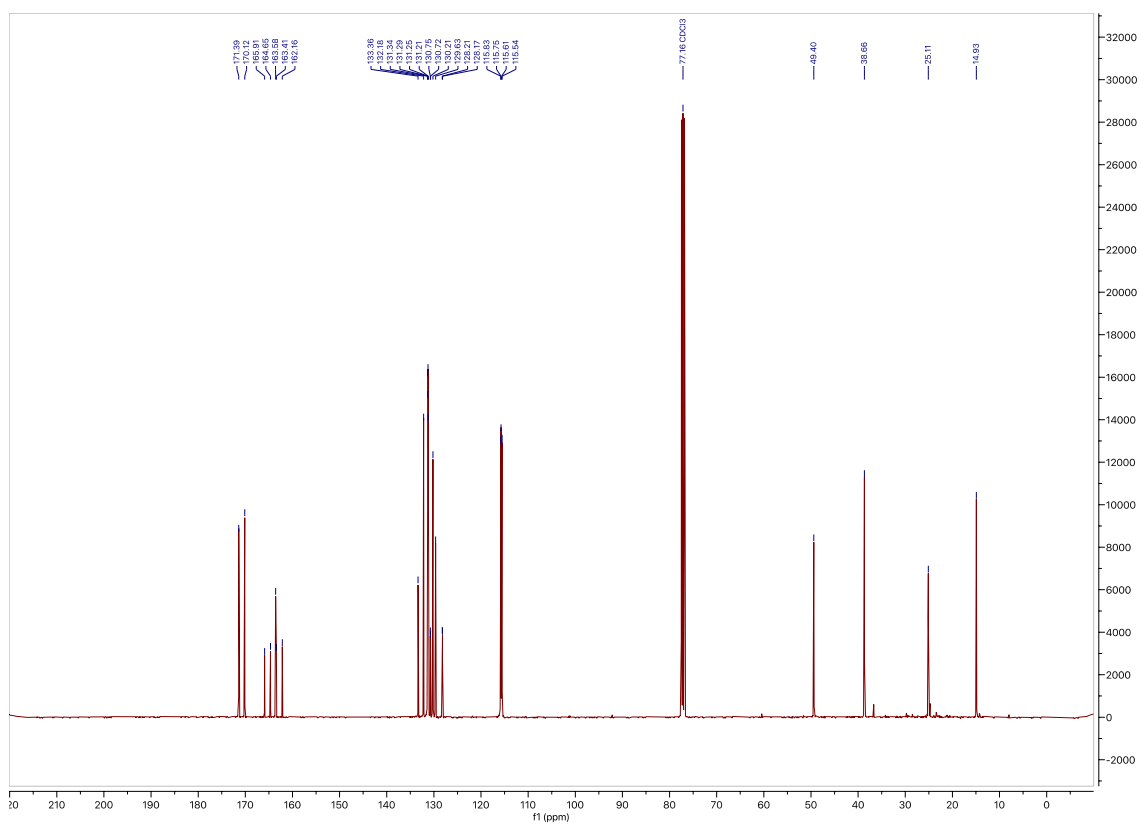

SM 16g

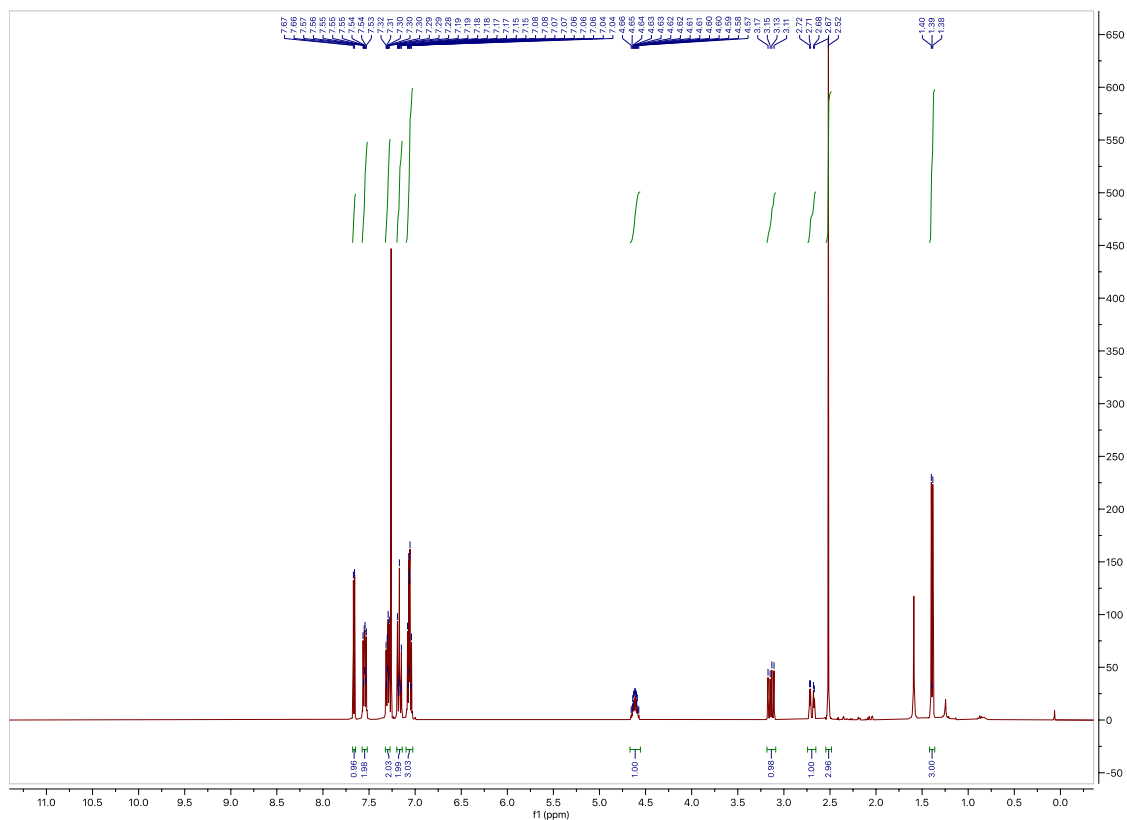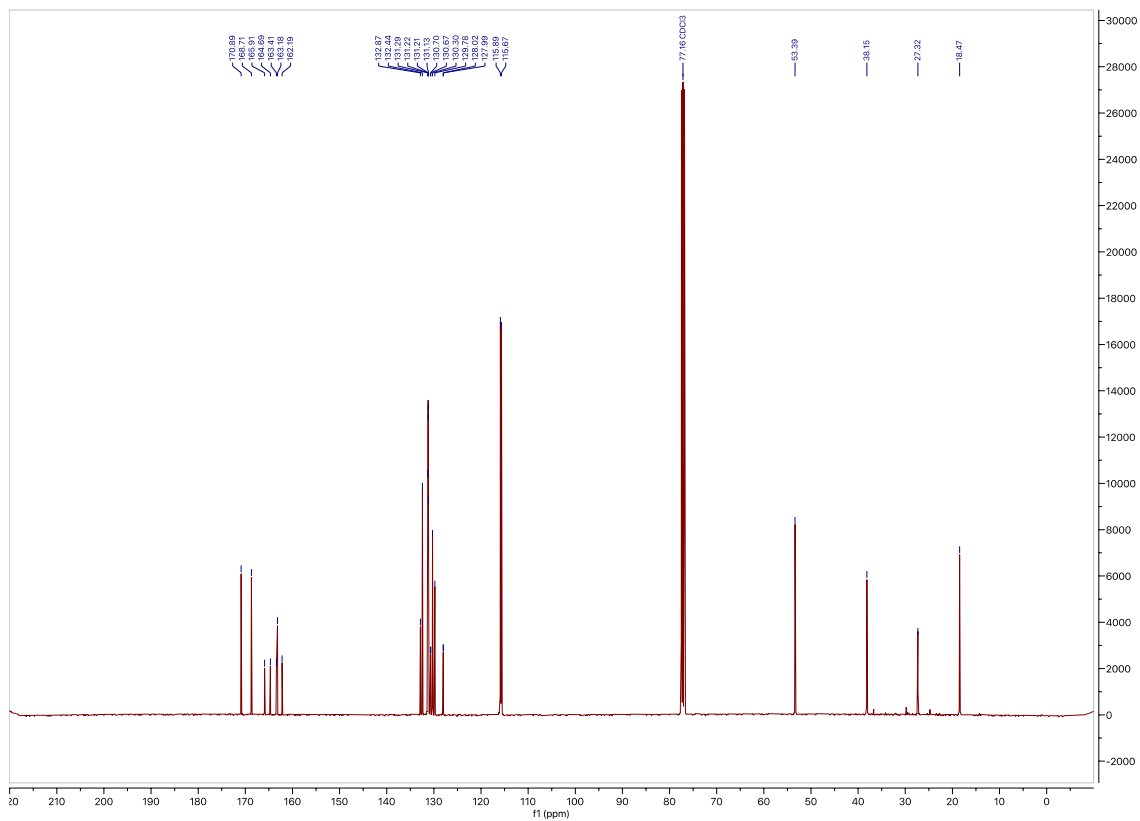

# SM S-16g

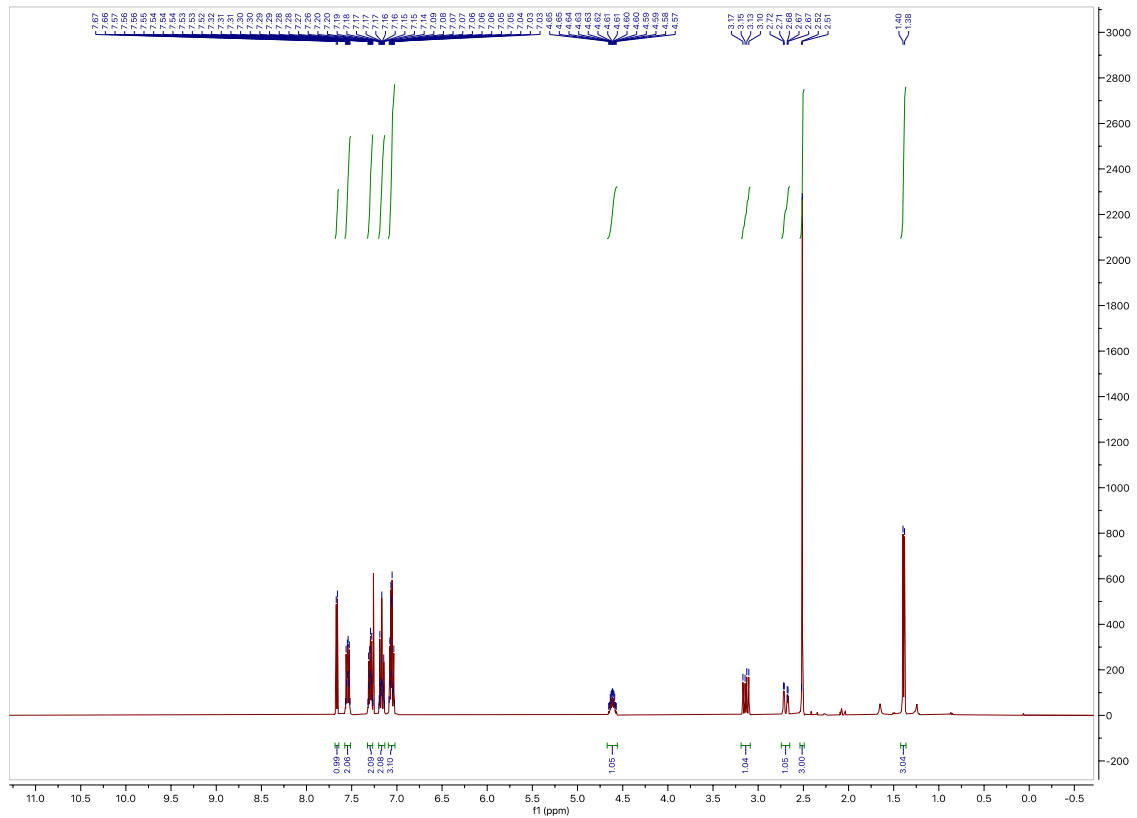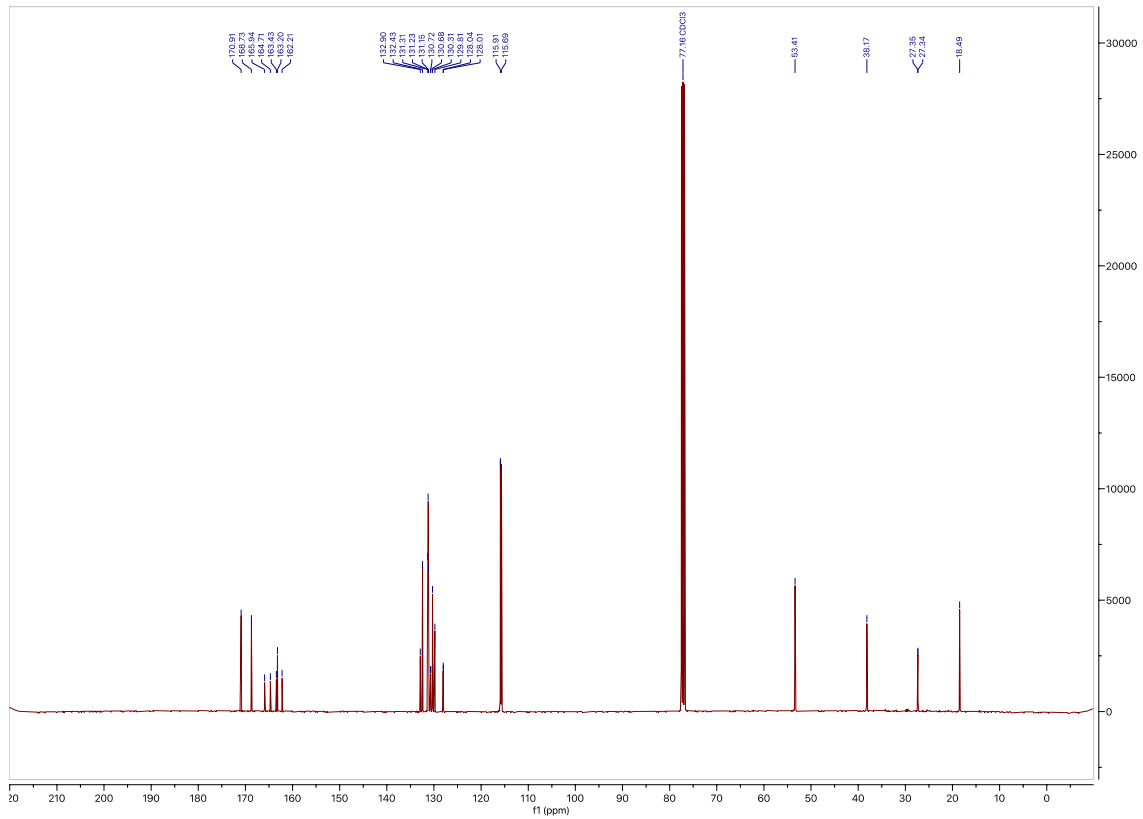



SM R-16g

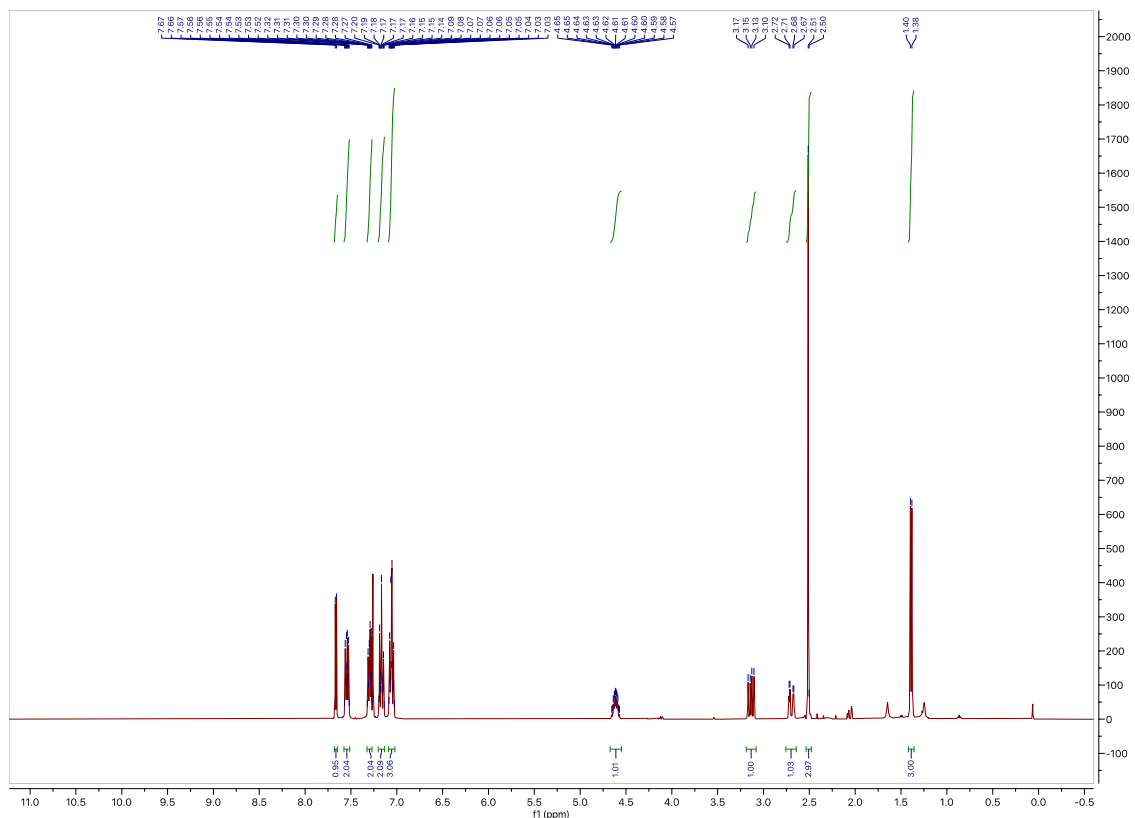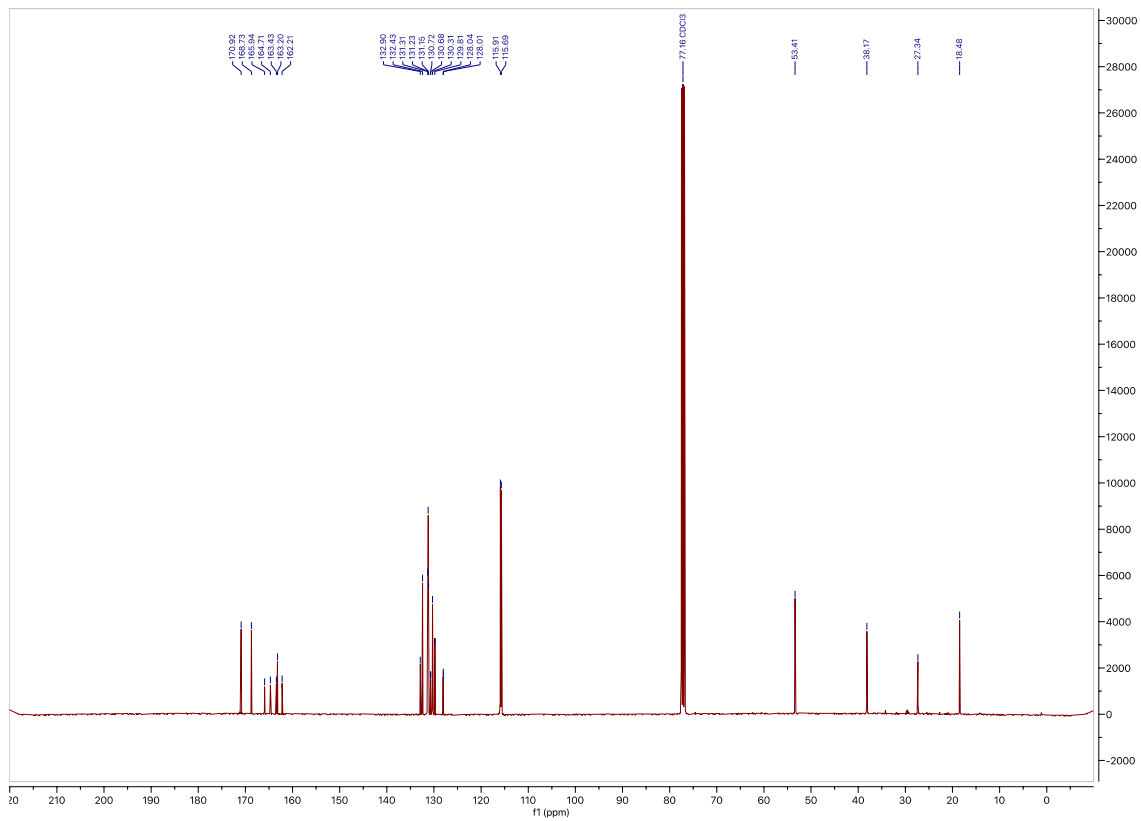

SM 16h

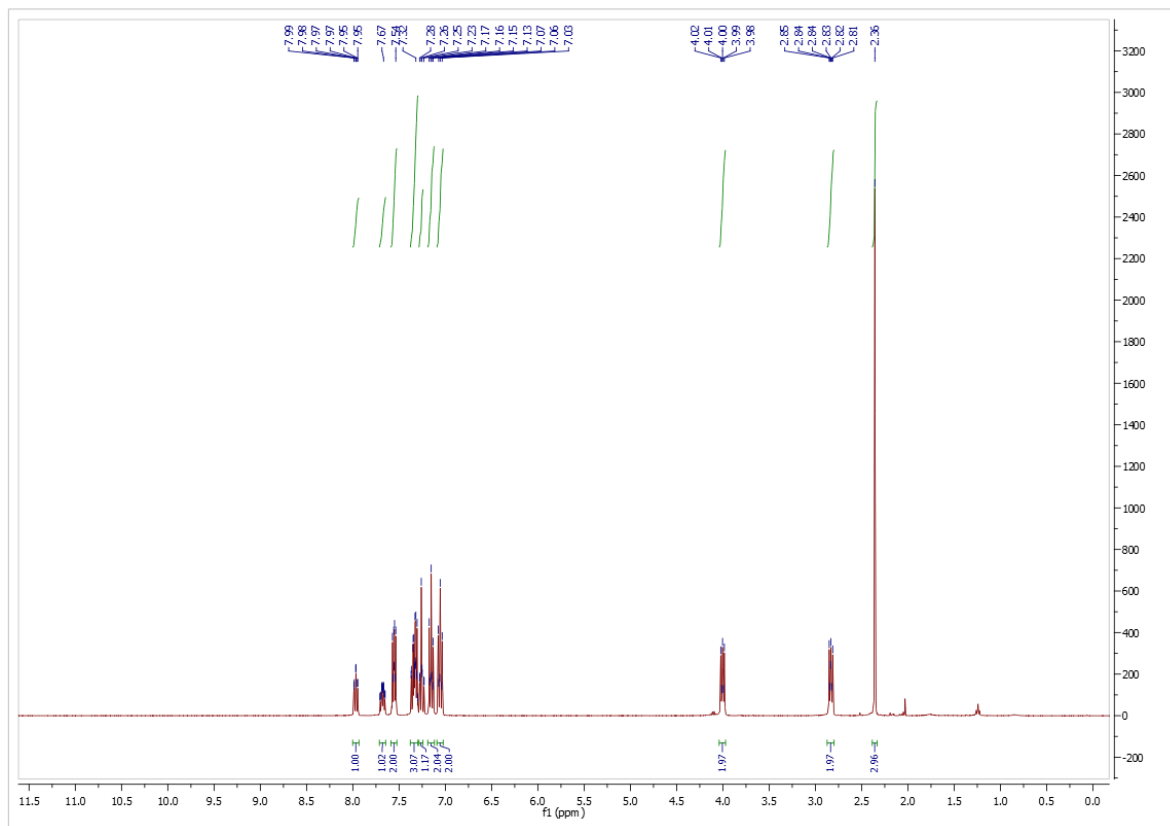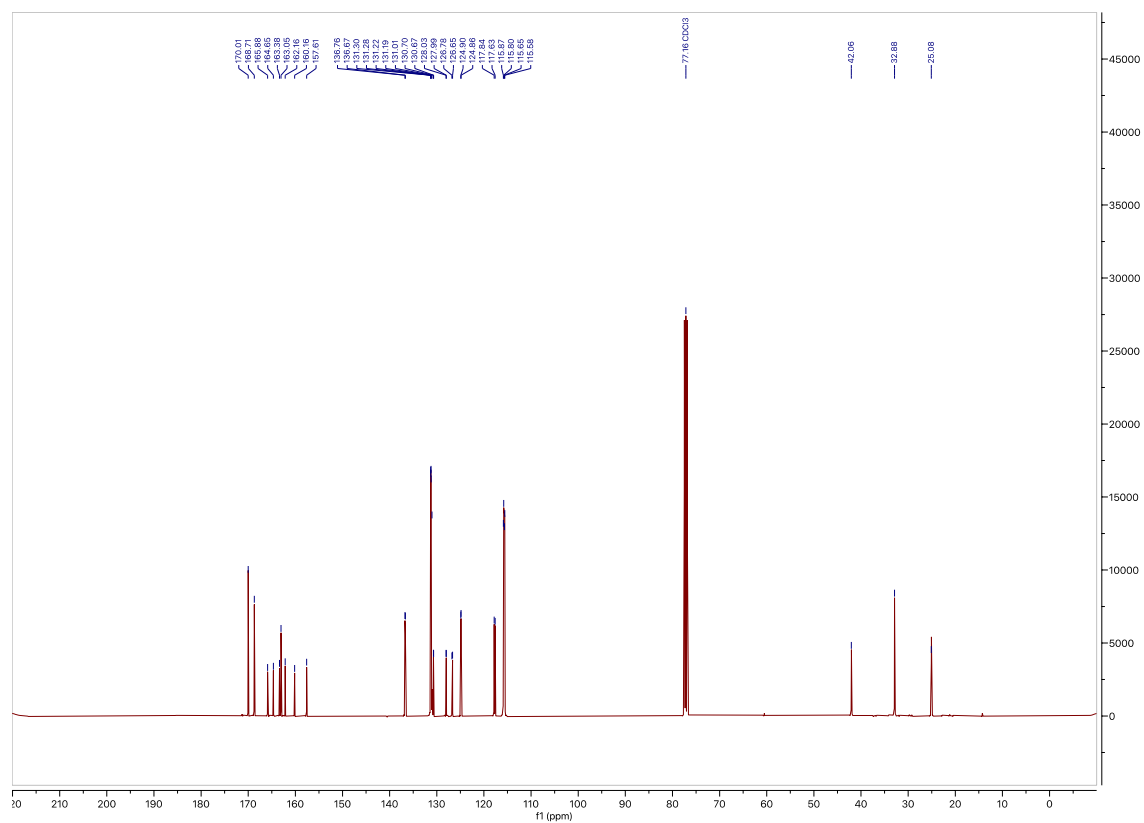

SM 16i

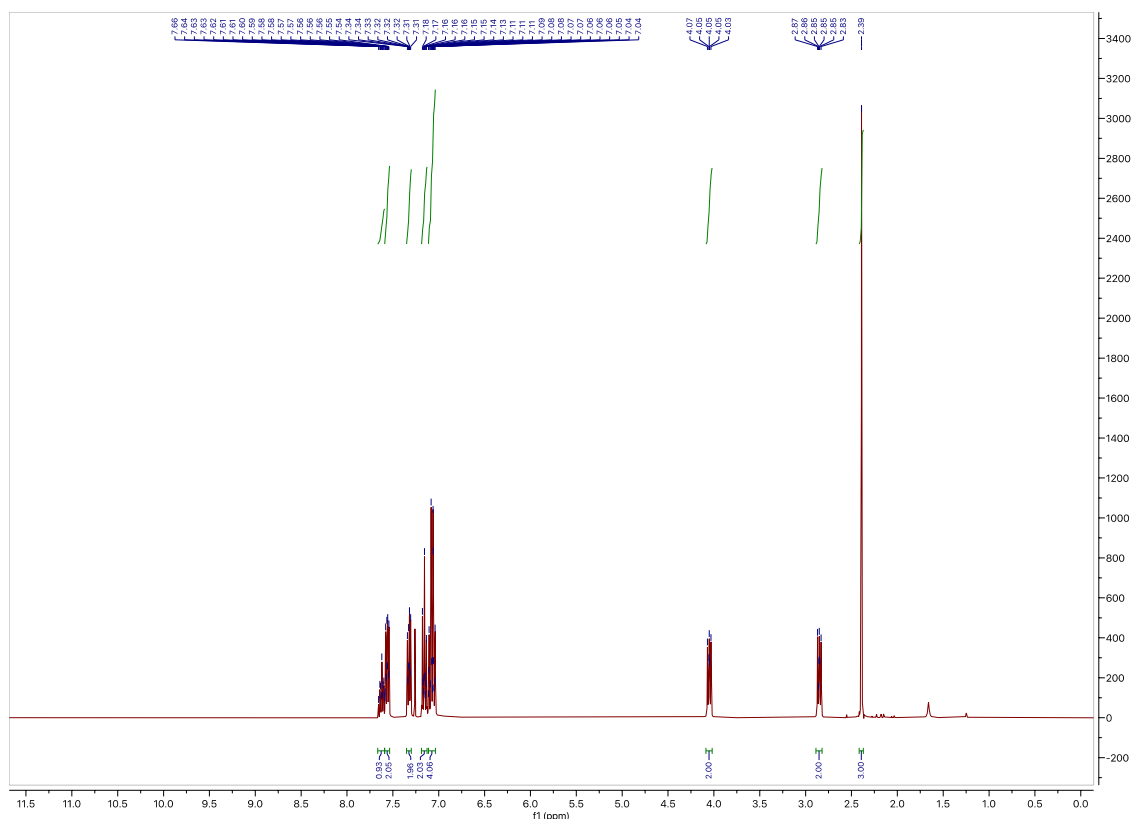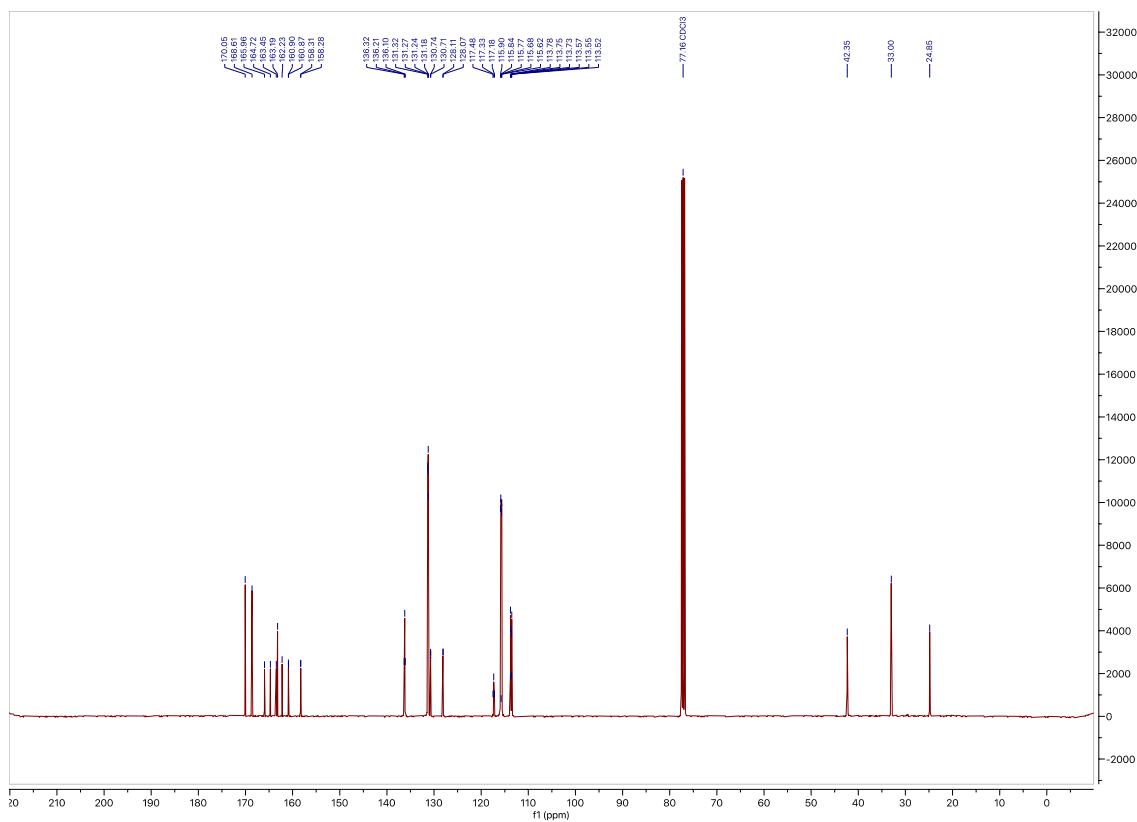

SM 16j

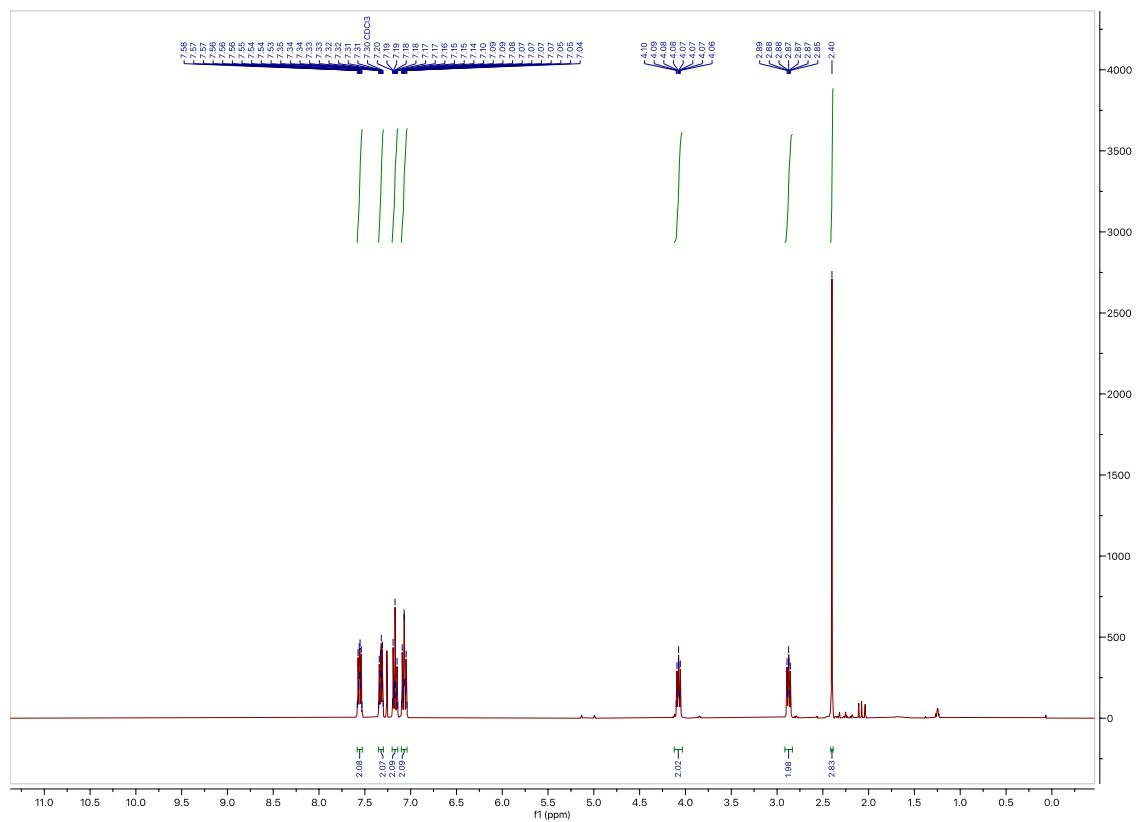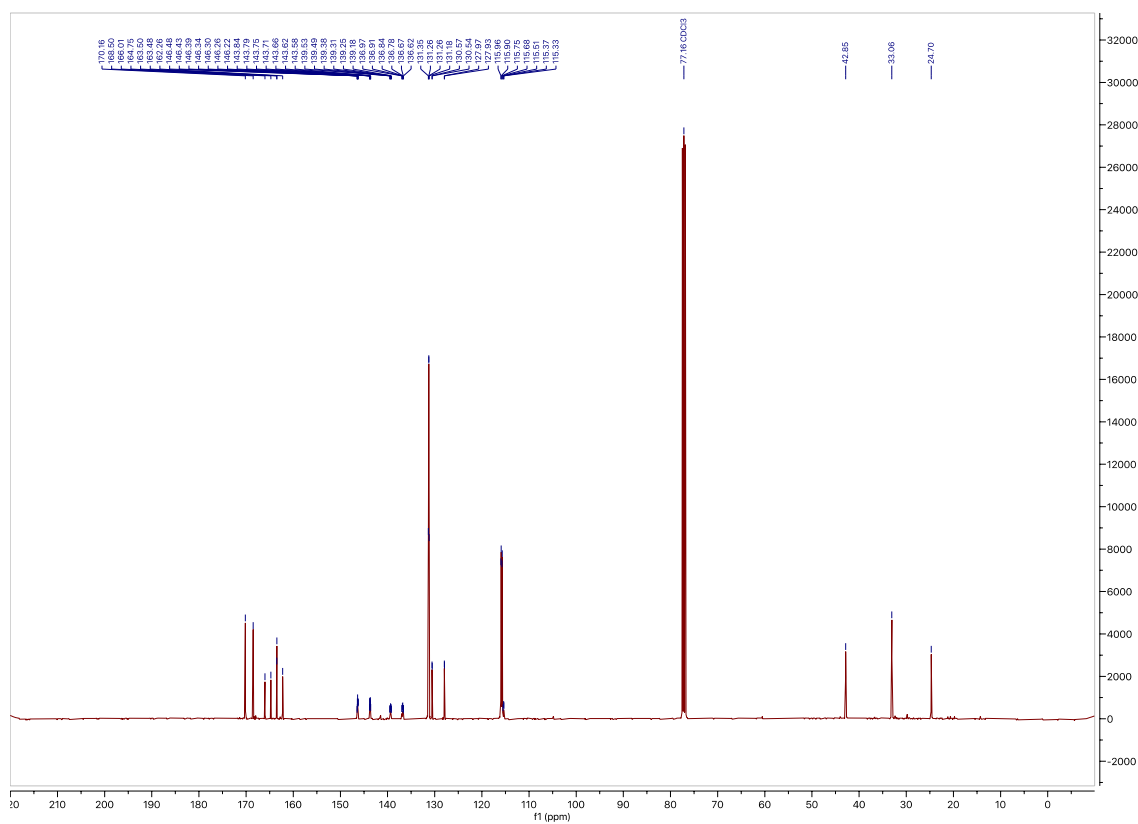

SM 16k

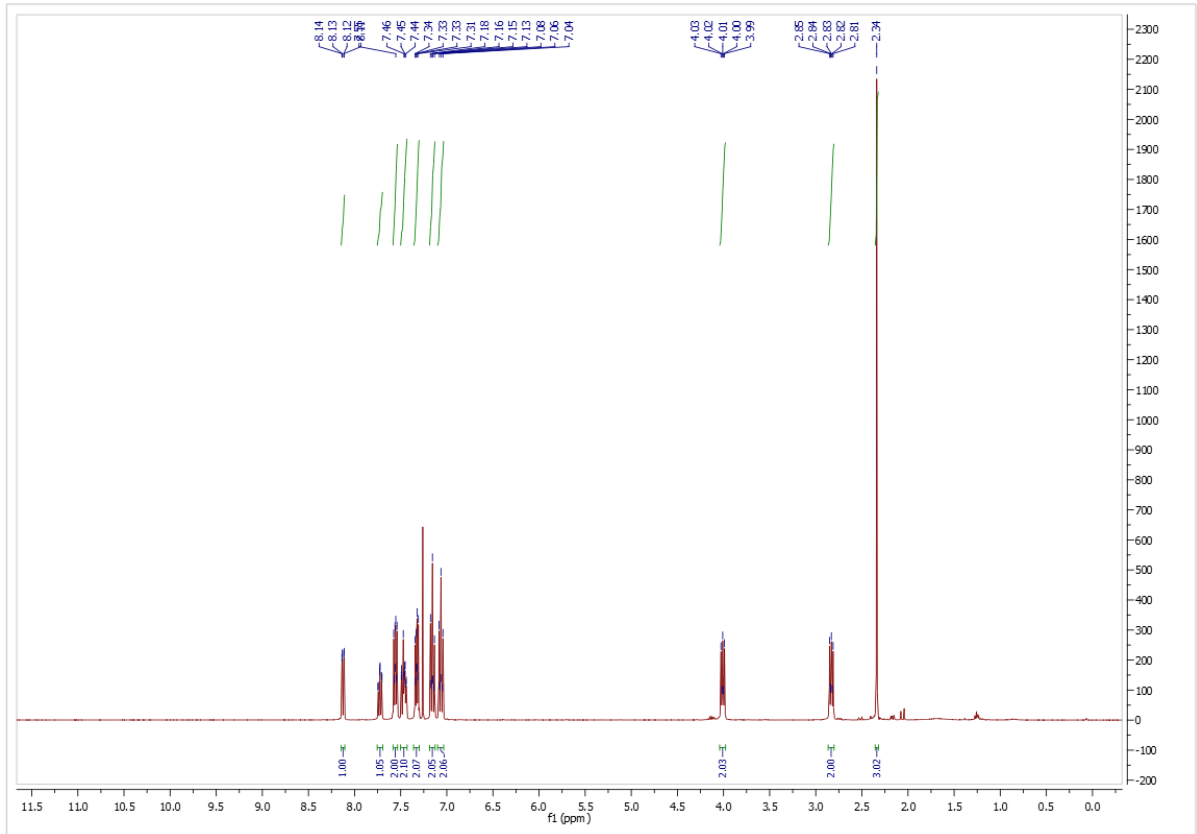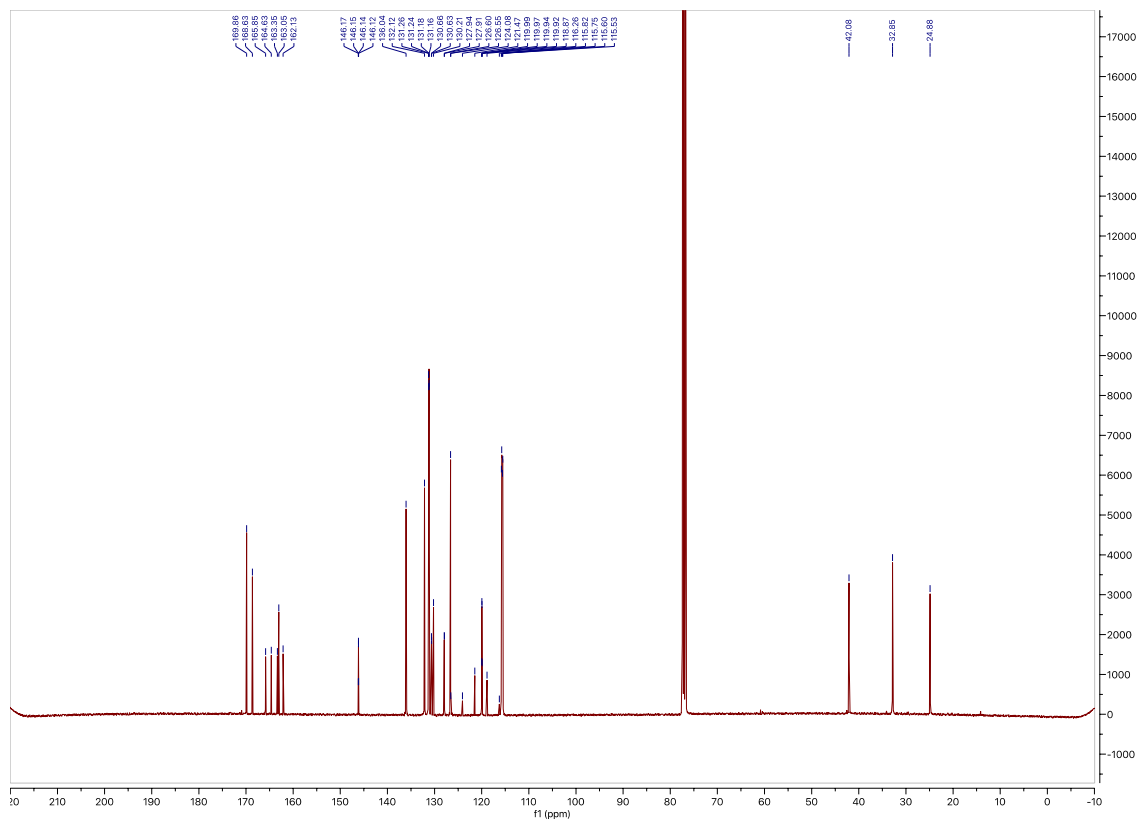

SM 16I

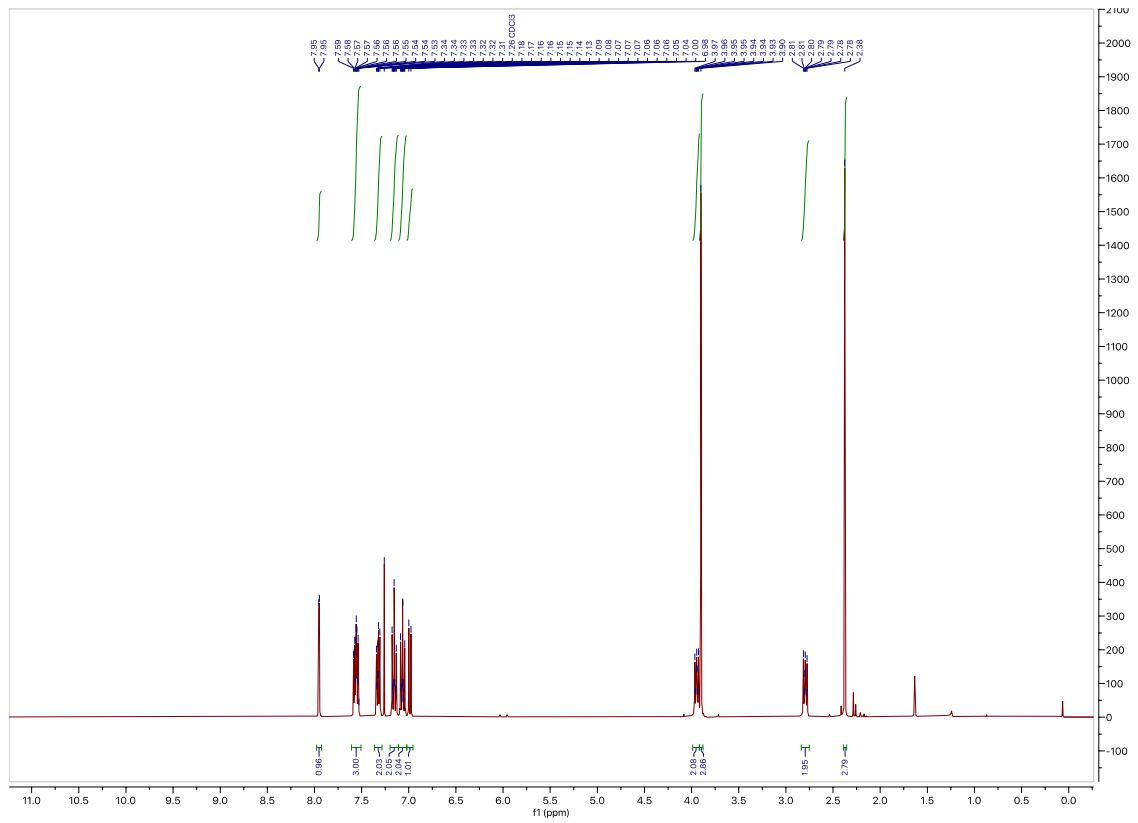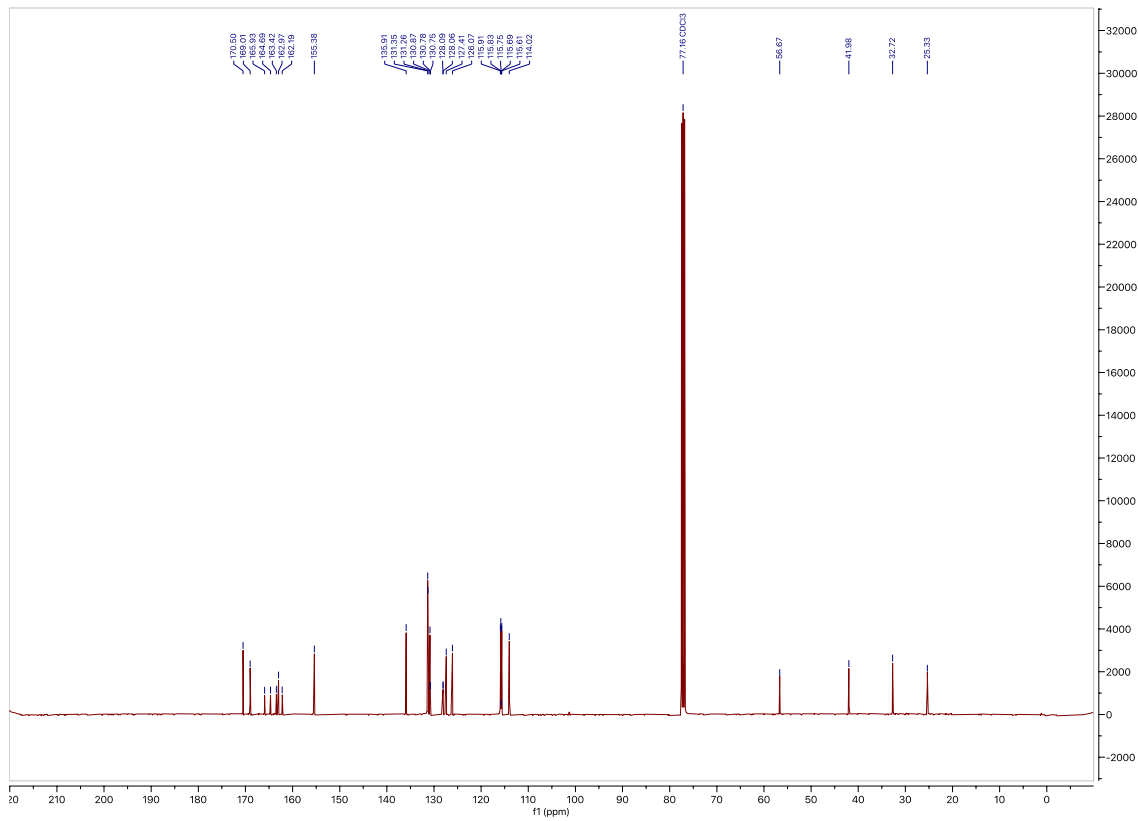

SM 16m

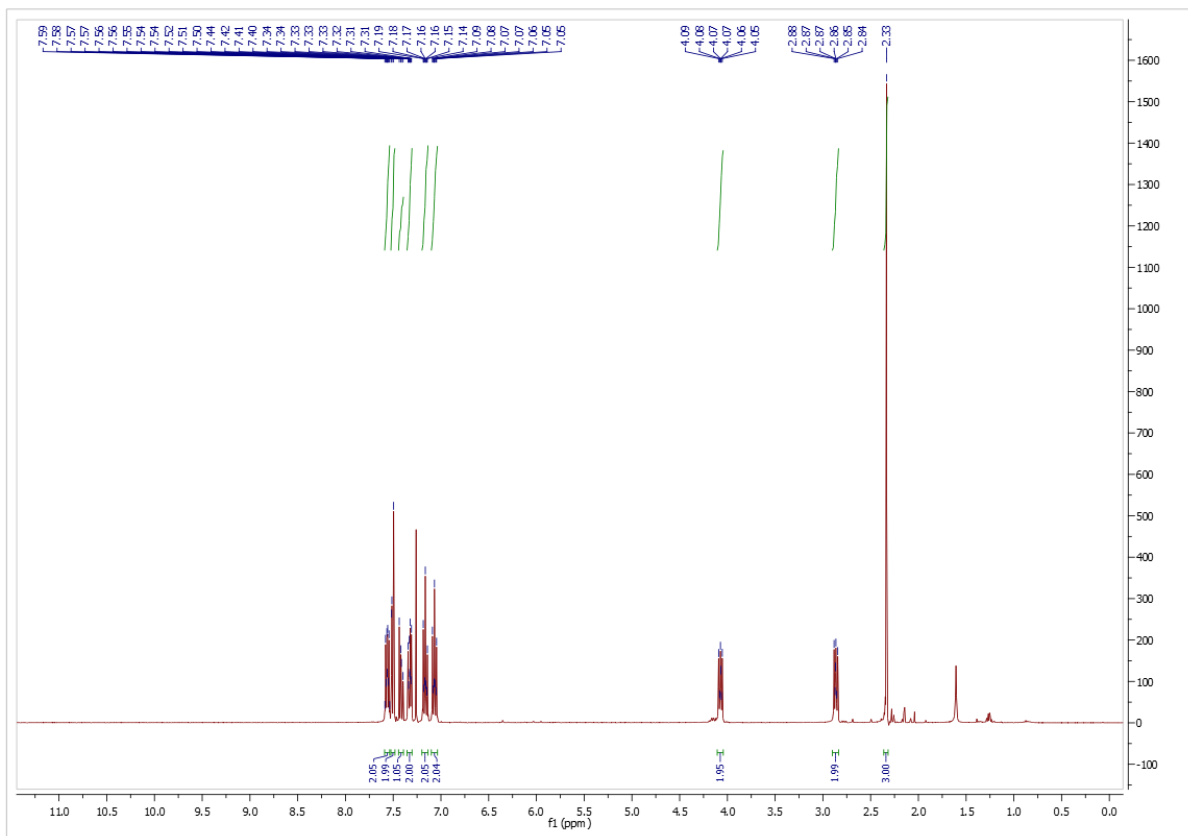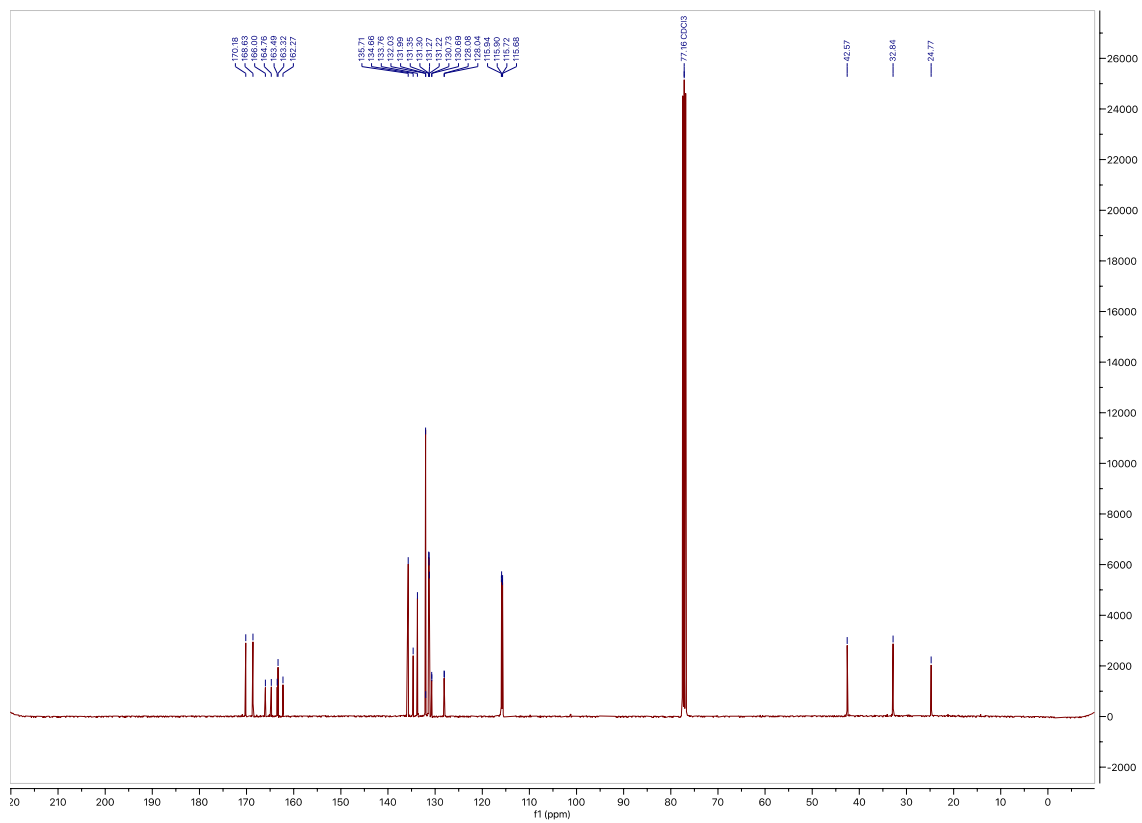

SM 16n

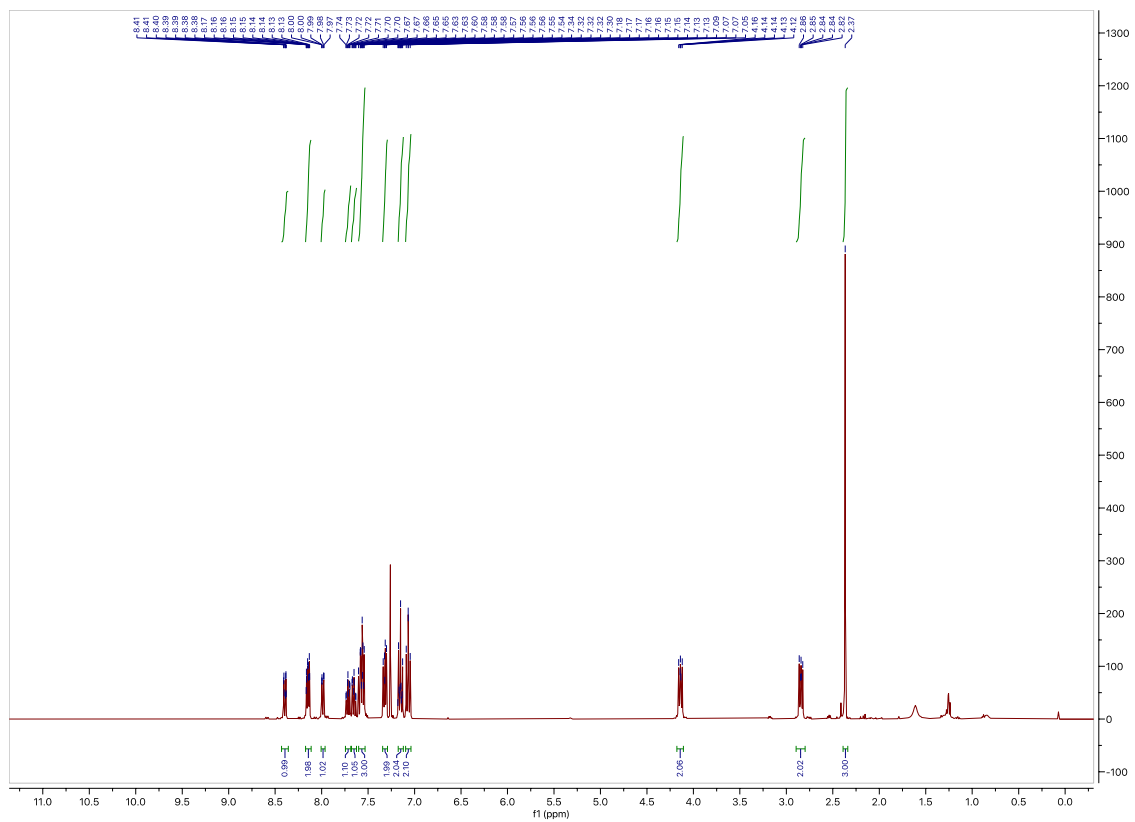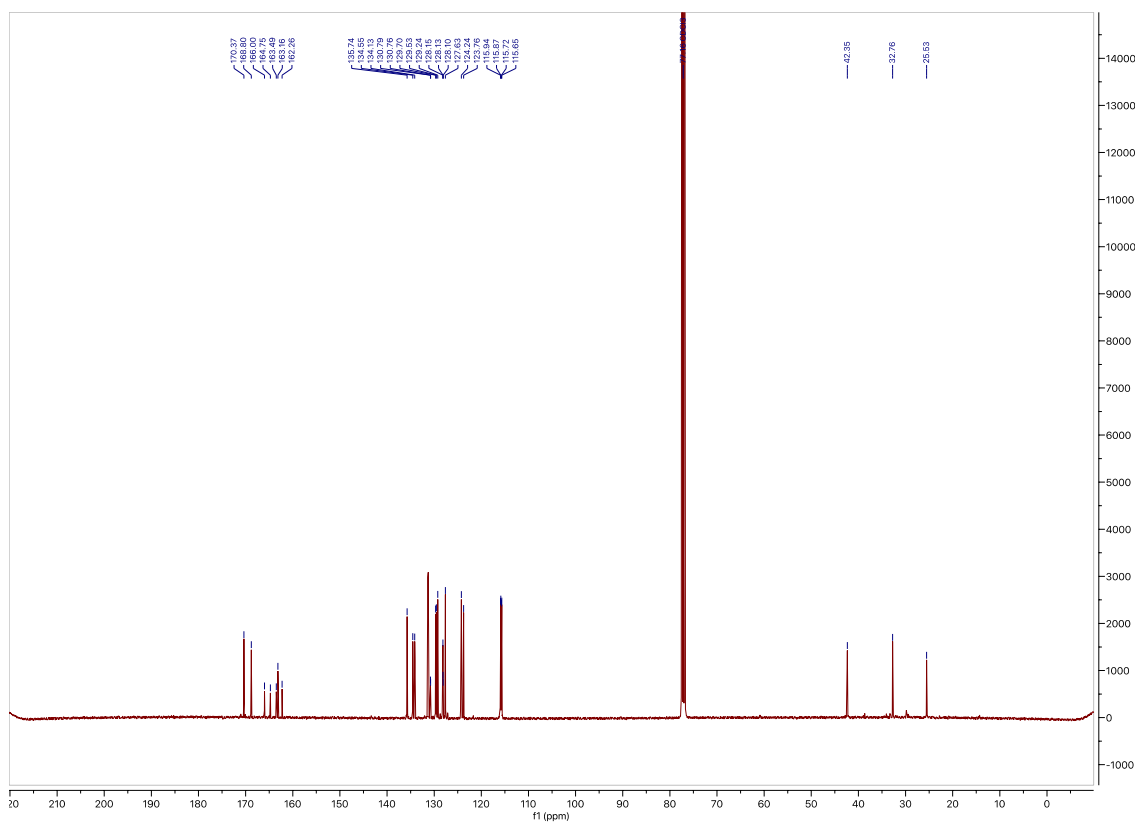



SM 16o

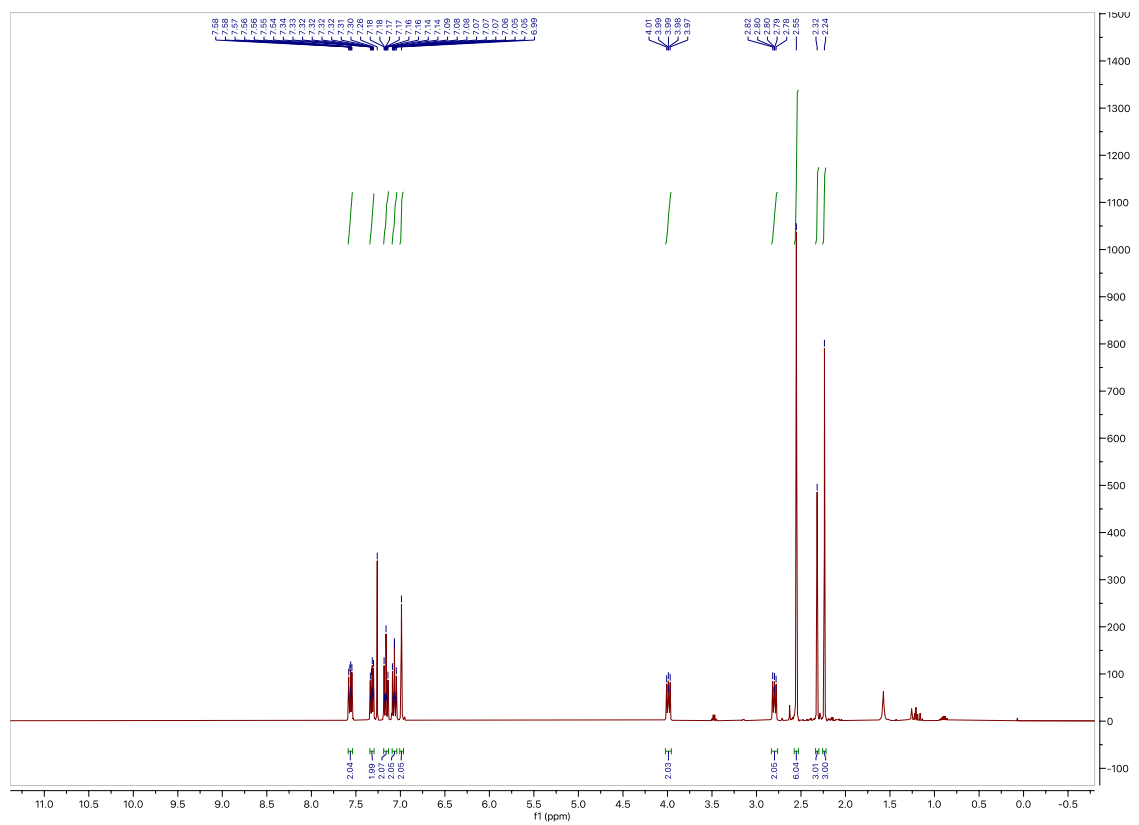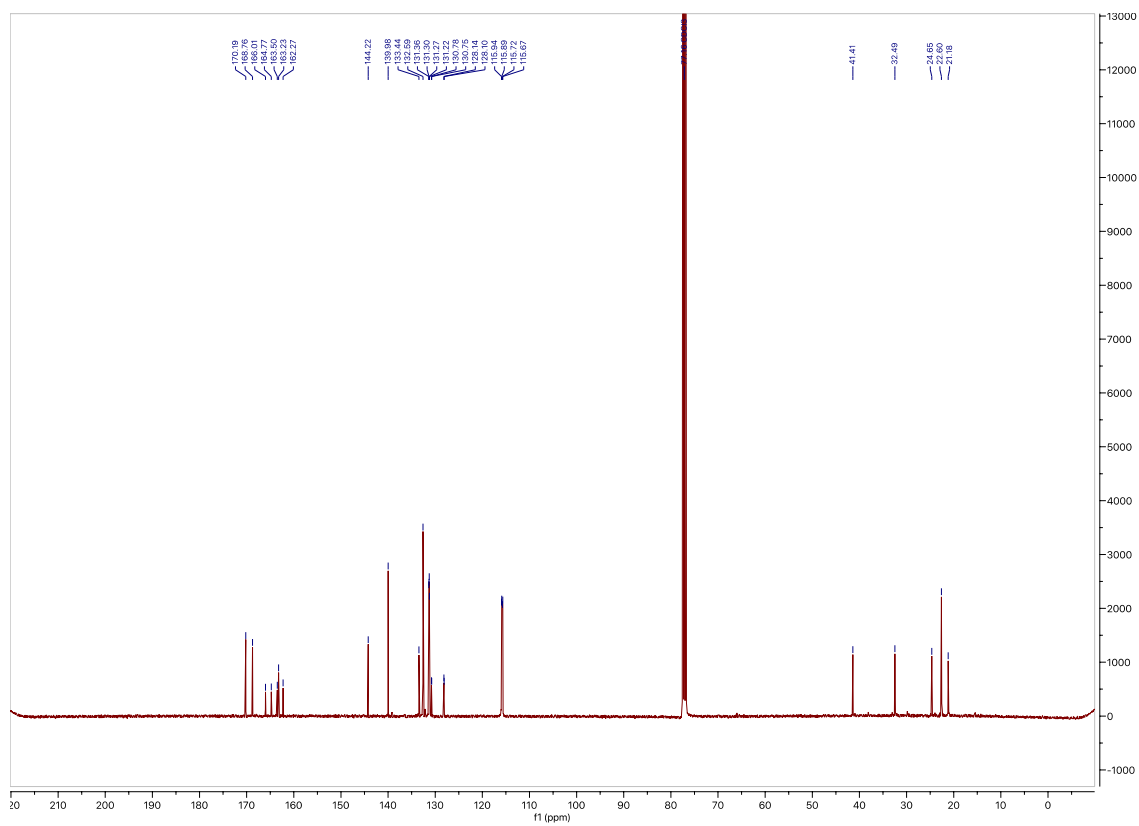

SM 16p

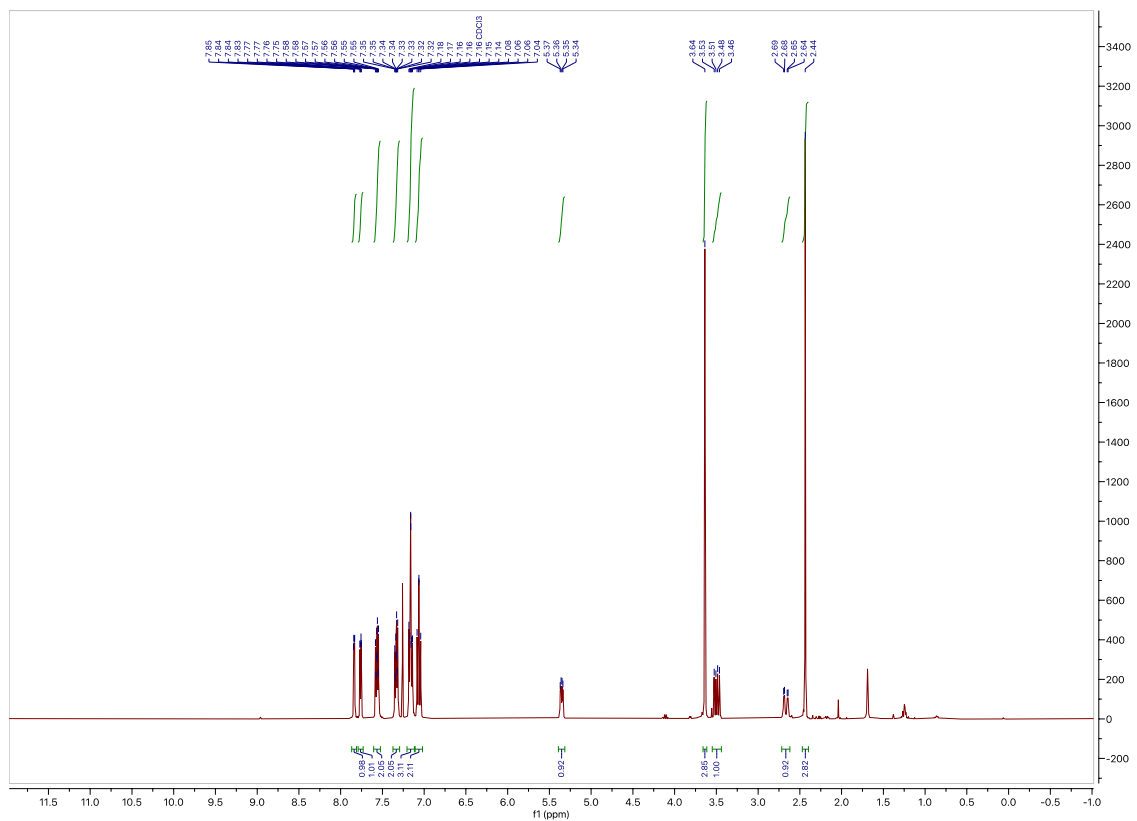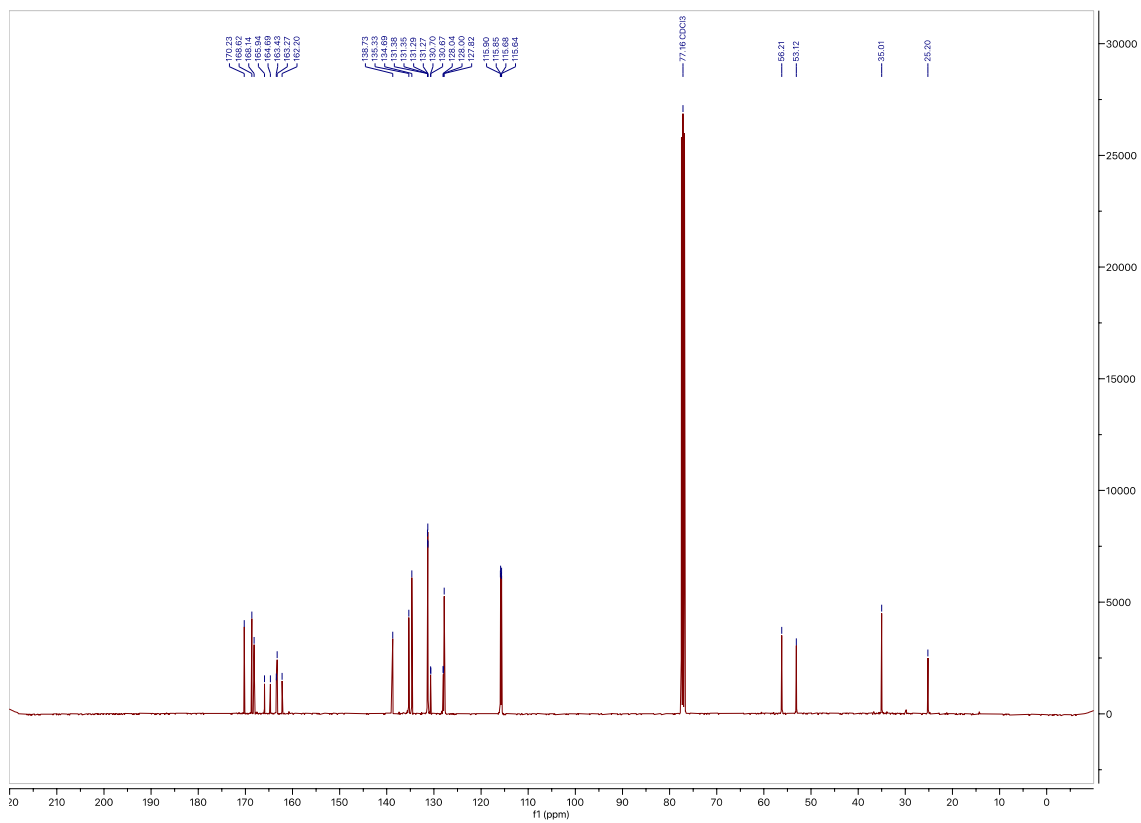

SM rac-16p

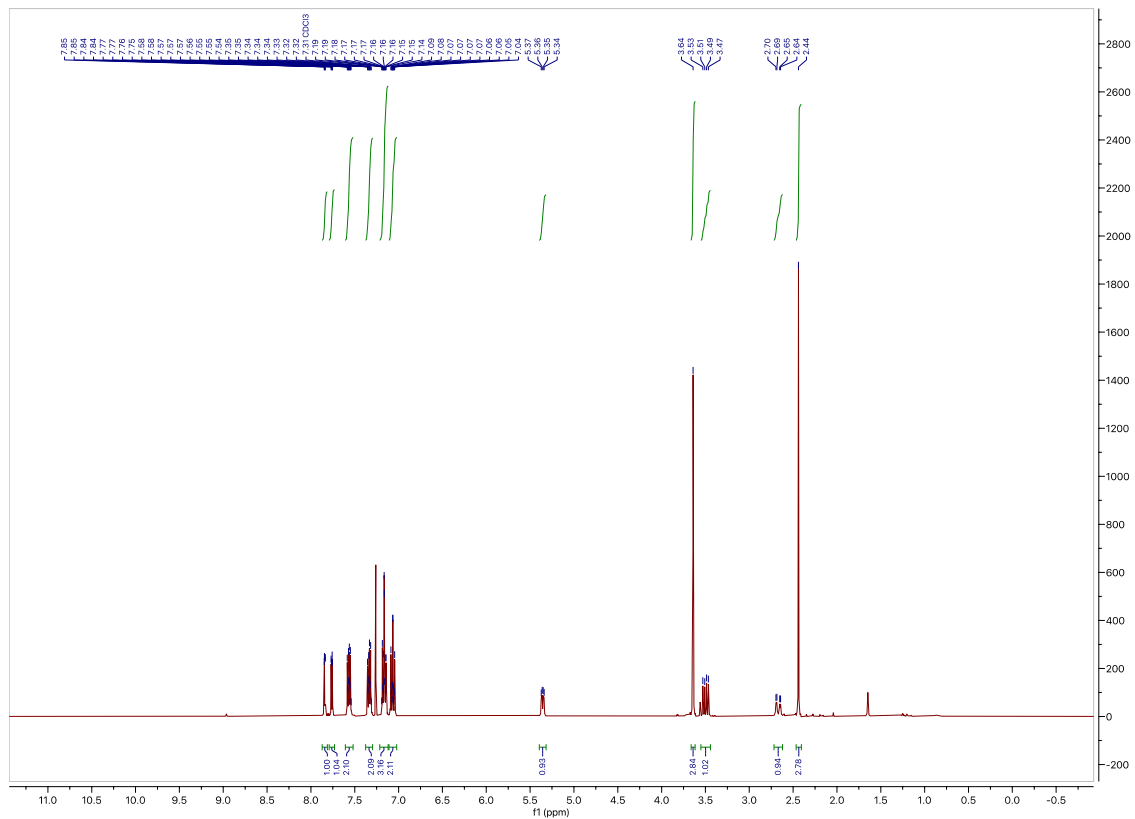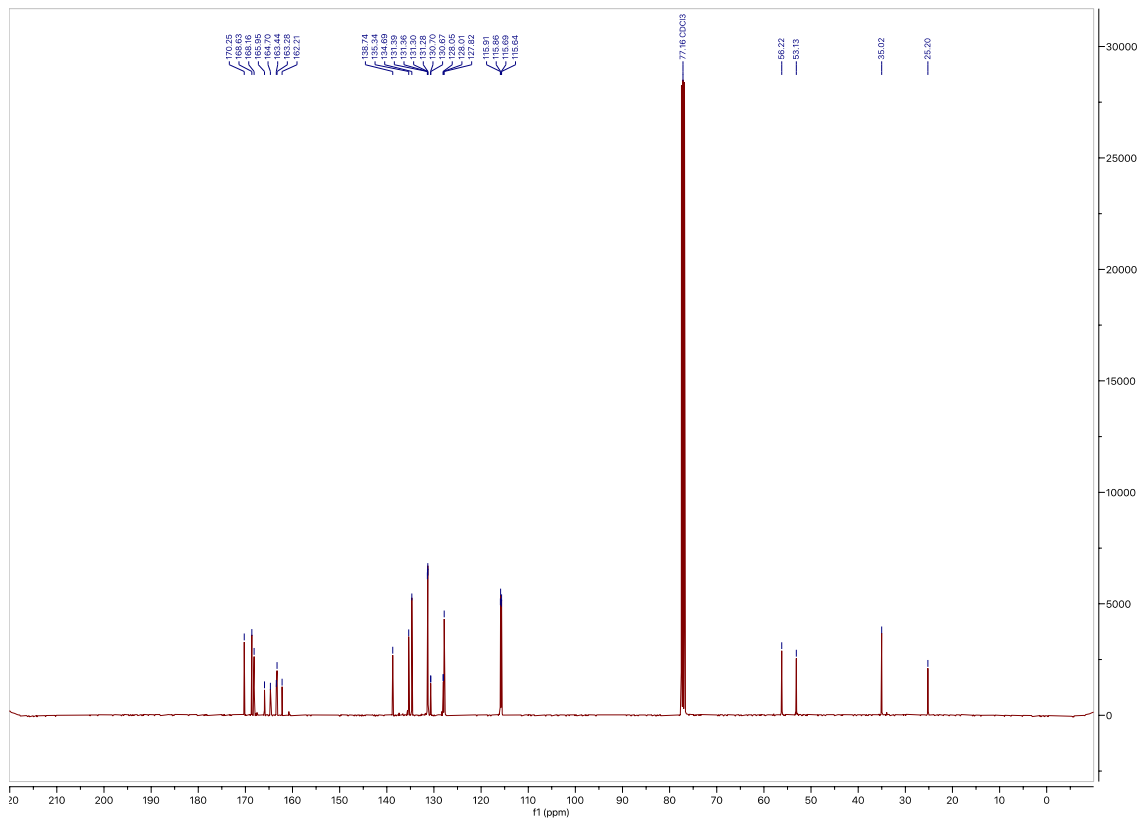

# Product 17a

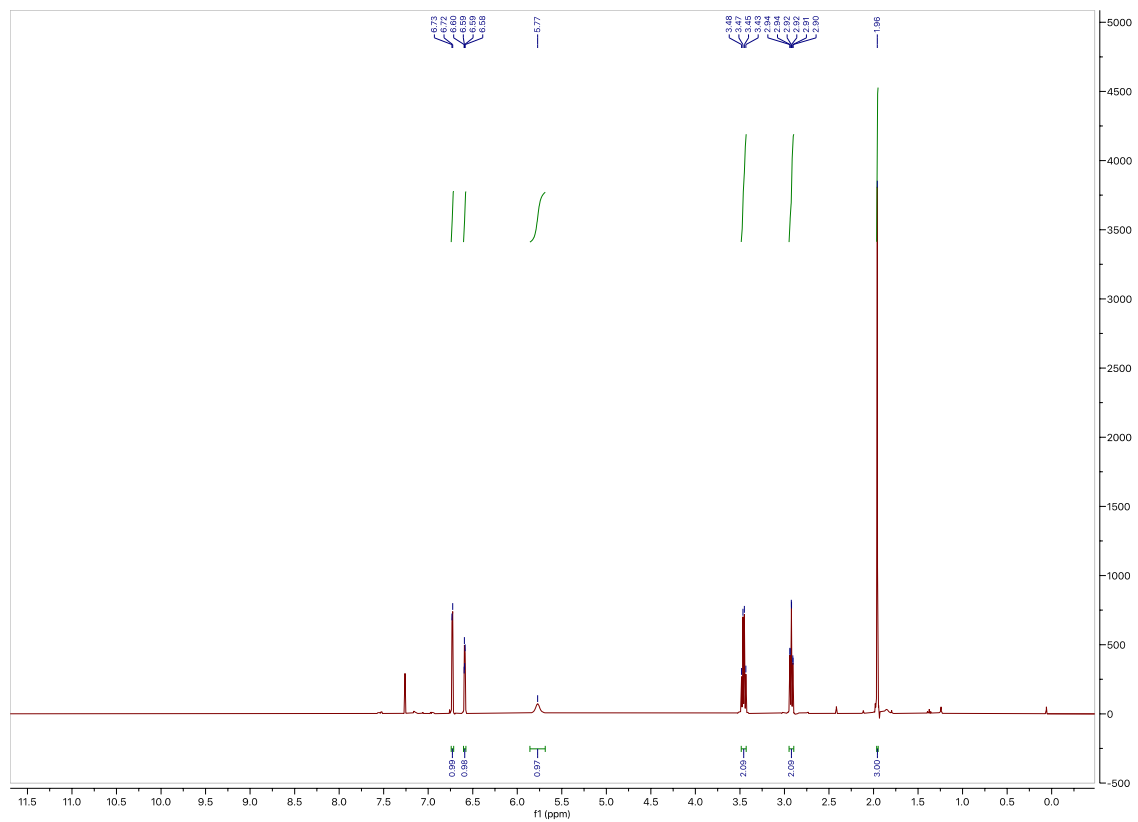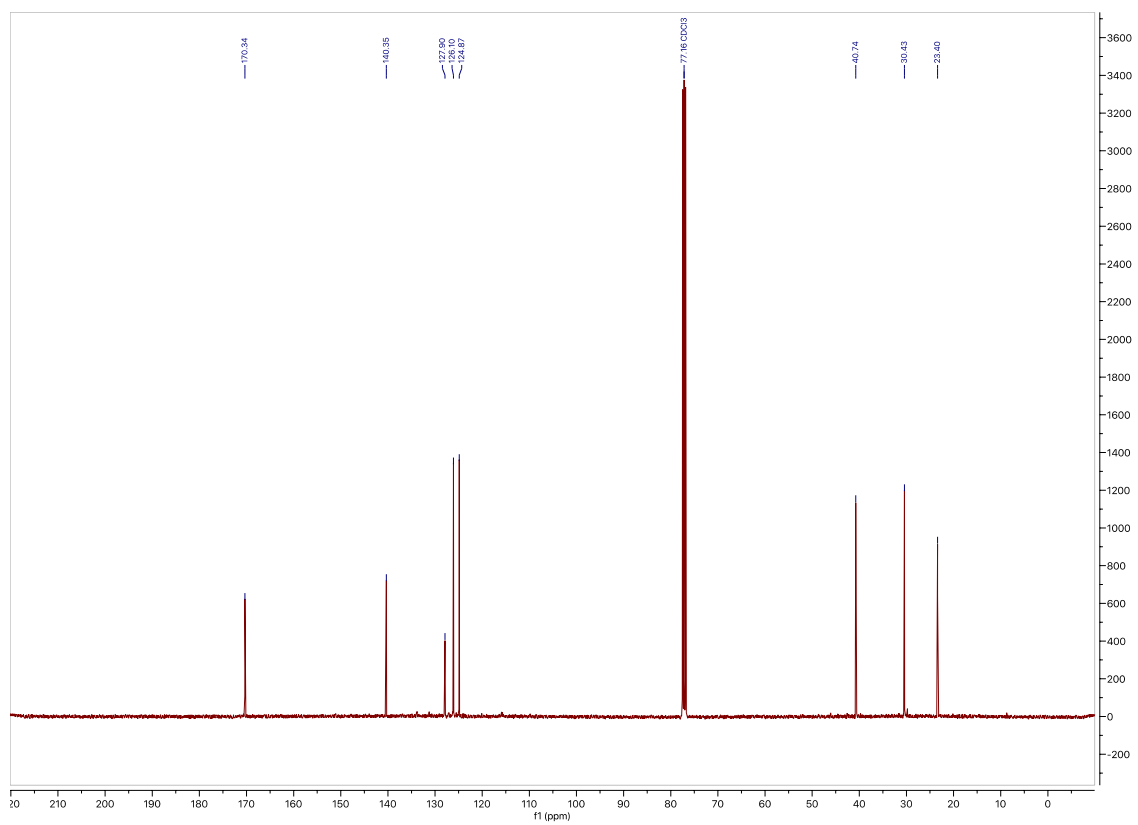

# Product 17b

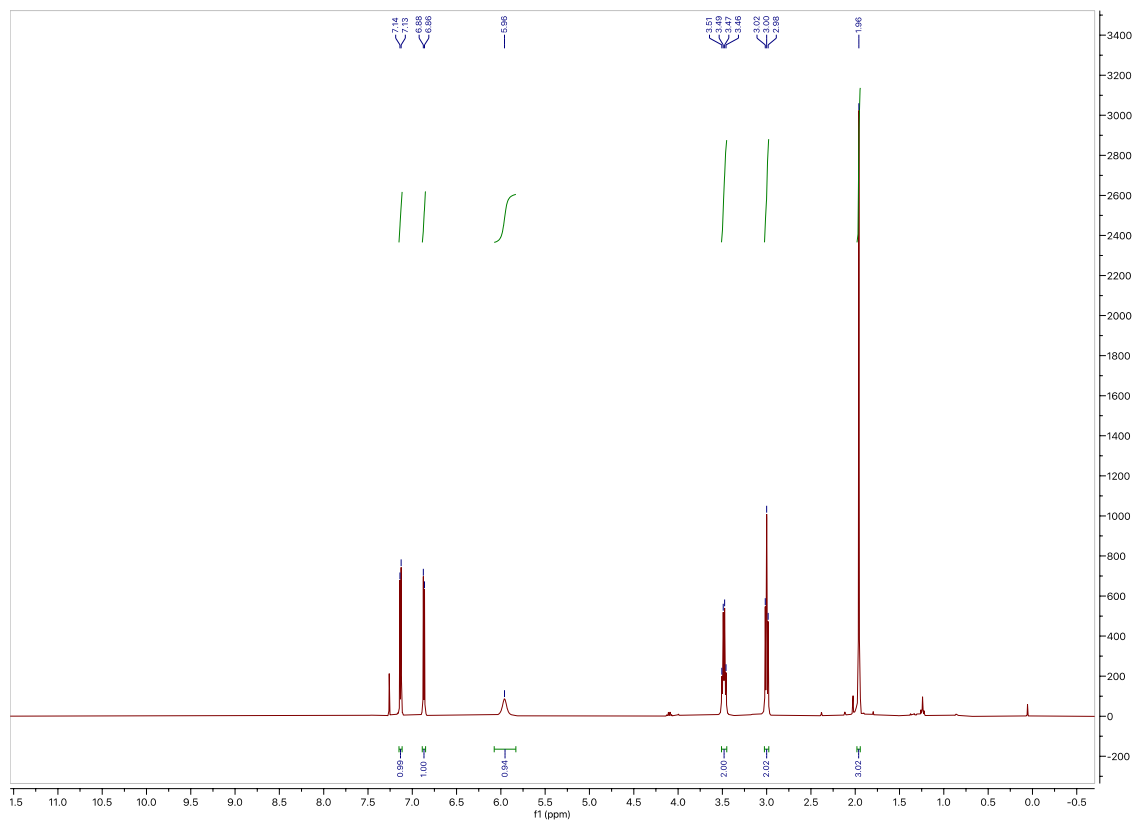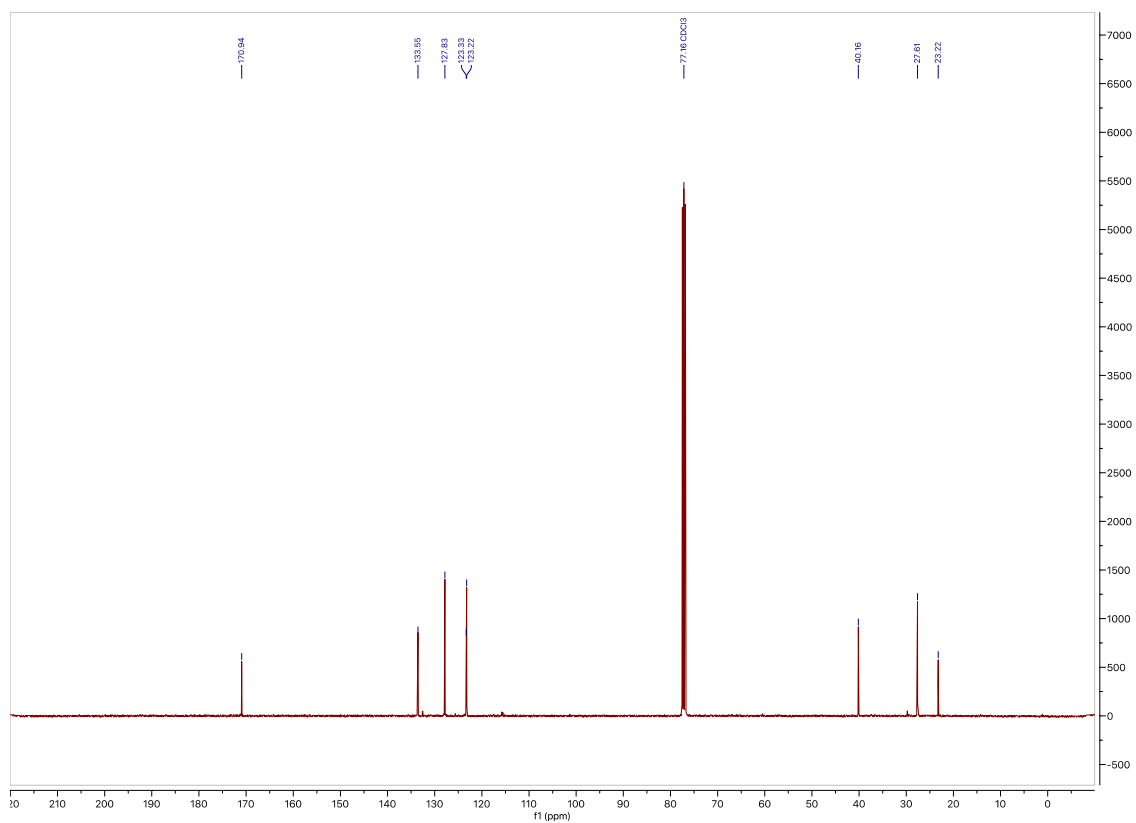

# Product 17c

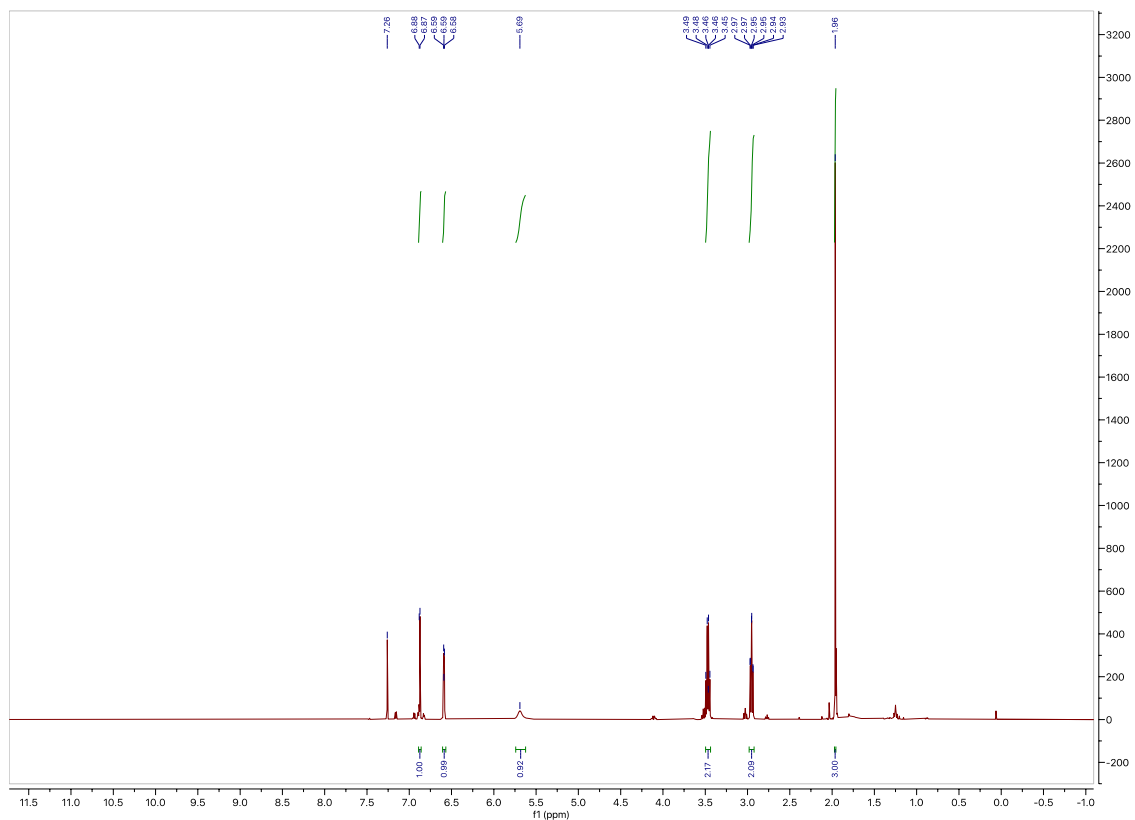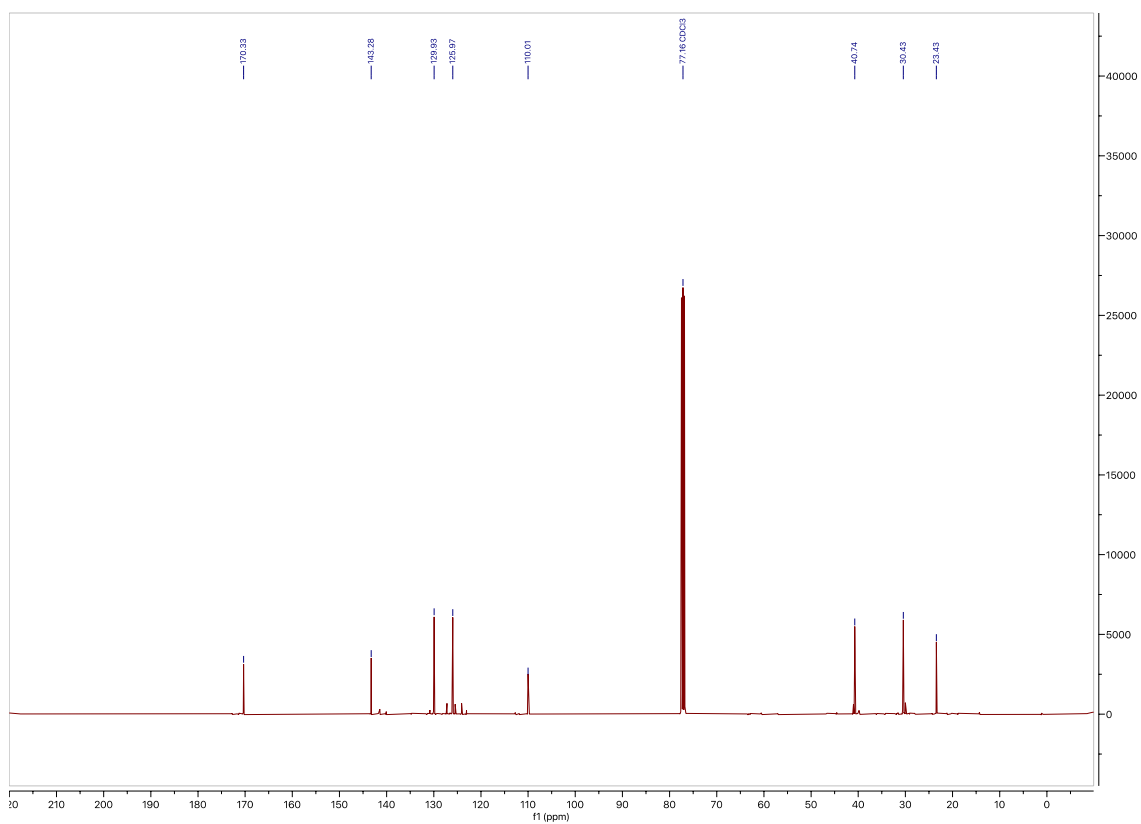

# Product 17d

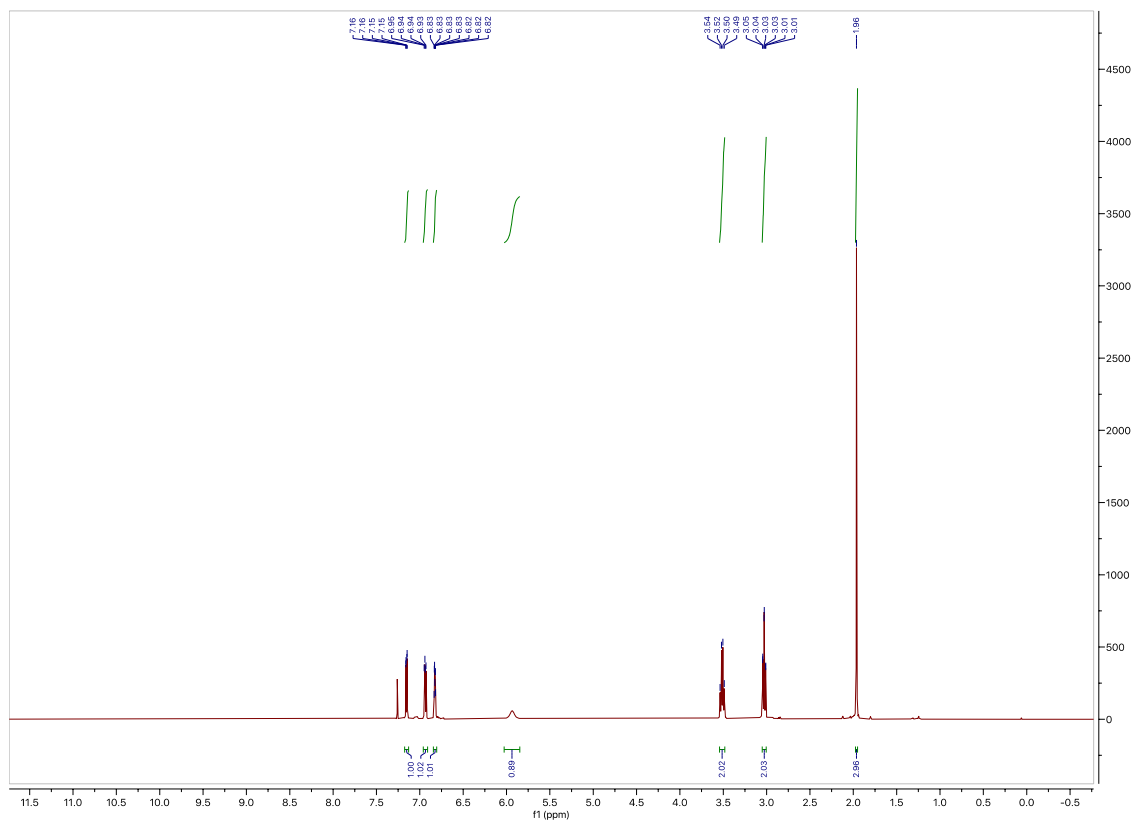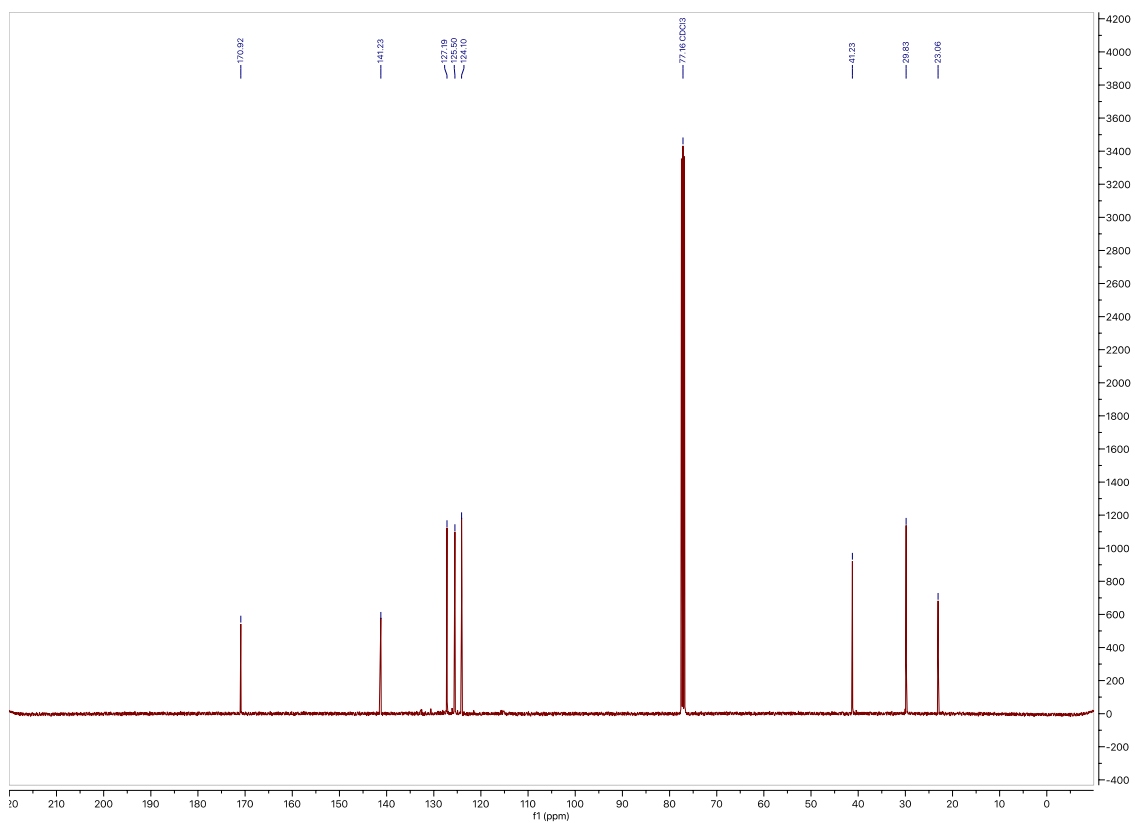

# Product 17f

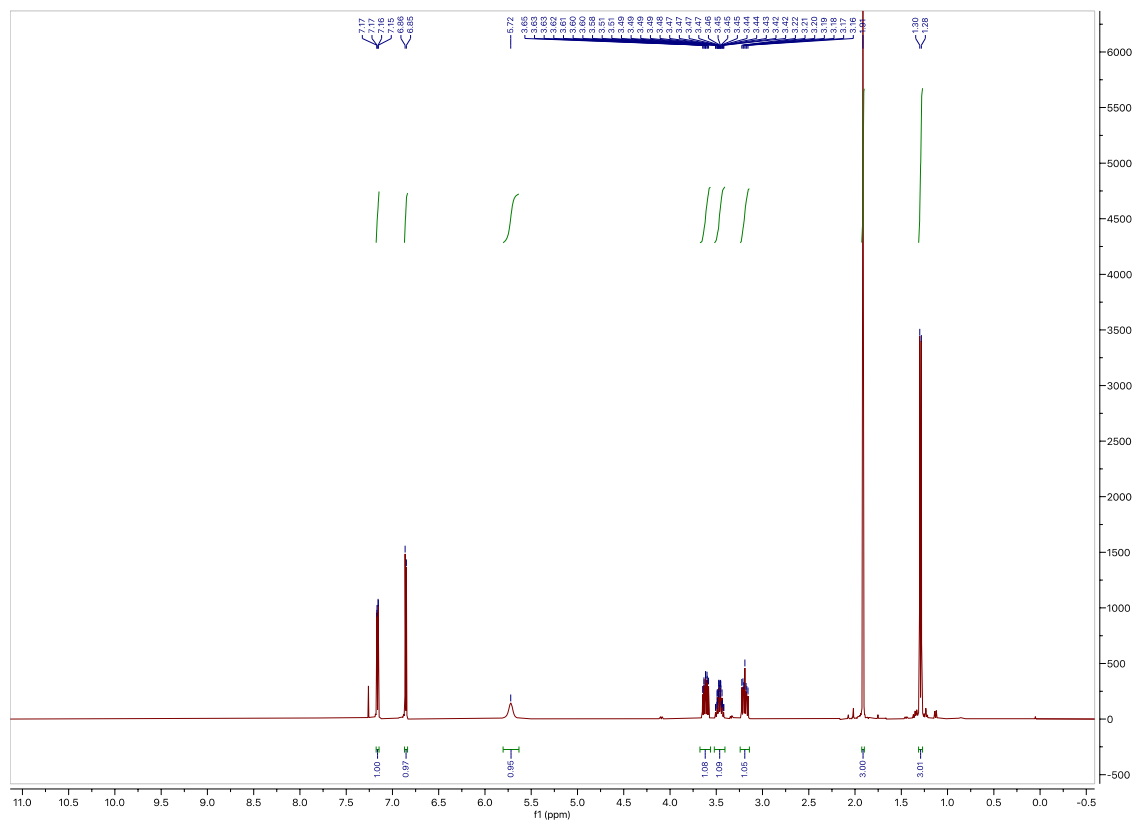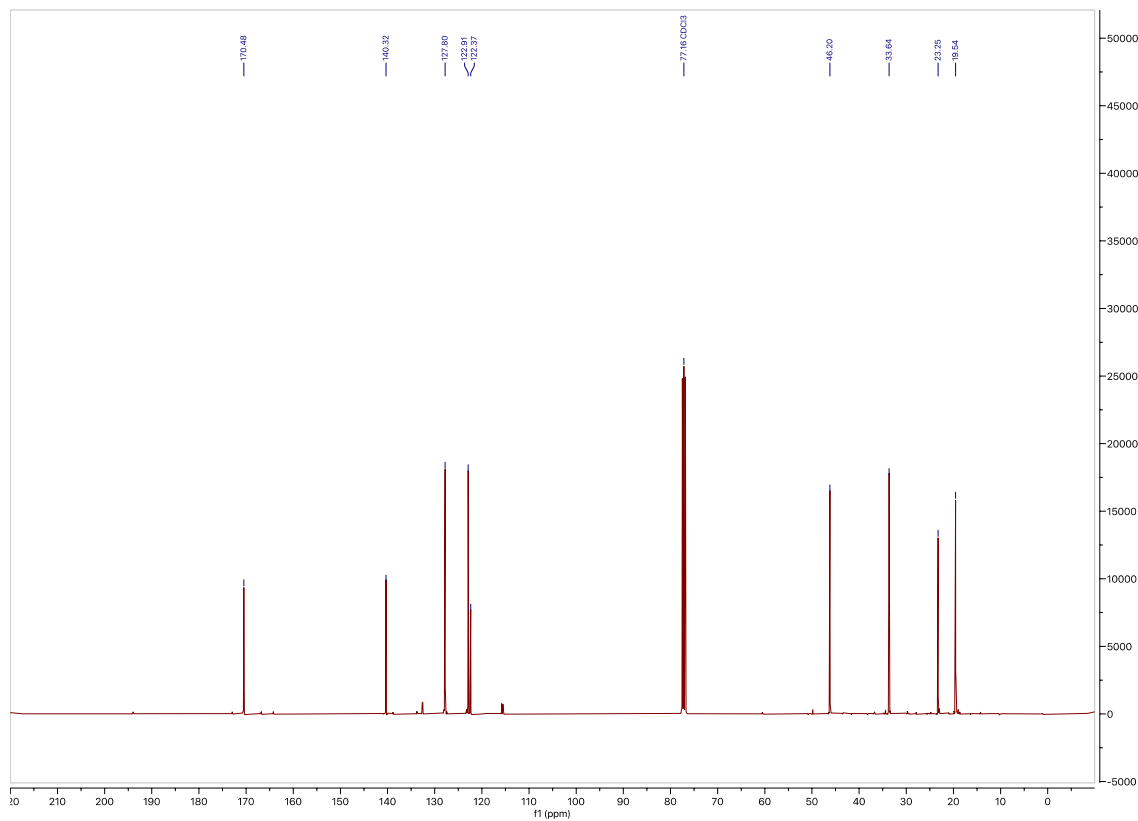



# Product 17g

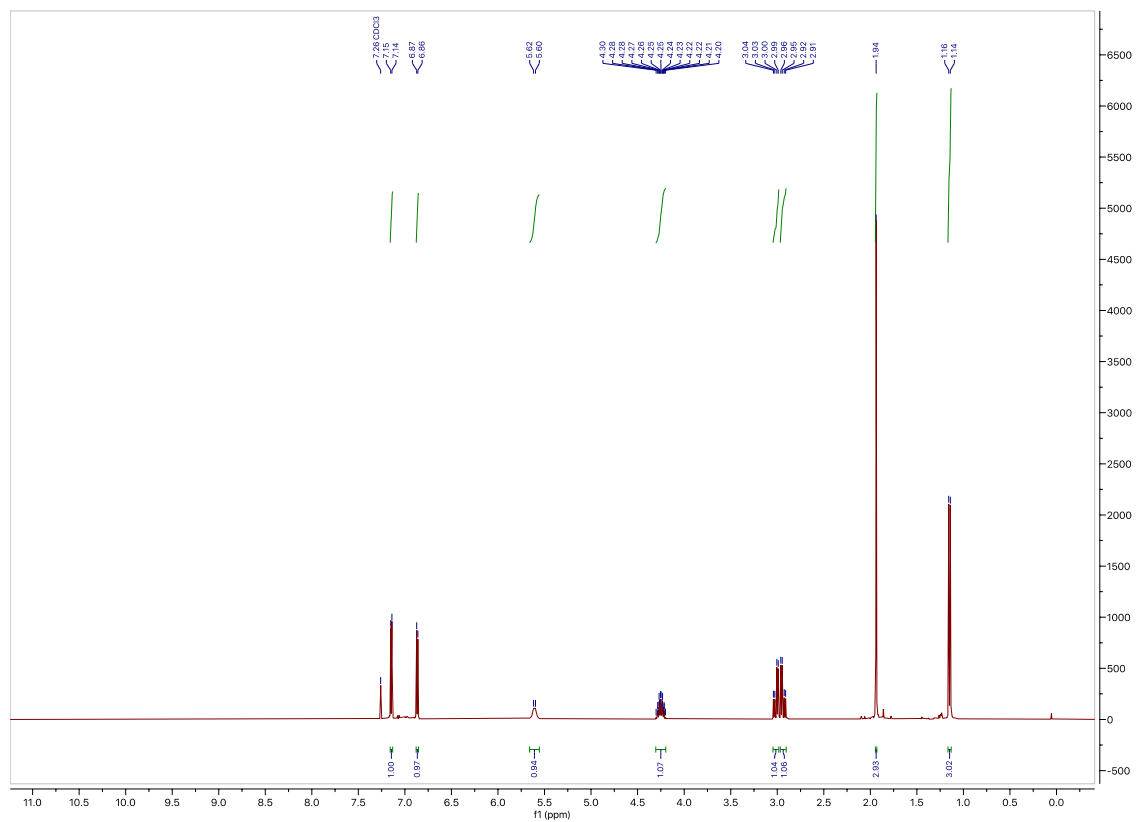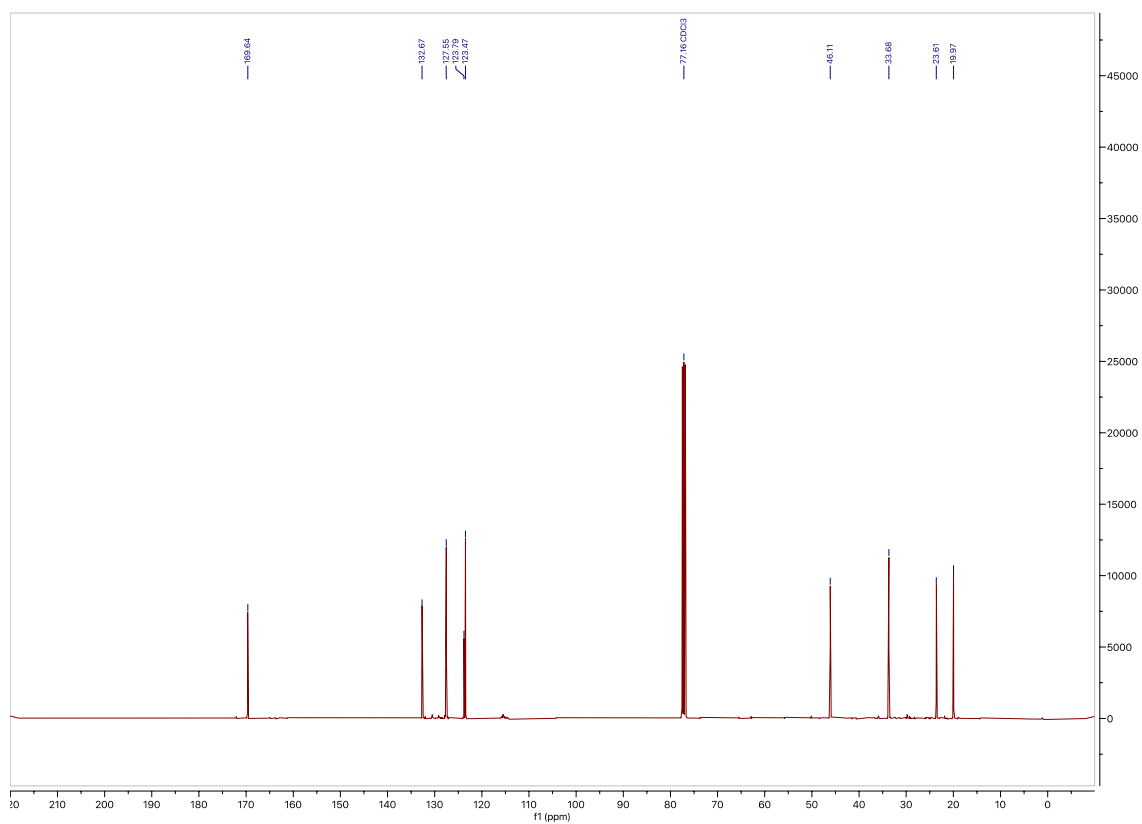

# Product S-17g

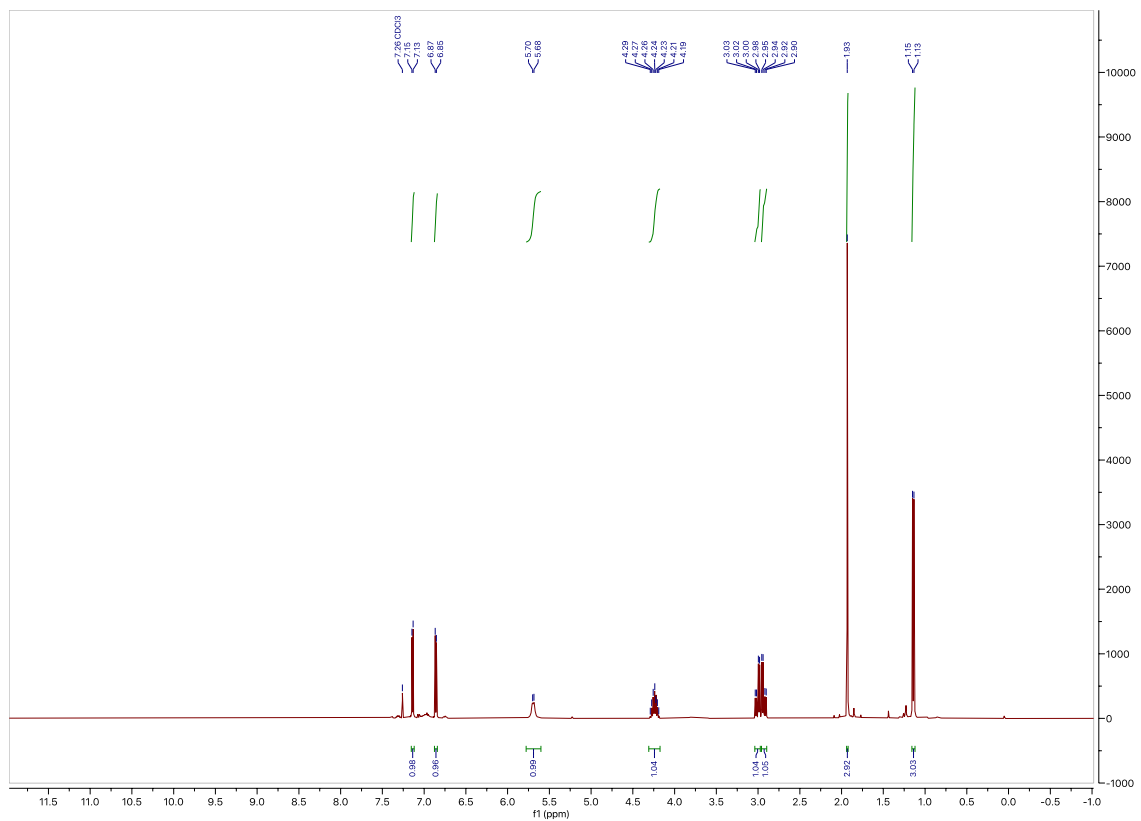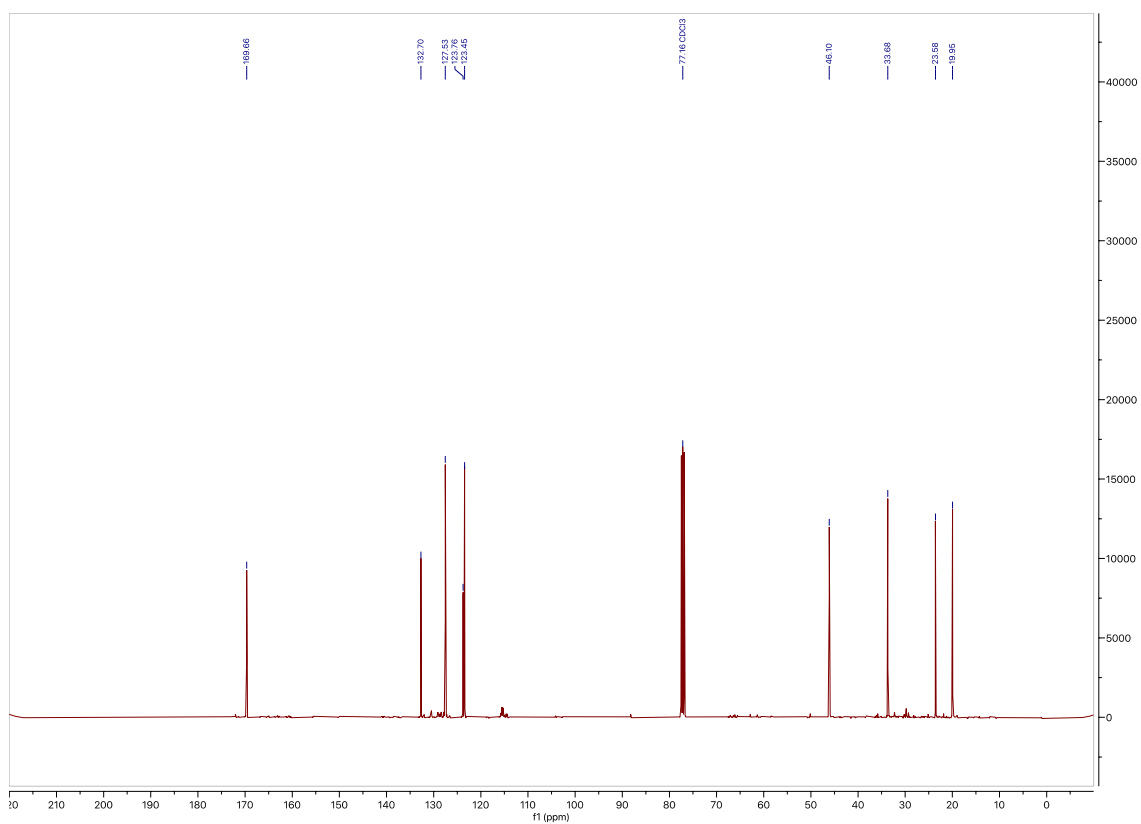

Product R-17g

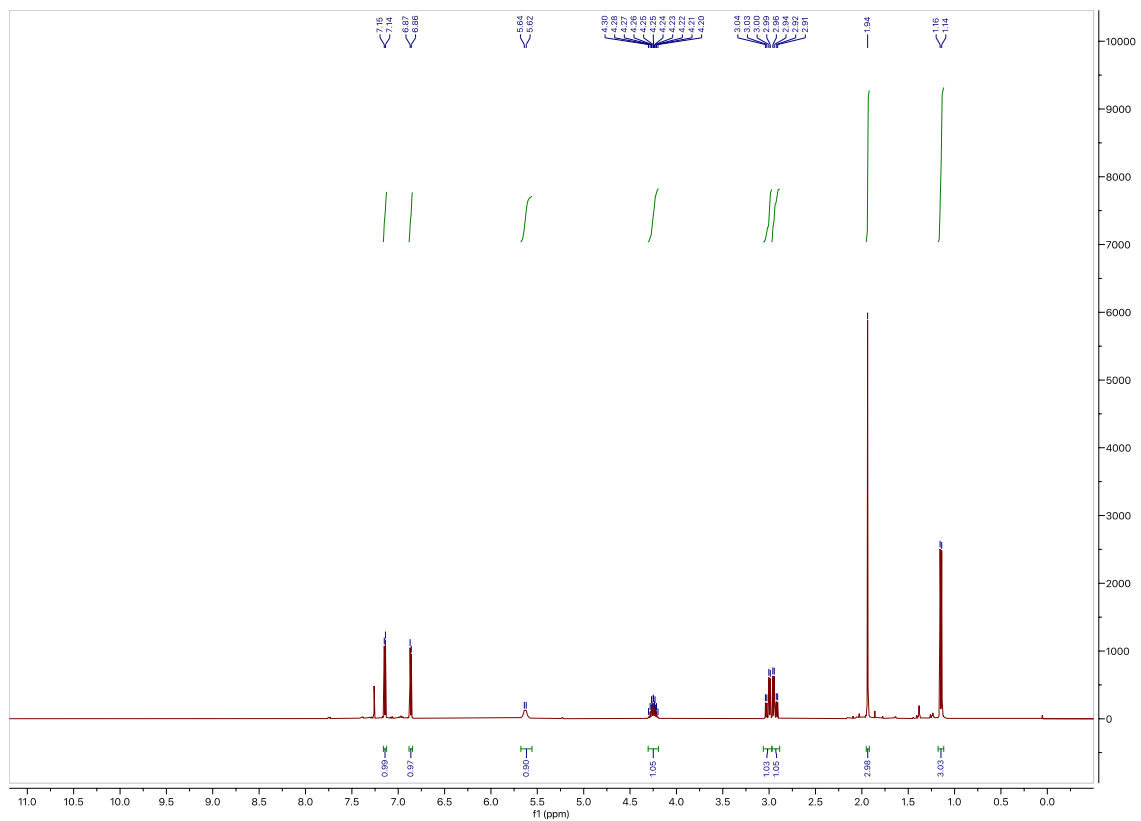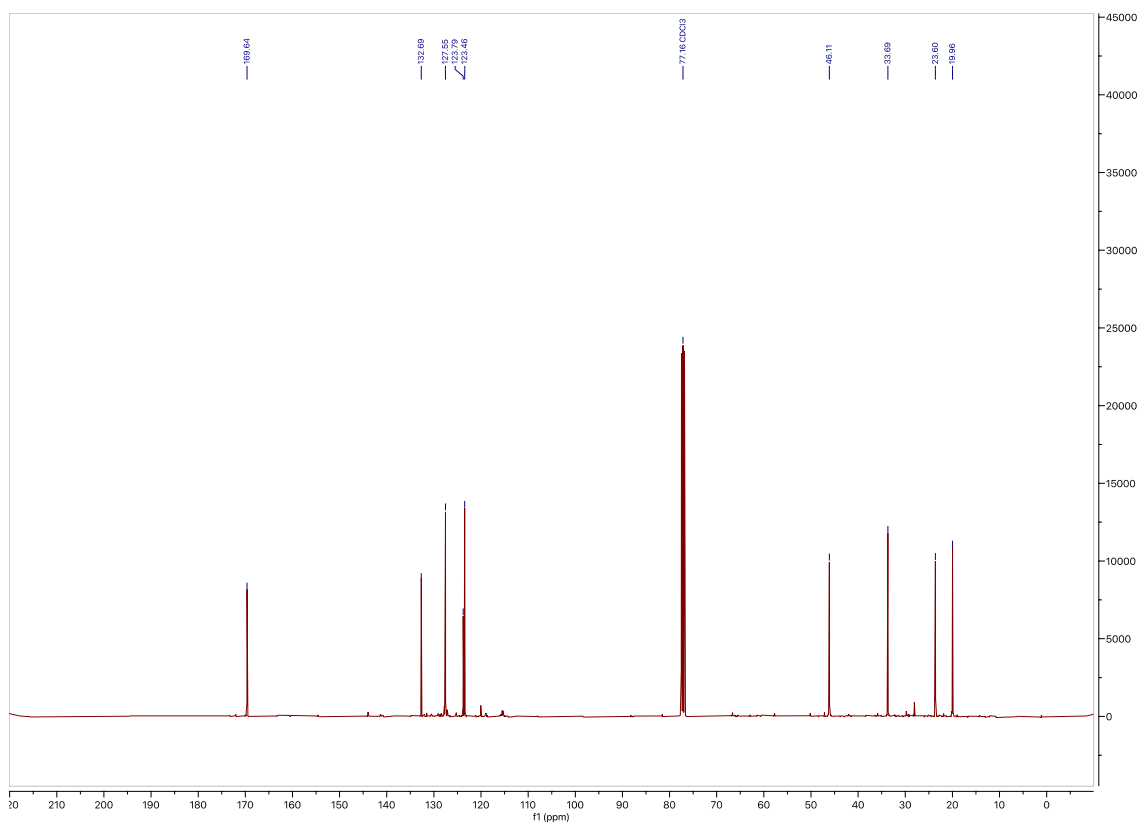



# Product 17i

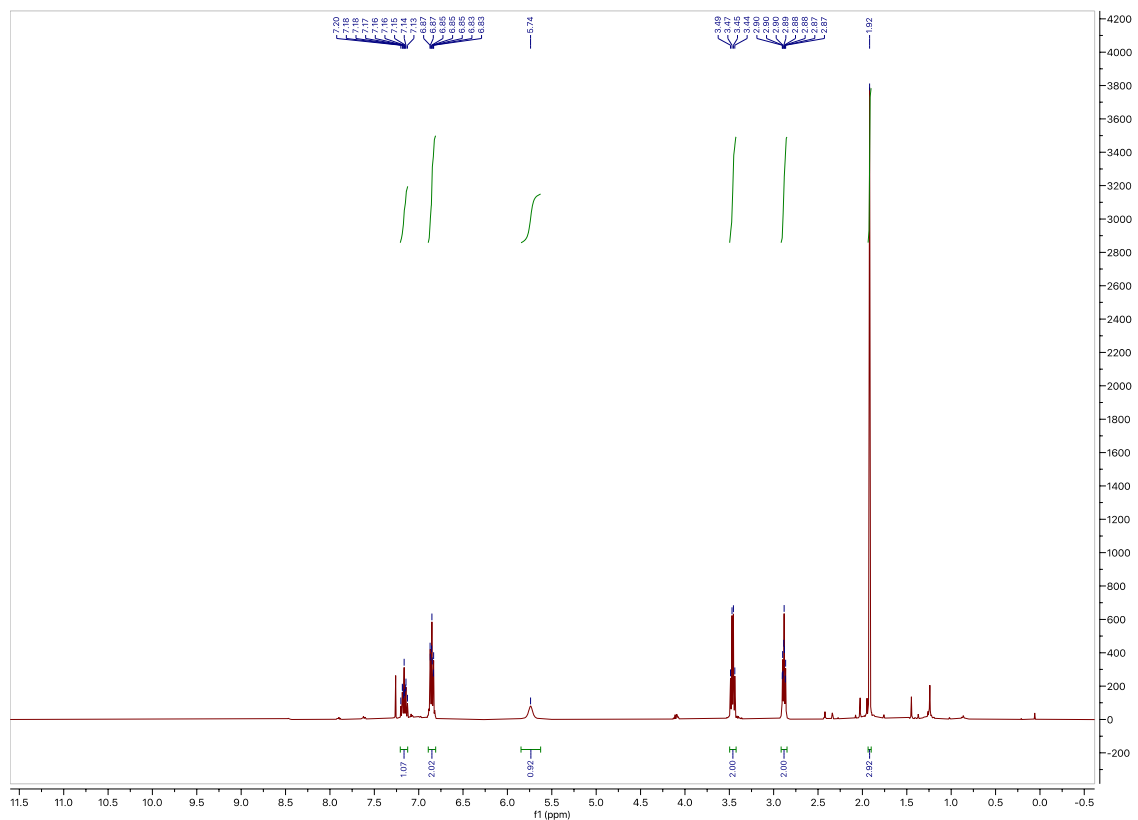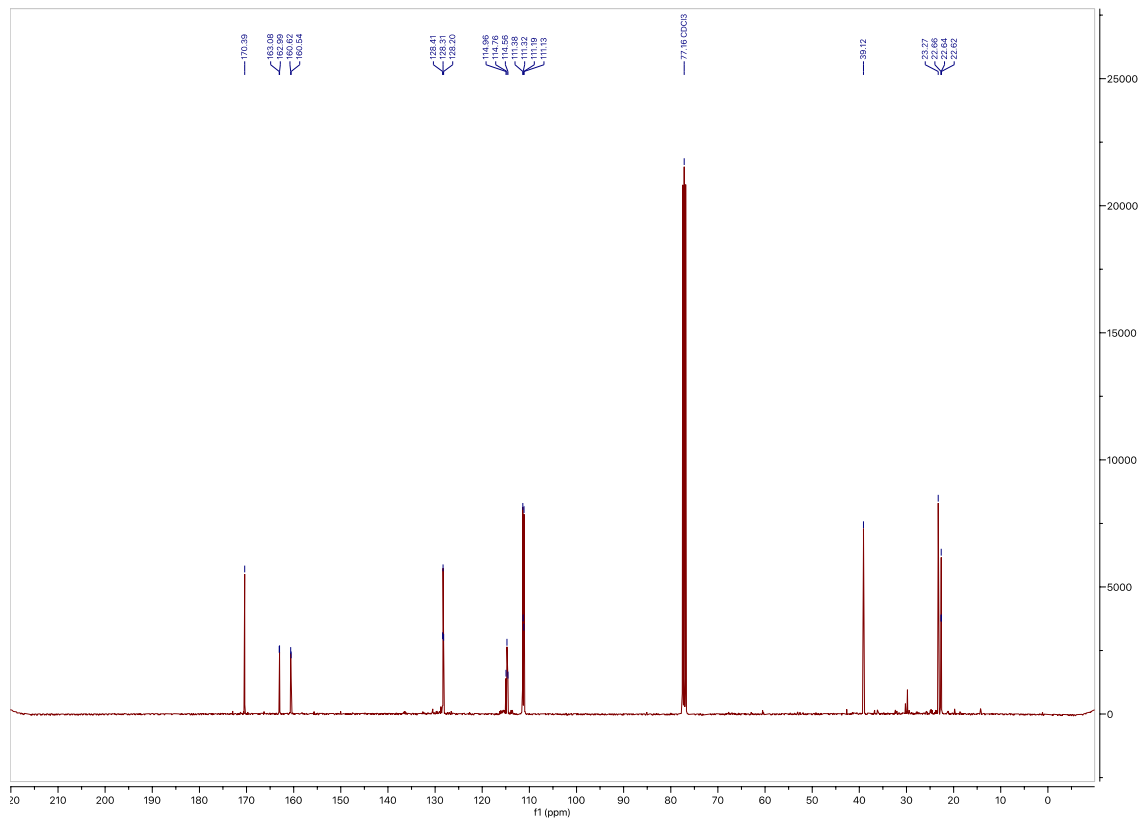

Product 17j

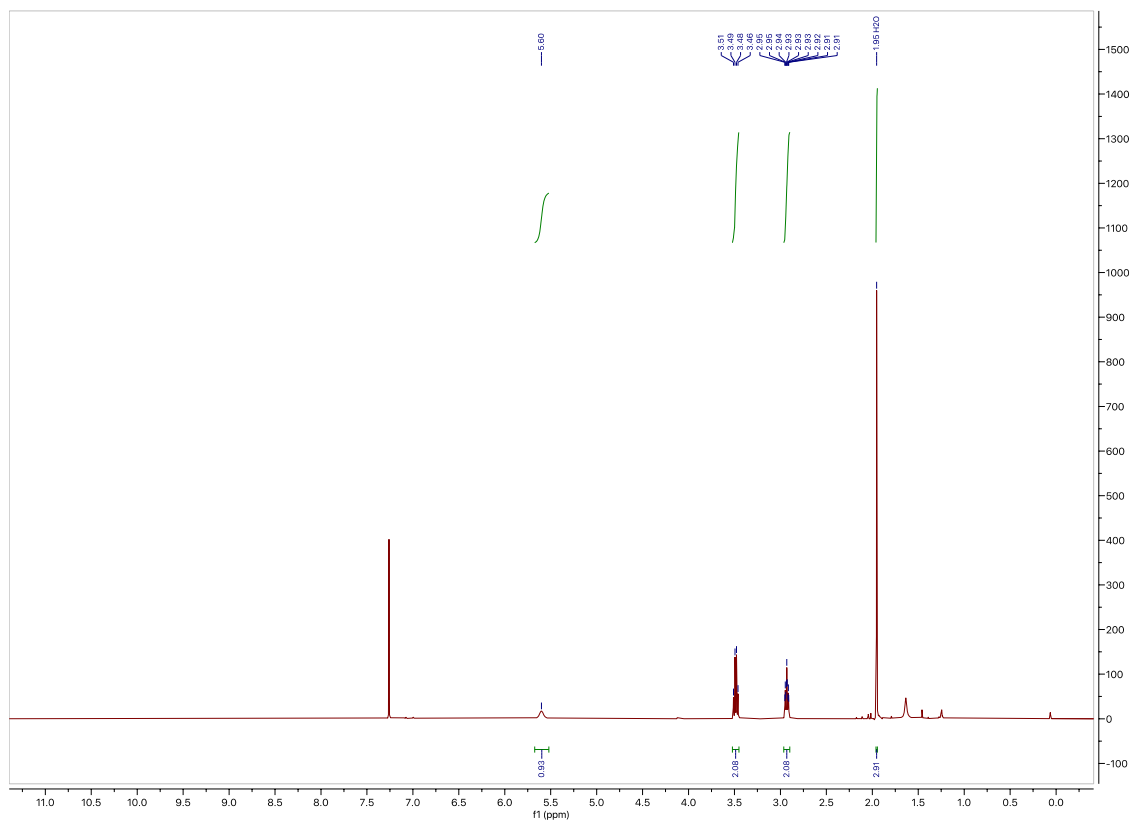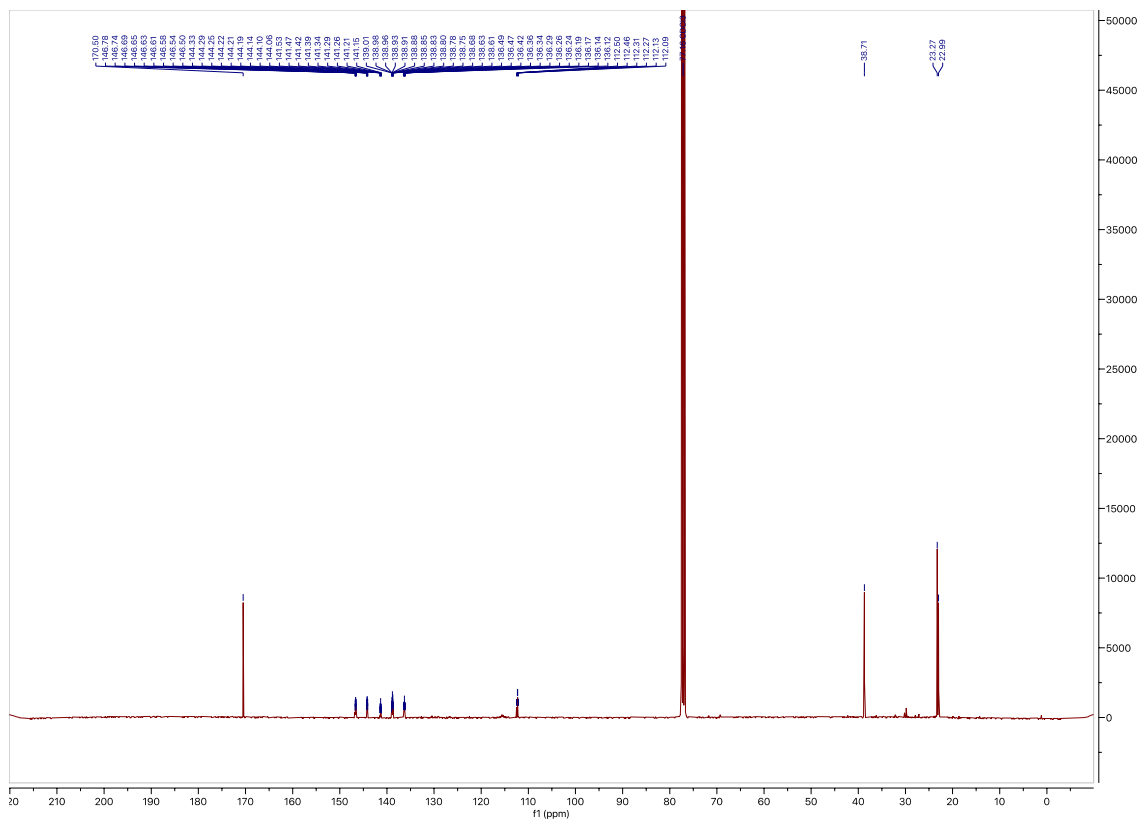

Product 17k

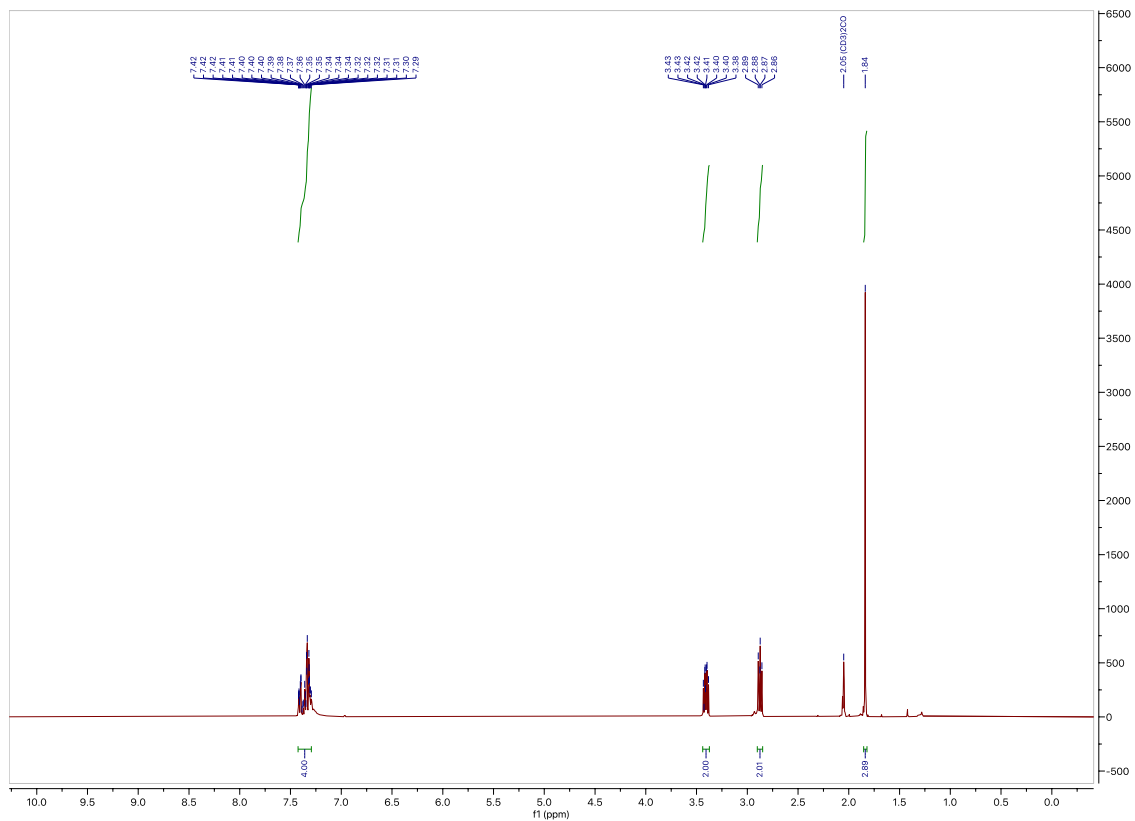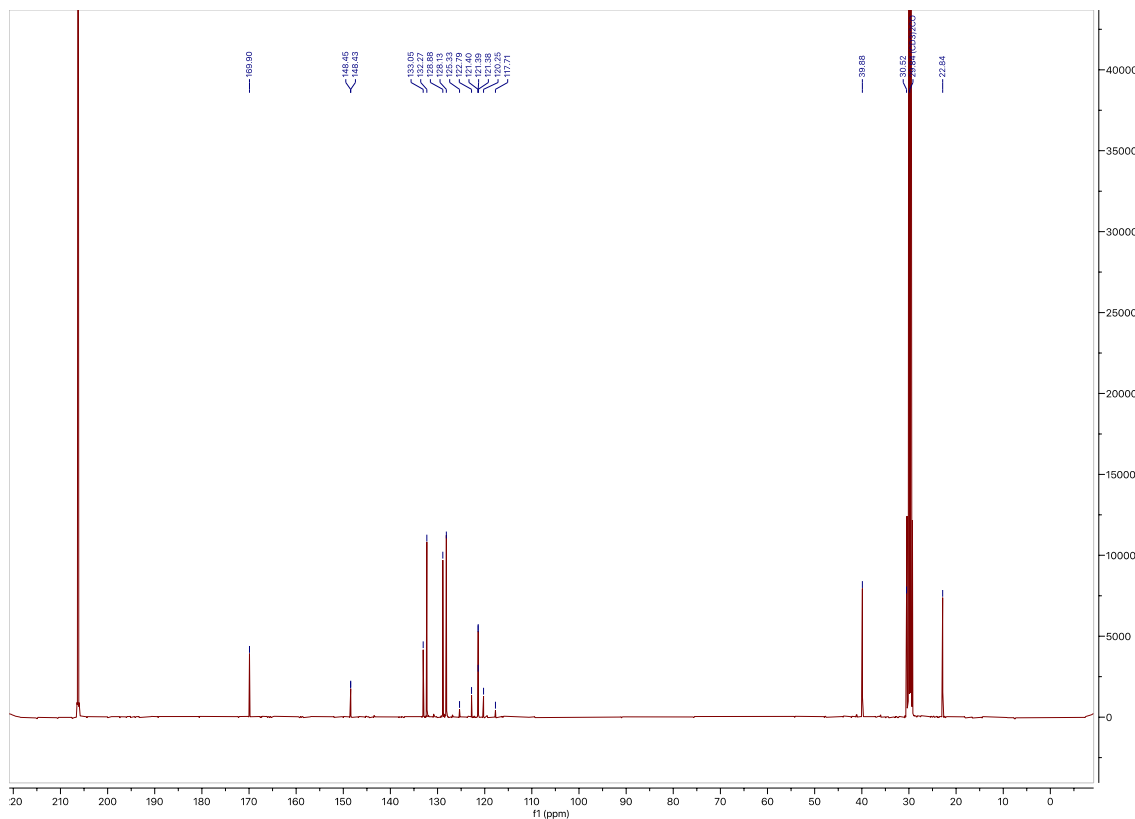

Product 17I

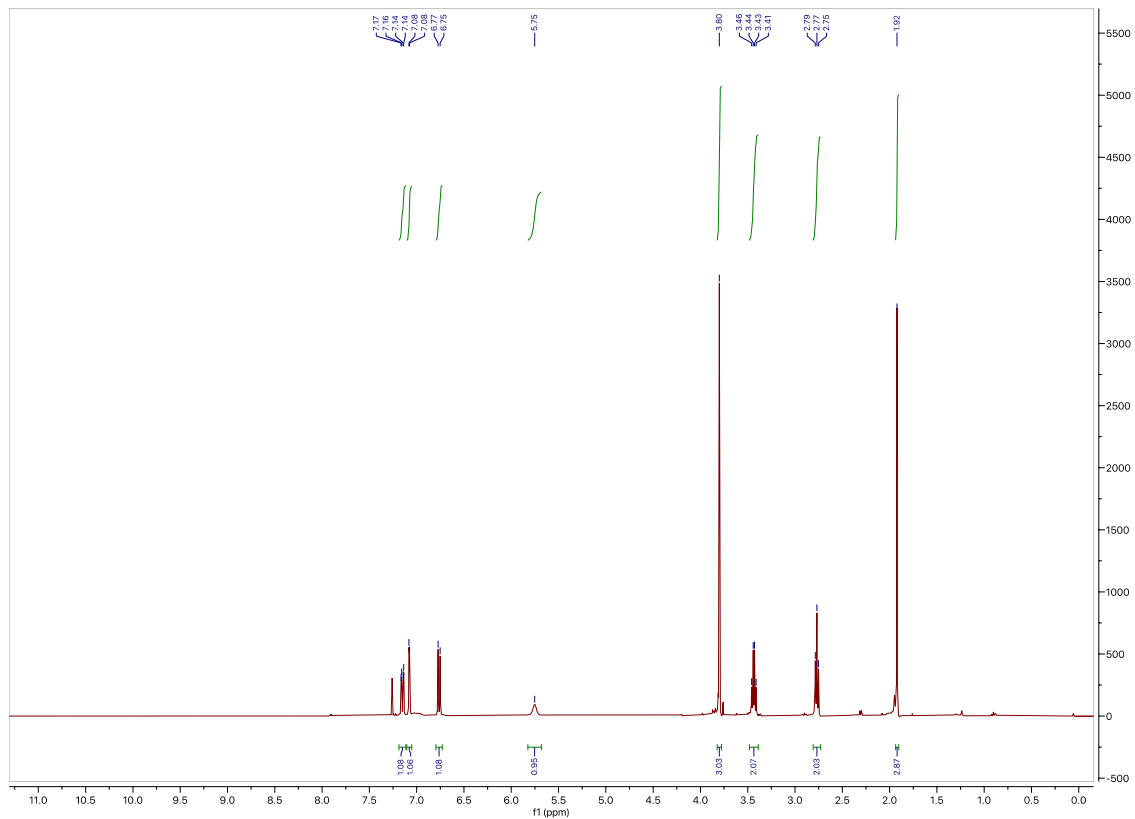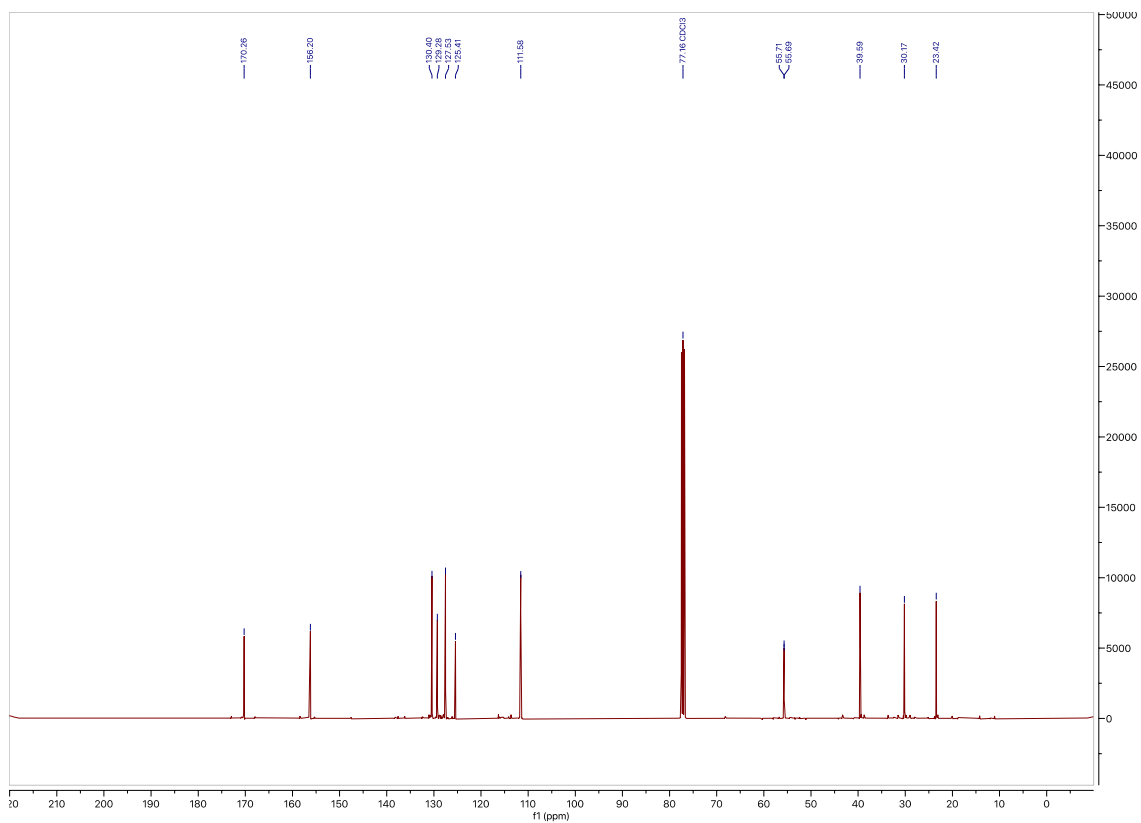



Product 17m

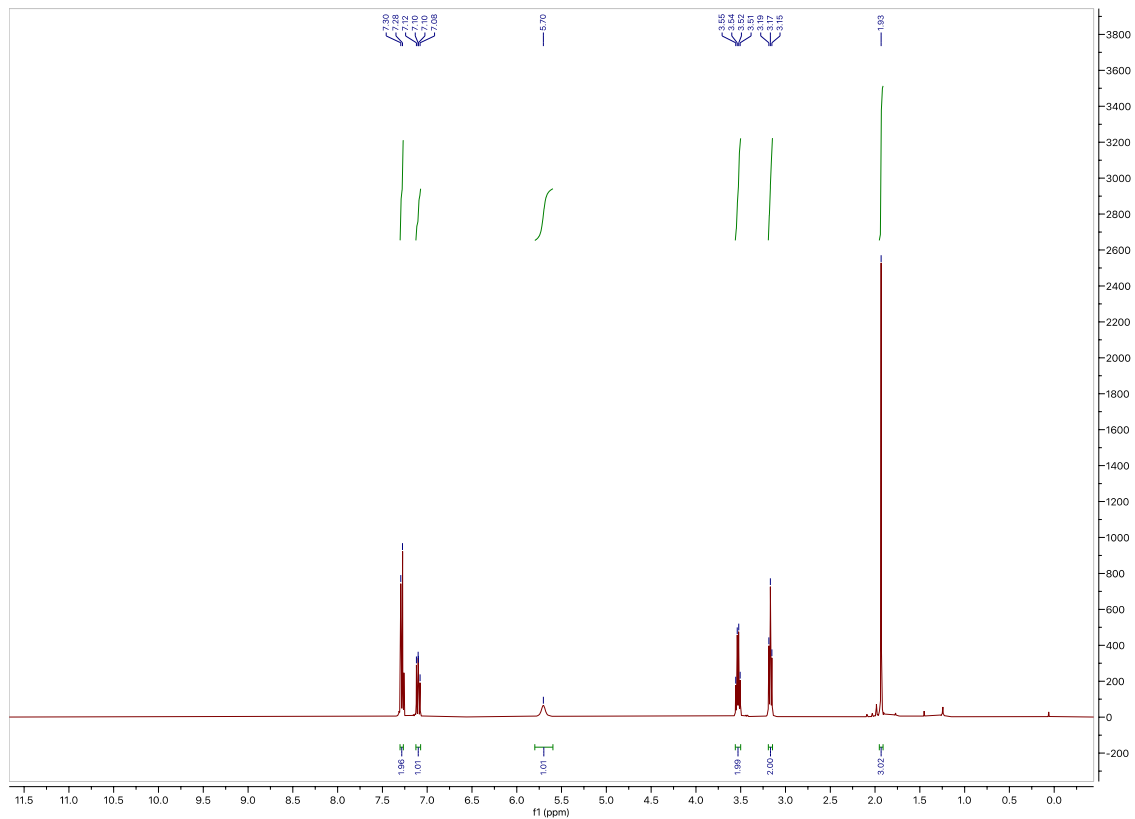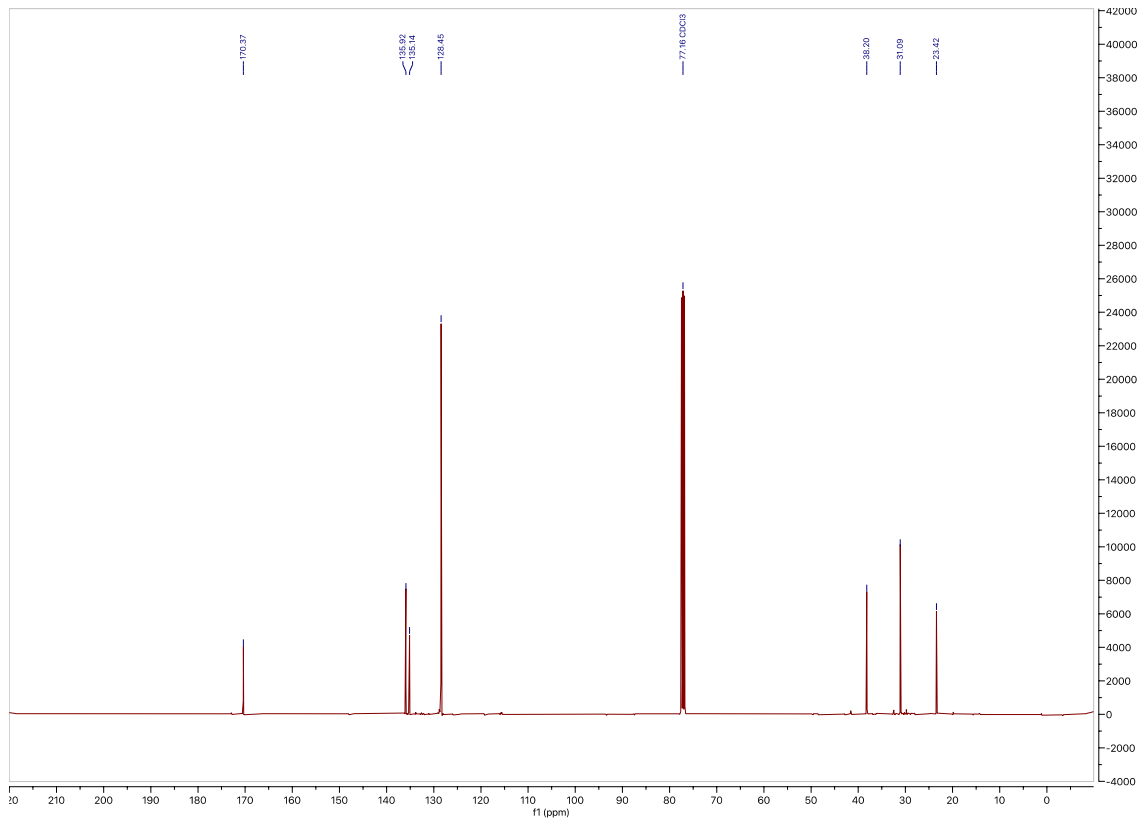

# Product 17n

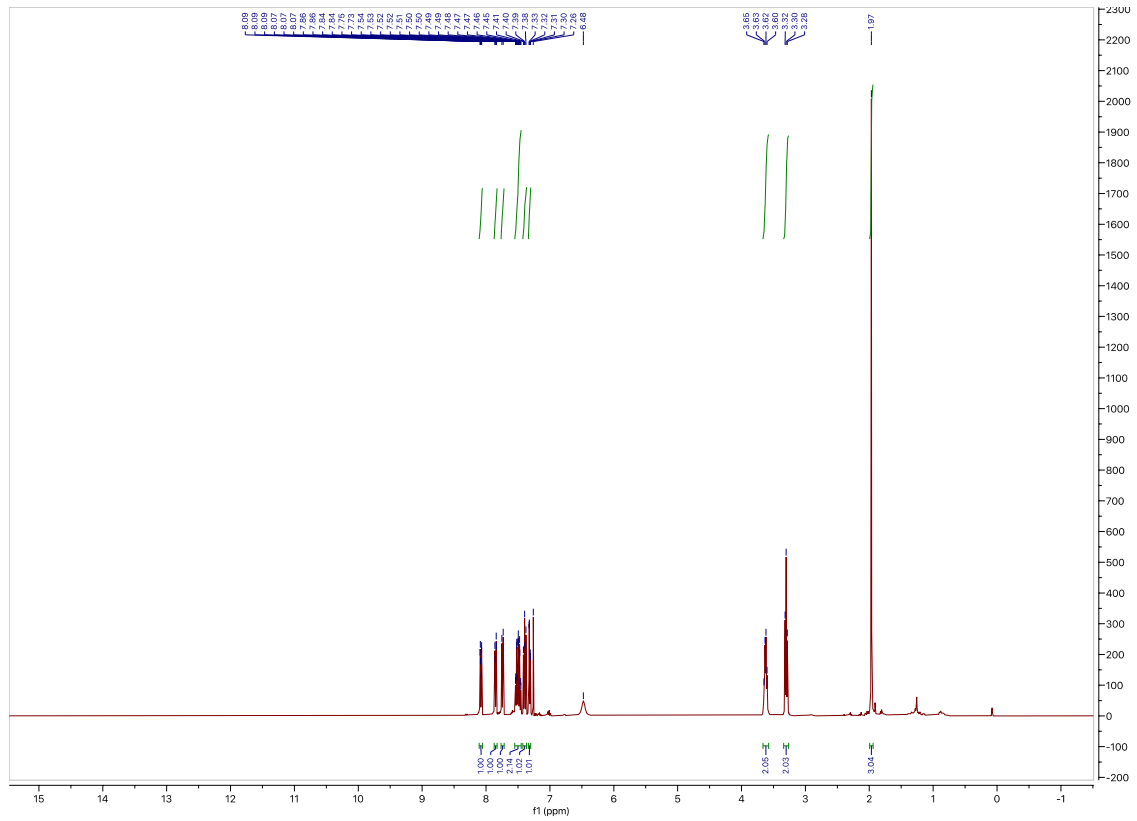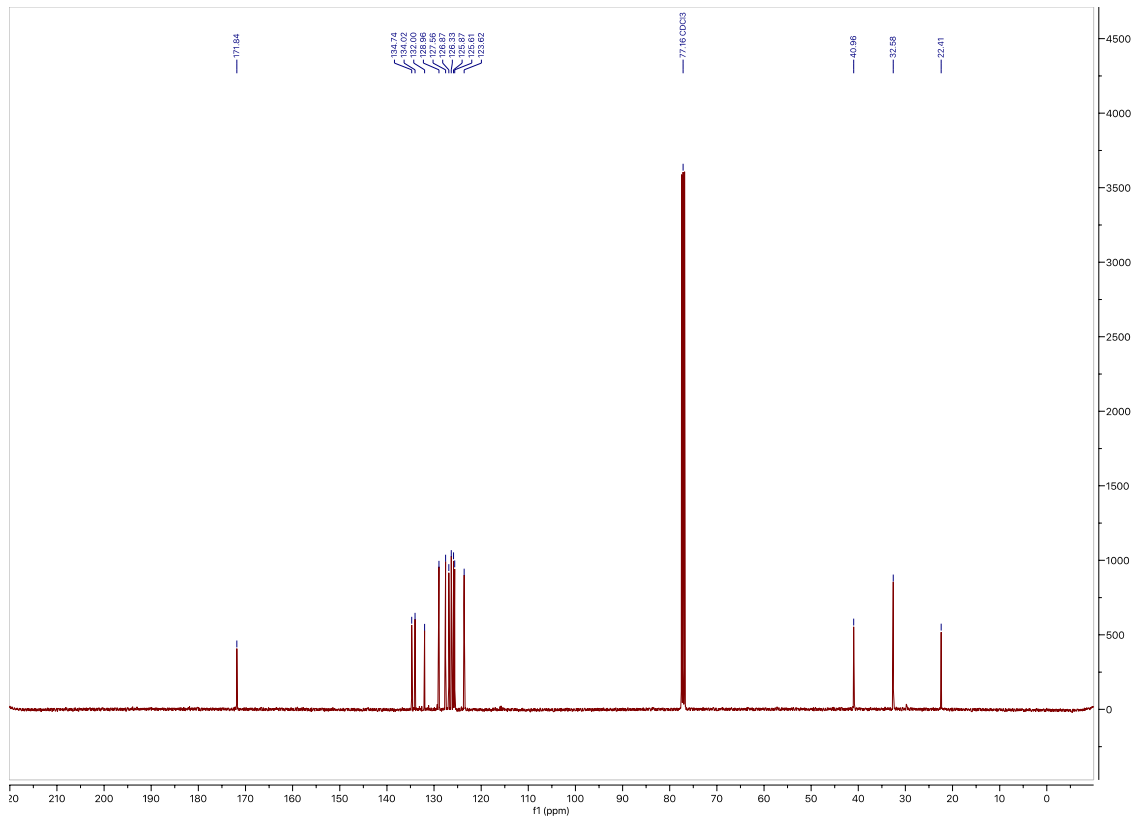

# Product 17o

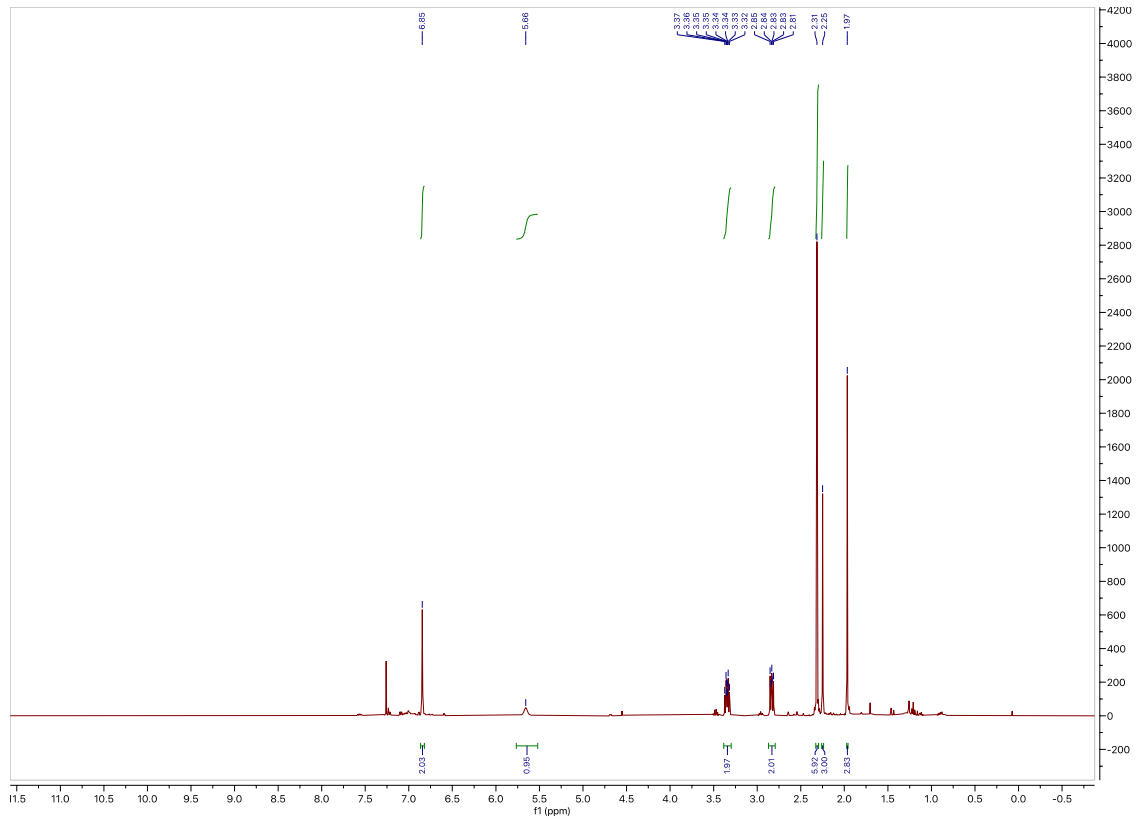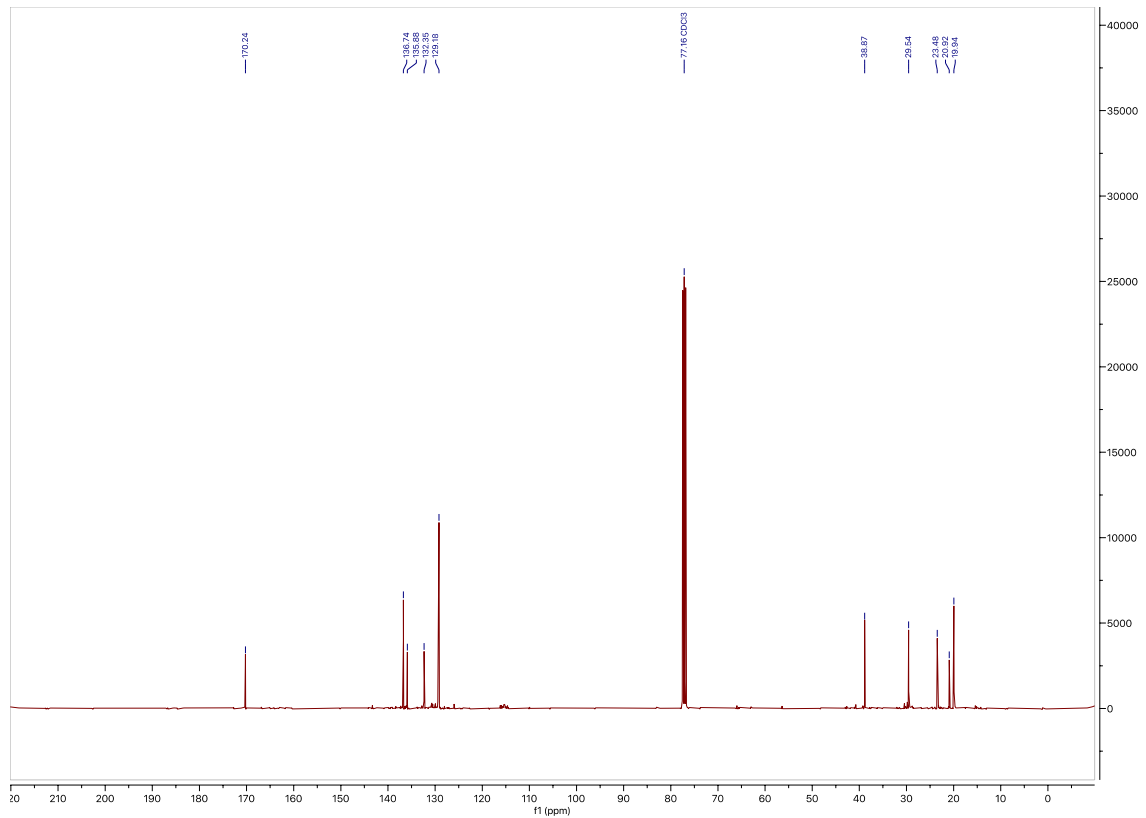

Product 17p

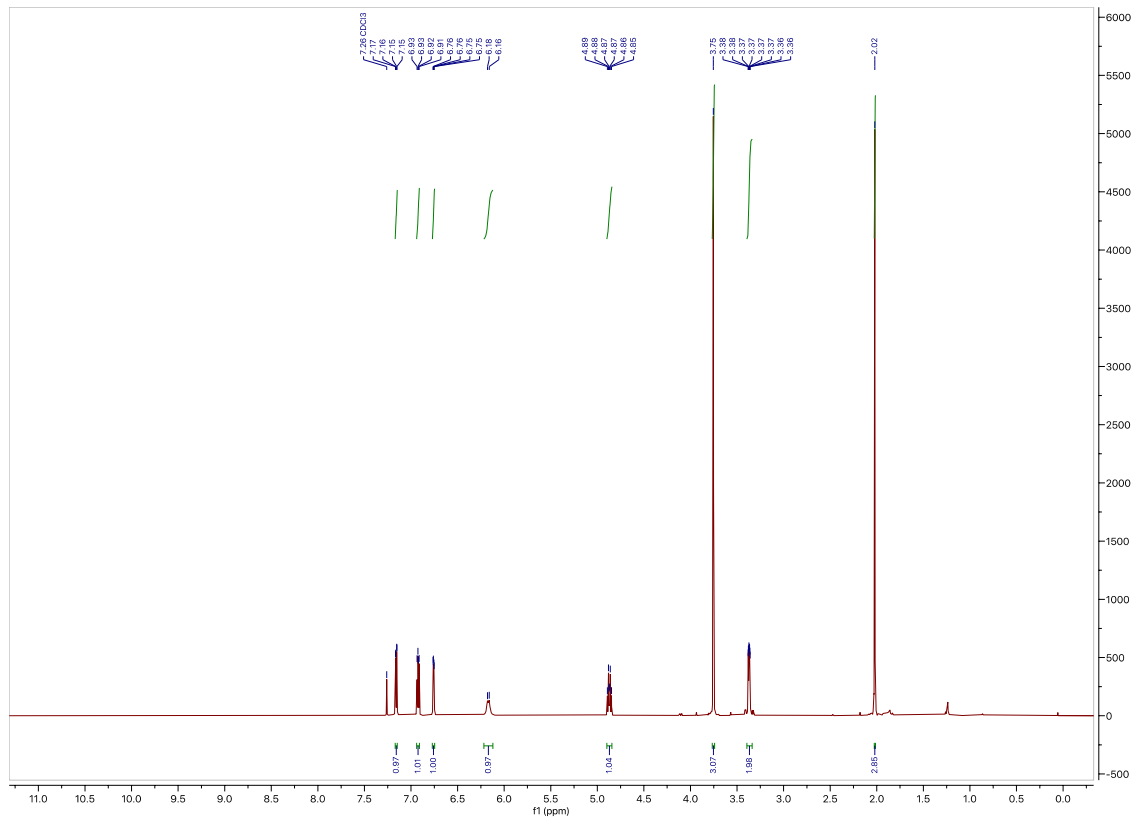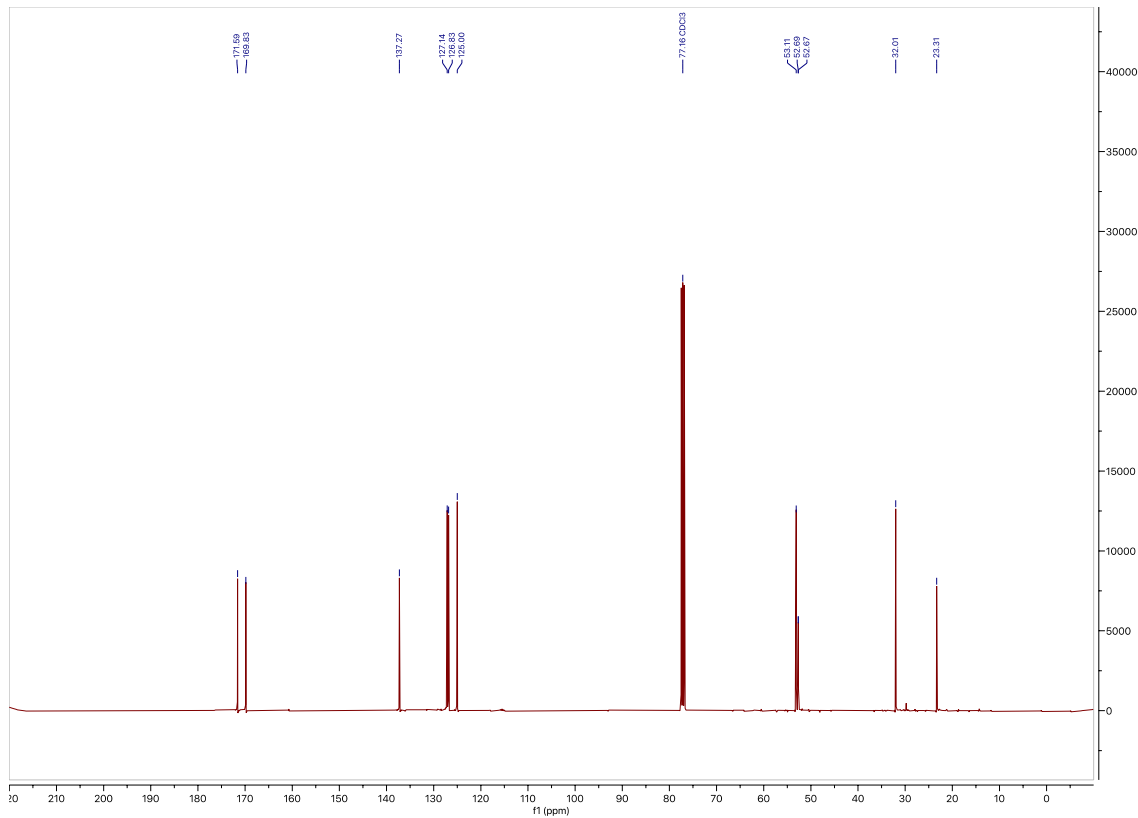

Product rac-17p

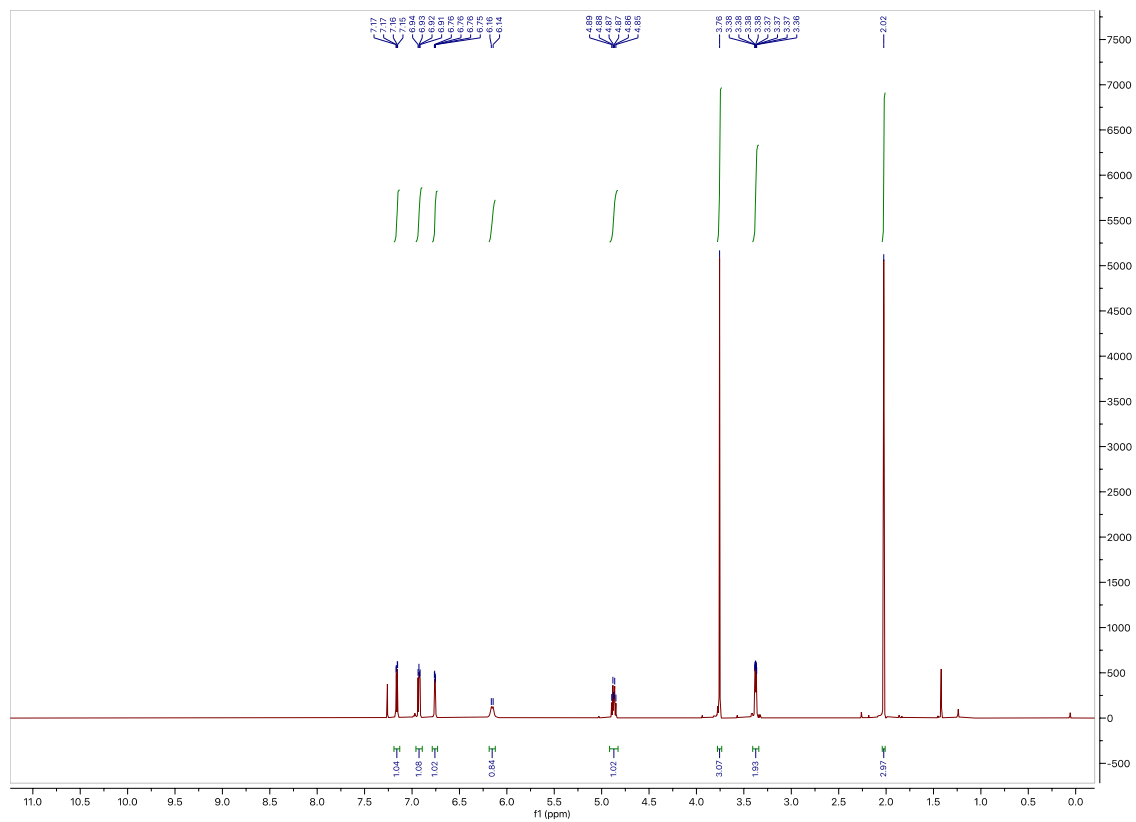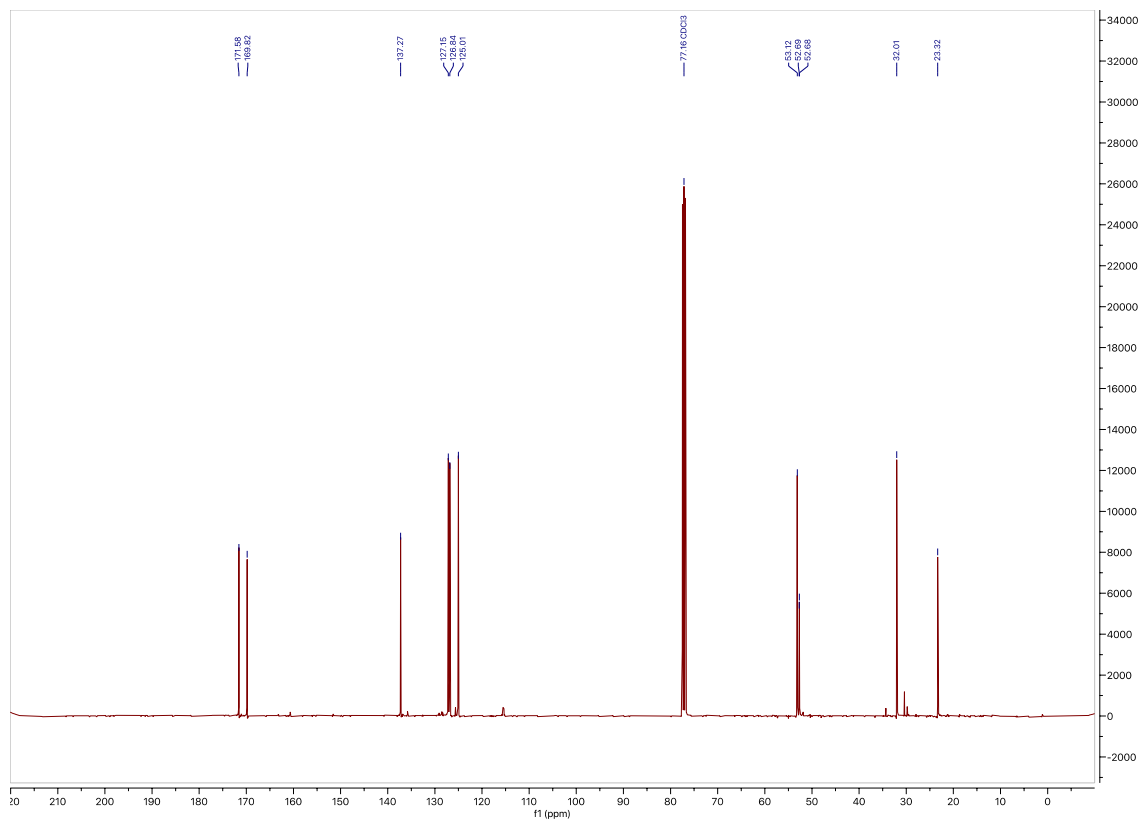

## References

1. T. Patra, S. Mukherjee, J. Ma, F. Strieth-Kalthoff, F. Glorius, *Angew. Chem. Int. Ed.* **2019**, *58*, 10514 – 10520.
